Hantelys, Godet, David et al, July 2019

# **Vasohibin1, a new IRES trans-acting factor for induction of (lymph)angiogenic factors in early hypoxia**

Fransky Hantelys<sup>1\*</sup>, Anne-Claire Godet<sup>1\*</sup>, Florian David<sup>1\*</sup>, Florence Tatin<sup>1</sup>, Edith Renaud-Gabardos<sup>1</sup>, Françoise Pujol<sup>1</sup>, Leila Diallo<sup>1</sup>, Isabelle Ader<sup>2</sup>, Laetitia Ligat<sup>3</sup>, Anthony K. Henras<sup>4</sup>, Yasufumi Sato<sup>5</sup>, Angelo Parini<sup>1</sup>, Eric Lacazette<sup>1</sup>, Barbara Garmy-Susini<sup>1</sup>, and Anne-Catherine Prats<sup>1§</sup>

<sup>1</sup>UMR 1048-I2MC, Inserm, Université de Toulouse, UPS, Toulouse, France.

<sup>2</sup>UMR 1031-STROMALAB, Inserm, CNRS ERL5311, Etablissement Français du Sang-Occitanie (EFS), National Veterinary School of Toulouse (ENVT), Université de Toulouse, UPS, Toulouse, France.

<sup>3</sup>UMR 1037-CRCT, Inserm, CNRS, Université de Toulouse, UPS, Pôle Technologique-Plateau Protéomique, Toulouse, France.

<sup>4</sup>UMR 5099-LBME, CBI, CNRS, Université de Toulouse, UPS, Toulouse, France.

<sup>5</sup>Department of Vascular Biology, Institute of Development, Aging and Cancer, Tohoku University, Sendai, Japan

\* Equal contribution

§Corresponding author.

Contact information : Anne-Catherine Prats, Institut des Maladies Métaboliques et Cardiovasculaires, 1, Avenue Jean Poulhes, BP 84225, 31432 Toulouse cedex 4, France (e-mail: [Anne-Catherine.Prats@inserm.fr](mailto:Anne-Catherine.Prats@inserm.fr))

**Running title:** IRES regulation during hypoxia

Hantelys, Godet, David et al, July 2019

## ABSTRACT

Hypoxia, a major inducer of angiogenesis, is known to trigger major changes of gene expression at the transcriptional level. Furthermore, global protein synthesis is blocked while internal ribosome entry sites (IRES) allow specific mRNAs to be translated. Here we report the transcriptome and translome signatures of (lymph)angiogenic genes in hypoxic HL-1 cardiomyocytes: most genes are not induced at the transcriptome-, but at the translome level, including all IRES-containing mRNAs. Our data reveal activation of (lymph)angiogenic mRNA IRESs in early hypoxia. We identify vasohibin1 (VASH1) as an IRES trans-acting factor (ITAF) able to activate FGF1 and VEGFD IRESs in hypoxia while it inhibits several IRESs in normoxia. Thus this new ITAF may have opposite effects on IRES activities. These data suggest a generalized process of IRES-dependent translational induction of (lymph)angiogenic growth factors expression in early hypoxia, whose pathophysiological relevance is to trigger formation of new functional vessels in ischemic heart. VASH1 is not always required, indicating that the IRESome composition is variable, thus allowing subgroups of IRESs to be activated under the control of different ITAFs.

**Key words:** cardiomyocyte/ hypoxia / IRES/ translational control/ vasohibin

## INTRODUCTION

Hypoxia constitutes a major stress in different pathologies including cancer, as well as ischemic pathologies where artery occlusion leads to hypoxic conditions. In all these pathologies, hypoxia induces a cell response that stimulates angiogenesis to re-feed starved cells with oxygen and nutrients (1). Recently it has been shown that lymphangiogenesis is also induced by hypoxia (2). Hypoxia-induced (lymph)angiogenesis is mediated by strong modification of gene expression at both transcriptional and post-transcriptional levels (1, 3). A major way of gene expression regulation is mediated at the transcriptional level by the hypoxia inducible factor 1 (HIF1), a transcription factor stabilized by oxygen deprivation, that activates transcription from promoters containing hypoxia responsive elements (HRE). One of the well-described HIF1 targets is vascular endothelial growth factor A (VEGFA), a major angiogenic factor (4, 5). However, two other major angiogenic or lymphangiogenic growth factors, fibroblast growth factor 2 (FGF2) and VEGFC, respectively, are induced by hypoxia in a HIF-independent manner by a translational mechanism, indicating the importance of the post-transcriptional regulation of gene expression in this process (2, 6).

Translational control of gene expression plays a crucial role in the stress response. In particular, translation of most mRNAs, occurring by the classical cap-dependent mechanism, is silenced whereas alternative translation mechanisms allow enhanced expression of a small group of messengers involved in the control of cell survival (3, 7, 8). One of the major alternative mechanisms able to overcome this global inhibition of translation by stress depends on internal ribosome entry sites (IRESs) that correspond to RNA structural elements allowing the direct recruitment of the ribosome on mRNA. As regards the molecular mechanisms of IRES activation by stress, several studies have reported the involvement of RNA binding proteins, called IRES trans-acting factors (ITAFs), able to stabilize the adequate RNA conformation allowing ribosome recruitment (9-13). Interestingly, subcellular relocalization of ITAFs plays a critical role in IRES-dependent translation (14). Indeed, many RNA-binding proteins are known to shuttle between nucleus and cytoplasm, and it has been reported that cytoplasmic relocalization of ITAFs such as PTB, PCBP1, RBM4 or nucleolin is critical to activate IRES-dependent translation (10, 13, 14). In contrast, other ITAFs such as hnRNP A1, may have a

Hantelys, Godet, David et al, July 2019

negative impact on IRES activity when accumulating in the cytoplasm (15). However, how ITAFs participate in the regulation of the hypoxic response remains a challenging question to address.

IRESs are present in the mRNAs of several (lymph)angiogenic growth factors in the FGF and VEGF families, suggesting that the IRES-dependent mechanism might be a major way to activate angiogenesis and lymphangiogenesis during stress (2, 10, 13, 16-19). However, most studies of the role of hypoxia in gene expression regulation have been performed in tumoral hypoxia, while it has been reported that tumoral angiogenesis leads to formation of abnormal vessels that are non functional, which strongly differs from non tumoral angiogenesis that induces formation of functional vessels (20). This suggests that gene expression regulation in response to hypoxia may be different in cancer versus ischemic pathologies. In particular, the role of IRESs in the control of gene expression in ischemic heart, the most frequent ischemic pathology, remains to be elucidated.

Here we analyzed the transcriptome and the translome of (lymph)angiogenic growth factors in hypoxic cardiomyocytes, and studied regulation of IRES activities in early and late hypoxia. Data show that in cardiomyocyte, (lymph)angiogenic growth factors are mostly regulated at the translational level. Interestingly, FGF and VEGF mRNA IRESs are sequentially activated at different times of early hypoxia in contrast to IRESs of non angiogenic messengers. We also looked for ITAFs governing IRES activation in hypoxia and identified vasohibin1 (VASH1) as a new ITAF specific of the earliest activated FGF1 IRES in cardiomyocytes. VASH1 knock-down strongly down-regulates the earliest-induced FGF1 IRES but not the other IRESs, revealing that this protein is a new IRES trans-acting factor (ITAF) in cardiomyocytes, specific of early hypoxia.

## RESULTS

### *Most (lymph)angiogenic genes are not induced at the transcriptome level of hypoxic cardiomyocytes.*

In order to analyze expression of angiogenic and lymphangiogenic growth factors in hypoxic cardiomyocytes, the HL-1 cell line was chosen: although immortalized, it keeps the beating phenotype specific to cardiomyocyte (21). HL-1 cells were submitted to increasing times of hypoxia, from 5 minutes to 24 hours and their transcriptome was analyzed on a Fluidigm Deltagene PCR array targeting 96 genes of angiogenesis, lymphangiogenesis and/or stress (Fig. 1, EV Fig. 1, EV Table 1). Data showed a significant increase of *Vegfa*, PAI-1 and apelin (*Apln*) mRNA levels, with a peak at 8h of hypoxia for *Vegfa* and PAI1 and 24h for *Apln*. These three genes are well described HIF1 targets (4, 22, 23). However, only 5-8% of the genes were induced, while the mRNA levels of several major angio- or lymphangiogenic factors, such as FGF2 and VEGFC, were strongly decreased after 4 h or 8 h of hypoxia. These data indicate that the transcriptional response to hypoxia in cardiomyocytes is not the major mechanism controlling expression of (lymph)angiogenic factors, suggesting that post-transcriptional mechanisms are involved.

Hantelys, Godet, David et al, July 2019

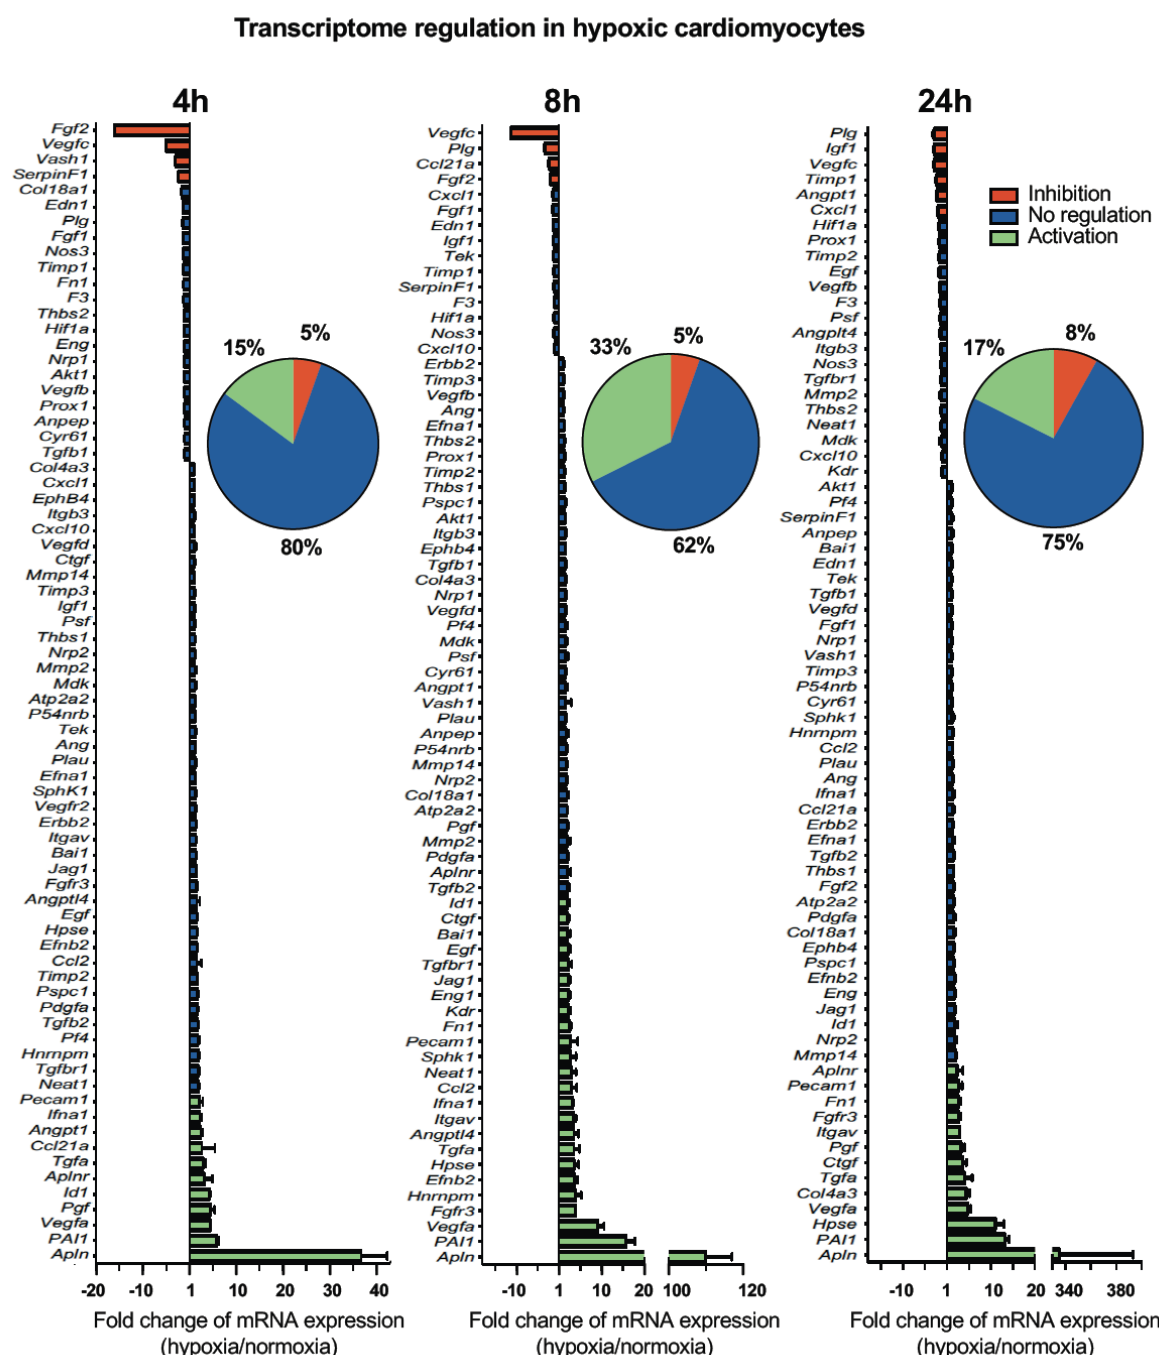

**Figure 1. Most (lymph)angiogenic genes are not induced at the transcriptome level in hypoxic cardiomyocytes.**

Total RNA was purified from HL-1 cardiomyocytes submitted to increasing times from 5 min to 24 h of hypoxia at 1% O<sub>2</sub>, as well as from normoxic cardiomyocytes as a control. cDNAs were synthesized and used for a Fluidigm deltagene PCR array dedicated to genes related to (lymph)angiogenesis or stress (EV Table 6). Relative quantification (RQ) of gene expression during hypoxia was calculated using the  $2^{-\Delta\Delta CT}$  method with normalization to 18S and to normoxia. mRNA levels are presented by histograms for the times of 4 h, 8 h and 24 h, as the fold change of repression (red) or induction (green) normalized to normoxia. Non-regulated mRNAs are represented in blue. When the RQ value is inferior to 1, the fold change is expressed as  $-1/RQ$ . The percentage of repressed, induced, and non-regulated mRNAs is indicated for each time. For earlier times of 5 min to 2 hr, the percentages are shown in EV Fig. 1. The detailed values for all the times of the kinetics are presented in EV Table 1.



Hantelys, Godet, David et al, July 2019

# *mRNAs of most (lymph)angiogenic genes are recruited into polysomes in hypoxic cardiomyocytes.*

Based on the fact that mRNA present in polysomes are actively translated, we tested the hypothesis of translational induction by analysing the recruitment of mRNAs into polysomes. This experiment was performed in early and late hypoxia. The polysome profile showed that translational activity in normoxic HL-1 cells was low but decreased after 4 h of hypoxia, with a shift of the polysome to monosome ratio from 1,55 to 1,40 (Fig. 2A). 4E-BP1 appeared as a single band and its phosphorylation profile did not change upon hypoxia, suggesting that it is already hypophosphorylated in normoxia in these cells (EV Fig. 2A and 2B). In contrast, translation blockade was confirmed by the strong phosphorylation of eIF2 $\alpha$  (Fig. 2B, EV Fig. 2C). 94% of the genes of the (lymph)angiogenic array showed a more sustained recruitment into polysomes under hypoxic conditions (Fig. 2C, EV Table 2). This translational induction not only targets major angiogenic factors and their receptors (*Vegfa*, *Fgf1*, *Pdgfa*, *Fgfr3*, *Vegfr2*...), but also genes involved in cardiomyocyte survival in ischemic heart (*Igf1*, *Igf1R*) or in inflammation (*BAI1*, *Tgfb*). These data suggest that in cardiomyocytes, the main response to early hypoxia of (lymph)angiogenic genes is not transcriptional, but translational.

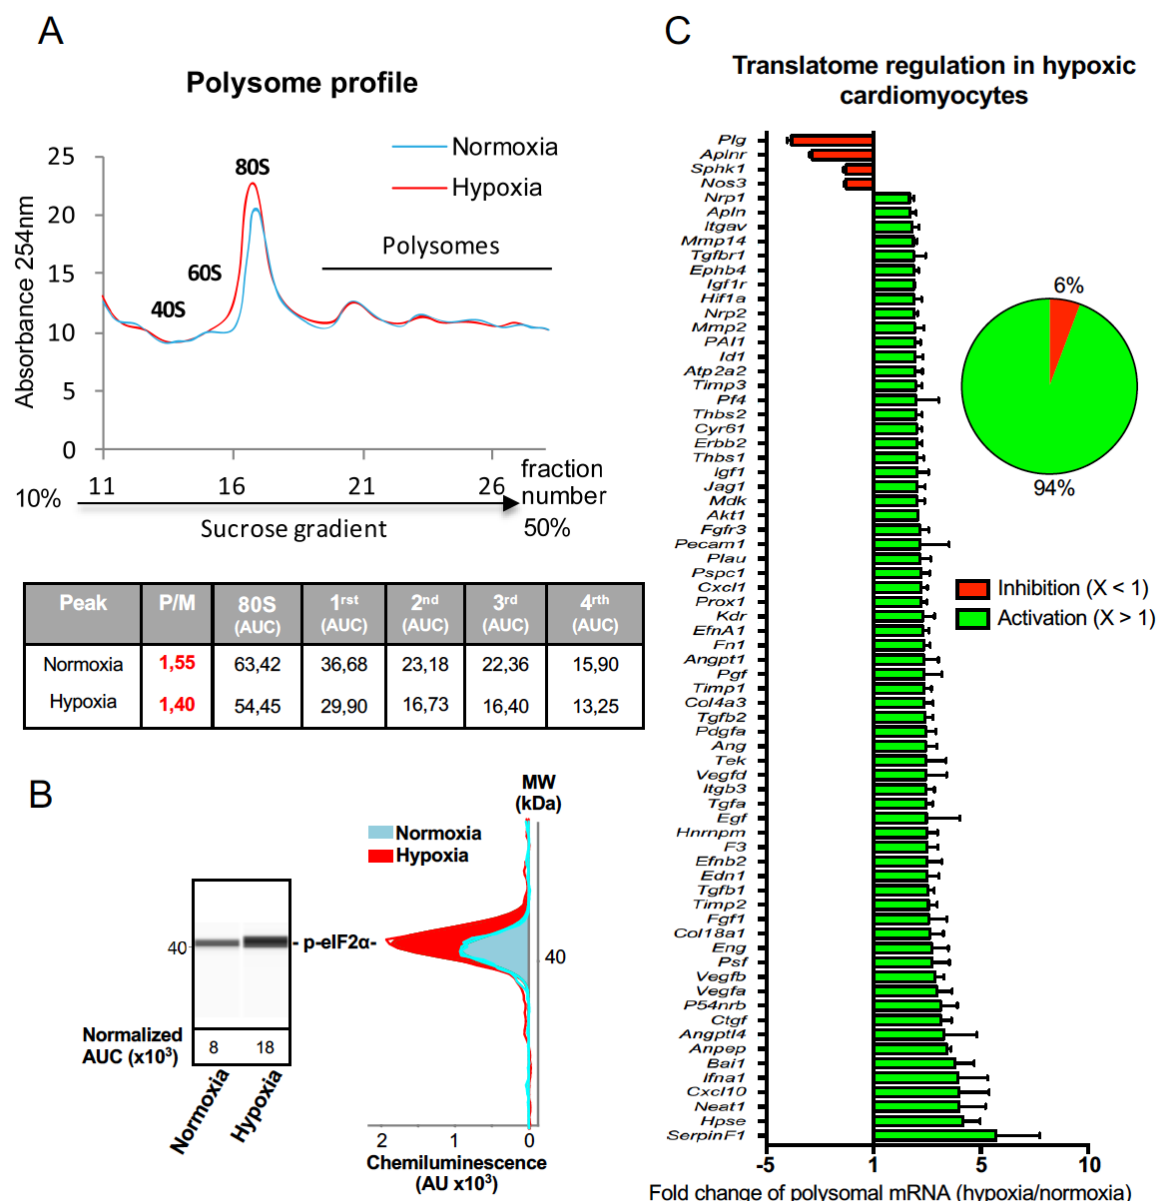

# **Figure 2. mRNAs of most (lymph)angiogenic genes are mobilized into polysomes in hypoxic cardiomyocytes.**

A-C In order to isolate translated mRNAs, polysomes were purified on sucrose gradient from HL-1 cardiomyocytes in normoxia or after 4 hr of hypoxia at 1% O<sub>2</sub>, as described in Materials and Methods. P/M ratio (polysome/monosome) was determined by delimiting the 80s and polysome peaks by taking the lowest plateau values between each peak and by calculating the area under the curve (AUC). Then the sum of area values of the four polysome peaks was divided by the area of the 80s peak (A). Translation blockade was measured by eIF2 $\alpha$  phosphorylation quantification by capillary Simple Western using normalization against total protein as described in Mat. & Meth. (B).

RNA was purified from polysome fractions and from cell lysate before loading. cDNA and PCR array were performed as in Figure 1. Polysomes profiles are presented for normoxic and hypoxic cardiomyocytes. Relative quantification (RQ) of gene expression during hypoxia was calculated using the  $2^{-\Delta\Delta CT}$  method with normalization to 18S and to normoxia. mRNA levels (polysomal RNA/total RNA) are shown as fold change of repression (red) or induction (green) in hypoxia normalized to normoxia as in Figure 1 (C). When the RQ value is inferior to 1, the fold change is expressed as -1/RQ. The detailed values are available in EV Table 2.

# **IRES-containing mRNAs are more efficiently mobilized into polysomes under hypoxic conditions.**

IRES-dependent translation has been reported to drive translation of several mRNAs in stress conditions (2, 3, 6, 24). Thus we focused onto the regulation of the different IRES-containing mRNAs present in the Fluidigm array (Fig. 3). Interestingly, the only IRES-containing mRNA to be significantly induced at the transcriptome level by hypoxia was *Vegfa* (Fig. 3A and EV Fig. 3). Expression of the apelin receptor (*Aplnr*), presumably devoid of IRES but transcriptionally induced during hypoxia, is also shown for comparison.

Polysome recruitment of these IRES-containing mRNAs is shown in figure 3B. Clearly, *Fgf1*, *Vegfa*, *Vegfd*, *Cyr61*, *Hif1a* and *Igf1r* mRNAs were recruited into polysomes under hypoxia 2 to 3 times more than in normoxia, suggesting an important induction in terms of translation. In contrast, *Aplnr* mRNA recruited into polysomes decreased about three times. The data are not available for *Fgf2* and *Vegfc* mRNAs, which were not detectable. These results indicate that hypoxia in cardiomyocytes, although blocking global cap-dependent translation, induces translation of all detectable IRES-containing angiogenic factor mRNAs. This mechanism occurs as soon as 4 hours after oxygen deprivation, thus corresponding to an early event in the hypoxic response.

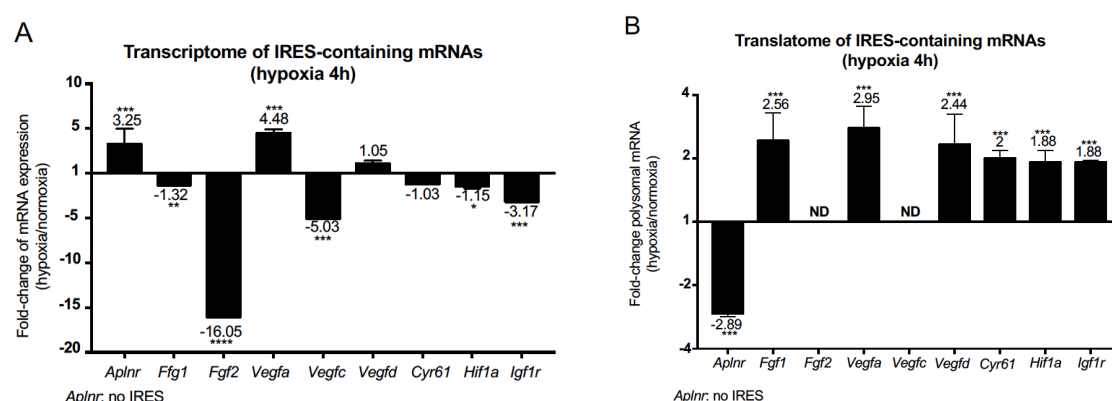

# **Figure 3. IRES-containing mRNAs are more efficiently associated to polysomes in hypoxic conditions.**

A-B RQ values for IRES-containing mRNA transcriptome (A) and translome (B) extracted from the PCR arrays shown in Figures 1 and 2. The gene *Aplnr* (apelin receptor) was chosen as a control without an IRES. *Vegfc* and *Fgf2* mRNAs, repressed in the transcriptome, were below the detection threshold in polysomes (ND). Histograms correspond to means  $\pm$  standard deviation, \*p<0.05, \*\*p<0.01, \*\*\*p<0.001, \*\*\*\*p<0.0001 compared to normoxia.

# ***IRESs of (lymph)angiogenic factor mRNAs are activated during early hypoxia.***

To confirm that the polysome recruitment of IRES-containing mRNAs actually corresponds to a stimulation of IRES-dependent translation, IRESs from FGF and VEGF mRNAs were introduced into a bicistronic dual luciferase gene expression cassette (Fig. 4A). As controls, two IRESs from non angiogenic mRNAs, c-myc and EMCV IRESs, were used. A negative control without IRES was provided by an hairpin inserted between the two cistrons (25). The well established bicistronic vector strategy, previously validated by us and others, allows to measure IRES activity revealed by expression of the second cistron, LucF (2, 25). The bicistronic cassettes were subcloned into lentivectors, as HL-1 cells are not efficiently transfected by plasmids but can be easily transduced by lentivectors with an efficiency of more than 80% (not shown). HL-1 cardiomyocytes were first transduced with the lentivector containing the FGF1 IRES and a kinetics was performed from 1 to 24 hours of hypoxia. Luciferase activities were measured from cell extracts and IRES activities reported as the LucF/LucR luminescence ratio. Data showed an increase of IRES activity between 4 to 8 hours whereas it decreased from 16 h to 24 h (Fig. 4B). Expression of endogenous FGF1 was analyzed after 8 hours of hypoxia. FGF1 protein quantification normalized to total proteins showed that IRES induction correlates with an increased expression of FGF1 protein (Fig. 4C). This is also consistent with the increase of FGF1 mRNA recruitment into polysomes observed above (Fig. 3C, EV Table 2). To determine whether this transient induction could affect other IRESs, HL-1 cells were then transduced by the complete series of lentivectors described above (Fig. 4A) and submitted to 4, 8 or 24 hours of hypoxia. Results showed an increase of all FGF and VEGF IRES activities in early hypoxia (4 hours and/or 8 hours), while the c-myc IRES was activated only in late hypoxia after 24 hours (Fig. 4D). The viral EMCV IRES was activated in both early (4 hours) and late (24 hours) hypoxia. The hairpin control was not induced (EV Table 3J). These data revealed two waves of IRES activation in response to hypoxia: a first wave concerns IRESs from (lymph)angiogenic growth factor mRNAs that are activated during early hypoxia, while a second wave concerns “non-angiogenic” c-myc and EMCV IRESs, that are activated in late hypoxia.

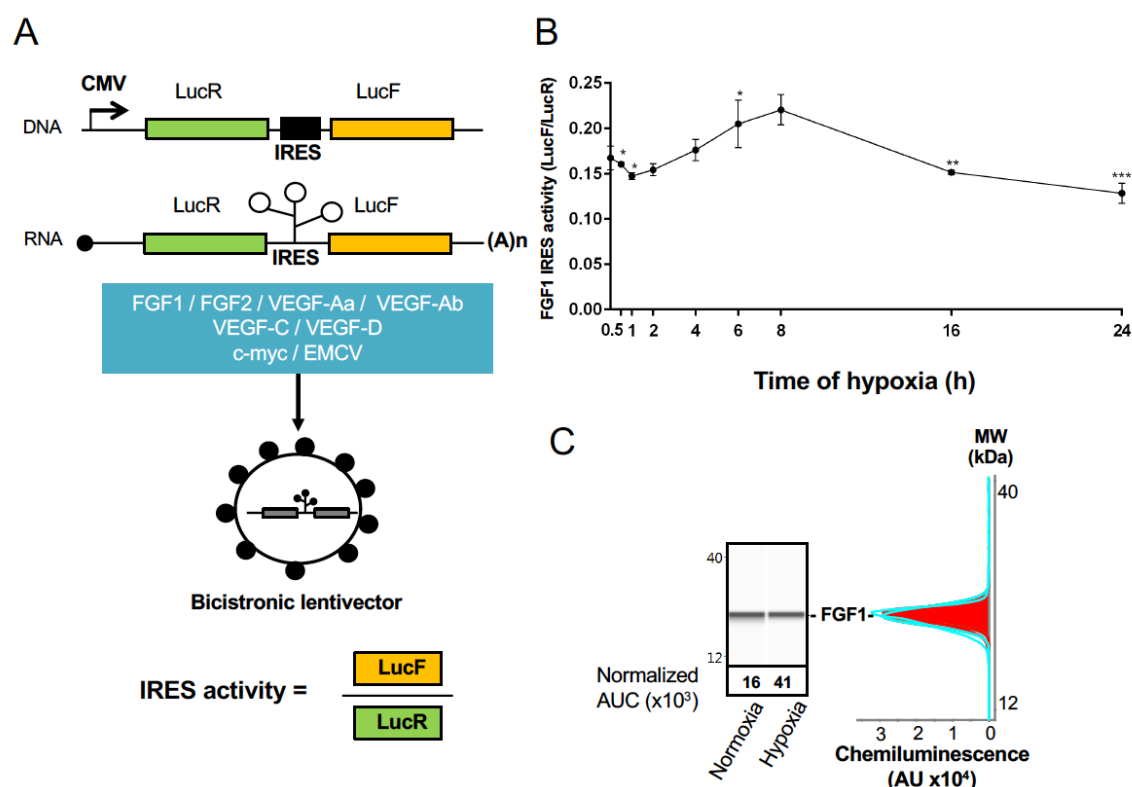

Hantelys, Godet, David et al, July 2019

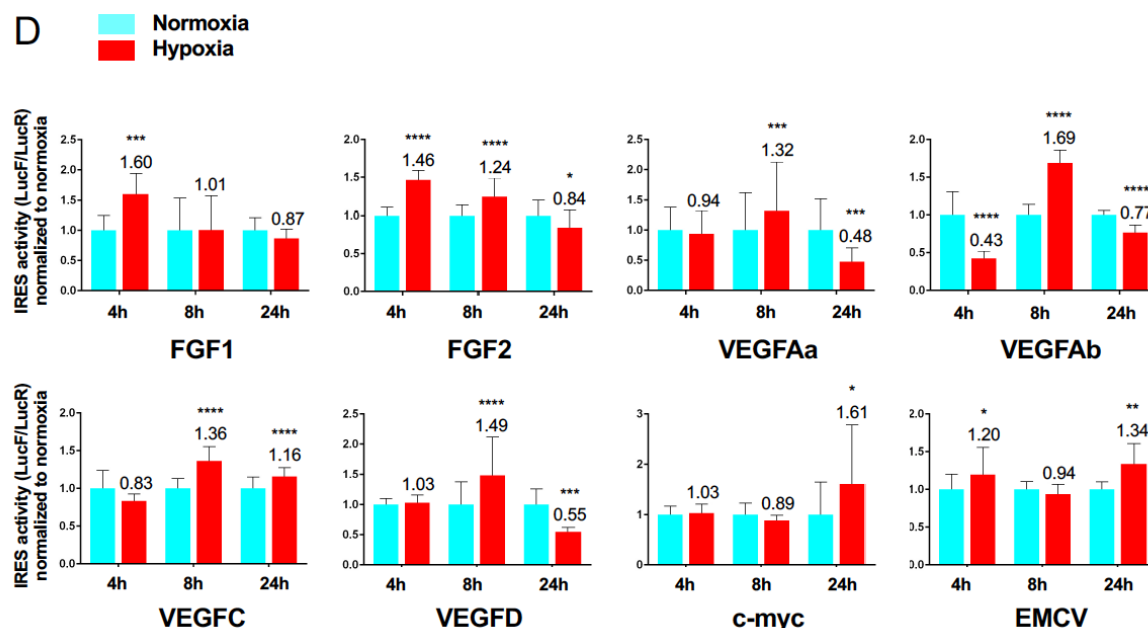

**Figure 4. IRESs from (lymph)angiogenic factor mRNAs are activated in early hypoxia.**

A-D To measure IRES-dependent translation during hypoxia, HL-1 cardiomyocytes were transduced with bicistronic dual luciferase lentivectors (termed “Lucky-Luke”) containing different IRESs cloned between the genes of renilla (LucR) and firefly (LucF) luciferase (A). In bicistronic vectors, translation of the first cistron LucR is cap-dependent whereas translation of the second cistron LucF is IRES-dependent (25). Cardiomyocytes transduced by the CRF1AL+ lentivector Lucky-Luke reporter containing FGF1 IRES were submitted to an hypoxia time-course (0h, 1h, 2h, 4h, 6h, 8h, 16h and 24h) and each time point compared to 0h point with one-tailed t-test (B). Endogenous FGF1 protein expression was measured by capillary Simple Western, from extracts of cardiomyocytes in normoxia or submitted to 8h of hypoxia (C). HL-1 cardiomyocytes transduced by different Lucky-Luke constructs were submitted to 4h, 8h or 24h of hypoxia and luciferase activities measured. IRES activities during hypoxia, expressed as LucF/LucR ratio, are normalized to normoxia. Three groups of activation were identified: FGF IRESs, VEGF IRESs, non-angiogenic IRESs at 4h, 8h or 24h of hypoxia, respectively. Histograms correspond to means  $\pm$  standard deviation of the mean, with a one-tailed t-test \* $p < 0.05$ , \*\* $p < 0.01$ , \*\*\* $p < 0.001$ , \*\*\*\* $p < 0.0001$ , compared to normoxia. For each IRES the mean has been calculated from three independent experiments with three biological replicates ( $n=9$ ). All detailed values are presented in EV Table 3. A no-IRES control was also performed and values are presented in EV Table 3 J.

### **Identification of IRES-bound proteins in hypoxic cardiomyocytes reveals vasohibin1 as a new RNA-binding protein.**

Early activation of angiogenic factor IRESs during hypoxia suggested that specific ITAFs may be involved between 4 and 8 hours. In an attempt to identify such ITAFs, we used the technology of biomolecular analysis coupled to mass spectrometry (BIA-MS), validated for ITAF identification in two previous studies (13, 26). Biotinylated RNAs corresponding to FGF1 (4 hours activation), VEGFAa (8 hours activation) and EMCV IRESs (24 hours activation) were used as probes for BIA-MS. Hooked proteins from normoxic and hypoxic HL-1 cells were then recovered and identified (Fig. 5A-B, EV Table 4). Surprisingly, except for nucleolin bound to VEGFAa and EMCV IRES in normoxia, no known ITAF was identified as bound to these IRESs in normoxia or in hypoxia. Interestingly, besides several proteins unrelated to (lymph)angiogenesis, we detected the presence of vasohibin1 (VASH1), a protein described as an endothelial cell-produced angiogenesis inhibitor, but also for its role in stress tolerance and cell survival (Fig. 5C) (27, 28). However, this secreted protein has never been reported for any RNA-binding activity. VASH1 bound to the FGF1 IRES under 4 hours or 8 hours of hypoxia, but not under normoxia (EV Table 4). This protein also bound to the EMCV IRES both in normoxia and hypoxia but not to the VEGFA IRES. In order to address the RNA binding

Hantelys, Godet, David et al, July 2019

potential of VASH1, we performed an *in silico* analysis of VASH1 protein sequence that predicted two conserved RNA-binding domains (RBD) in the N- and C-terminal parts of the full length protein, respectively (Fig. 5C, EV Fig. 4A and 4B). The direct interaction of VASH1 with FGF1, VEGFAa and EMCV IRESs was assessed by surface plasmon resonance using the full length recombinant 44 kDa protein, resulting in the measurement of affinity constants of 6.5 nM, 8.0 nM and 9.6 nM, respectively (Fig. 5D-5F). These data indicate that VASH1 exhibits a significant RNA binding activity.

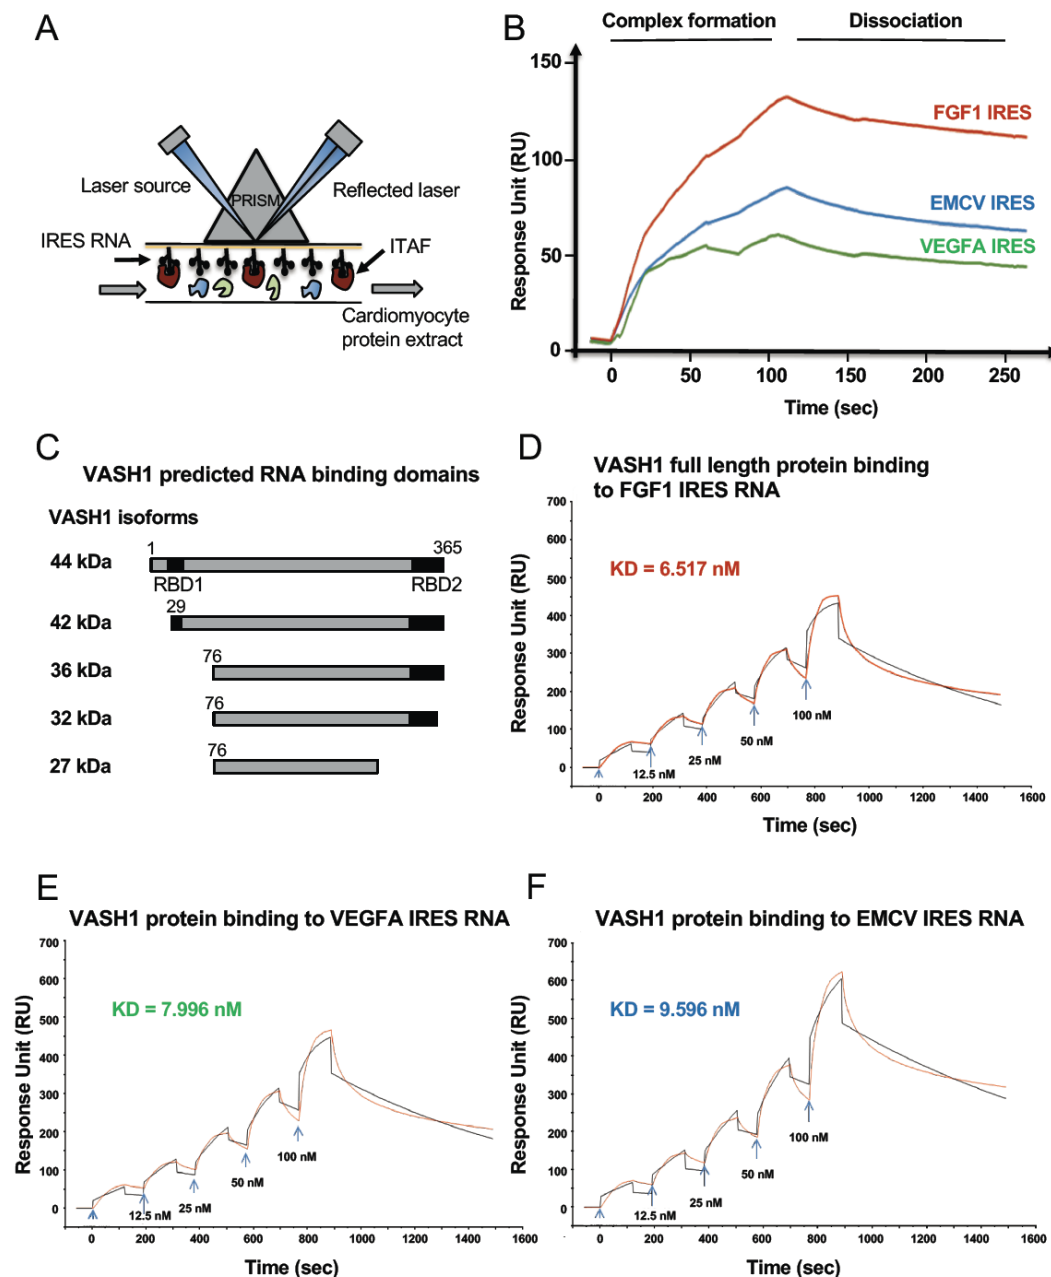

**Figure 5. Identification of IRES-bound proteins in hypoxic cardiomyocytes reveals vasohibin1 as a new RNA-binding protein.**

A-F Biotinylated IRES RNAs were transcribed *in vitro* and immobilized on the sensorchip of the BIAcore T200 optical biosensor device (A). Total cell extracts from normoxic or hypoxic HL-1 cardiomyocytes were injected in the device. Complex formation and dissociation were measured (see Mat. & Meth) (B). Bound proteins were recovered as described in Mat. & Meth. and identified by mass spectrometry (LC-MS/MS) after tryptic digestion. The list of proteins bound in normoxia and hypoxia to FGF1, VEGFAa and EMCV IRESs is shown in EV Table 4. VASH1 protein was identified bound to FGF1 (hypoxia) and EMCV IRESs (hypoxia and normoxia), but not to VEGFA IRES. A diagram of VASH1 RNA-binding properties is shown, with VASH1 isoforms described by Sonoda et al (37) (C). The predicted RNA binding domains (RBD1 and RBD2) shown in EV Figure



Hantelys, Godet, David et al, July 2019

4, conserved in mouse and human, are indicated (C). Recombinant full-length 44 kDa VASH1 was injected into the Biacore T200 device containing immobilized FGF1 (D), VEGFAa (E) or EMCV (F) IRES as above. The affinity constants (KD) were calculated (D, E, F) with a Single Cycle Kinetics (SCK) strategy.

### *Vasohibin1 is translationally induced and nuclearized in early hypoxia.*

VASH1 has been previously described for its expression in endothelial cells but never in cardiomyocytes (27). The present BIA-MS study provides evidence that it is expressed in HL-1 cardiomyocytes (EV Table 4). We analyzed the regulation of VASH1 expression during hypoxia: *Vash1* mRNA level strongly decreases after 4 hours of hypoxia whereas it is slightly upregulated after 8 hours (EV Table 1, Fig. 6A). In contrast, analysis of *Vash1* mRNA recruitment into polysomes showed a strong increase at 4 hours of hypoxia (about 7 times)(Fig. 6B), whereas it was not detectable in polysomes at 24 hours (EV Table 2). This indicates that *Vash1* mRNA translation is strongly induced in early hypoxia. VASH1 immunodetection confirmed a strong expression of VASH1 at 4 hours of hypoxia, despite the decrease of its mRNA. VASH1 appeared as foci in both cytoplasm and nucleus (Fig. 6C). The number of foci did not change, but their size significantly increased in hypoxia (Fig. 6D and 6E).

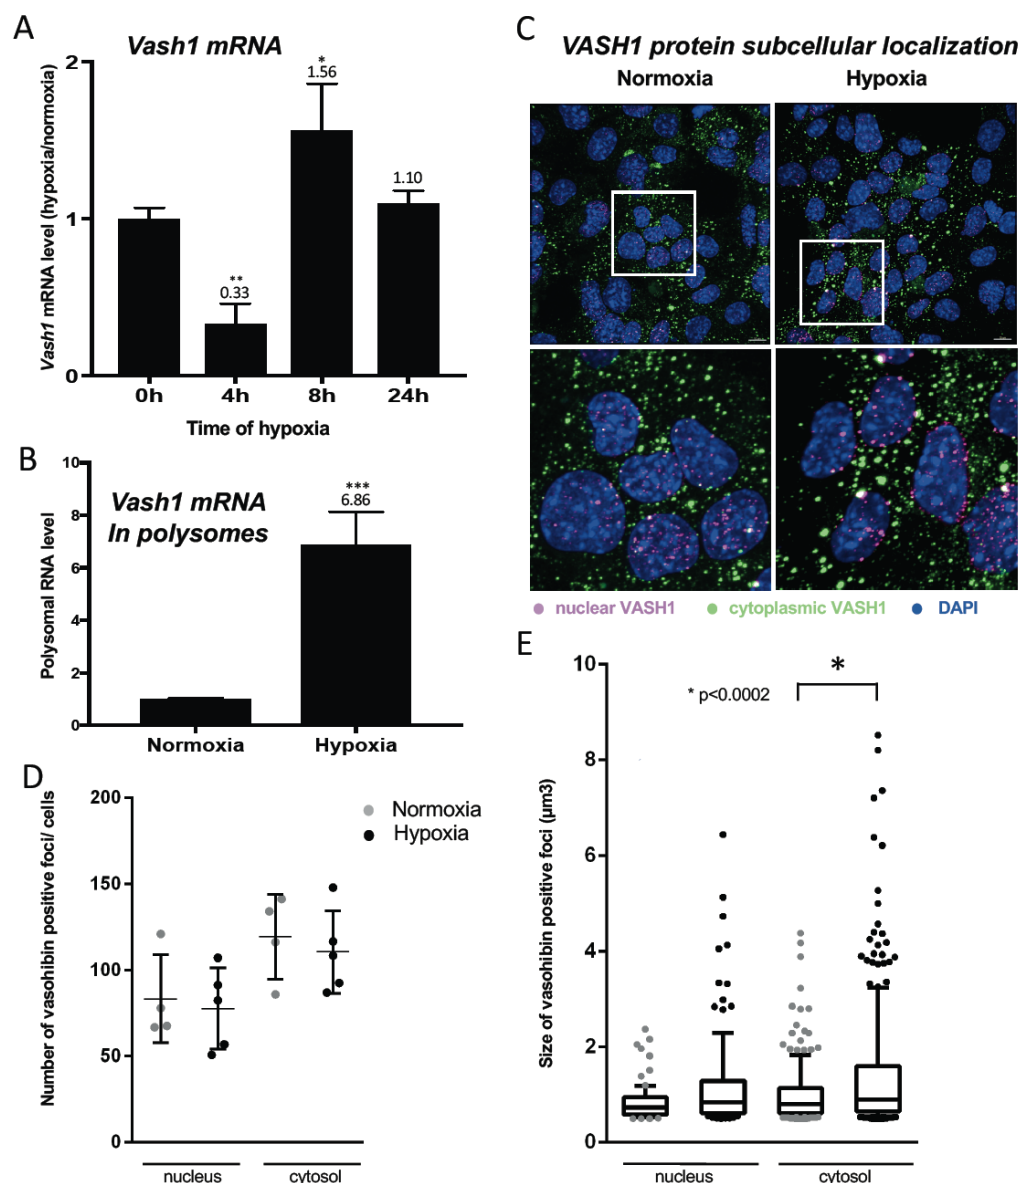



**Figure 6. Vasohibin1 is translationally induced and nuclearized in early hypoxia.**

A-D VASH1 expression was analyzed by RT-qPCR in HL-1 cardiomyocytes in response to hypoxia at the transcriptome and translome levels. Total RNA was purified from cardiomyocytes in normoxia, or submitted to 4 h, 8 h or 24 h of hypoxia (A). Polysomal RNA was purified from cardiomyocytes in normoxia or after 4 h of hypoxia (B). Histograms correspond to mean  $\pm$  standard deviation of the mean, with two-tailed t-test, \* $p < 0.05$ , \*\* $p < 0.01$ , \*\*\* $p < 0.001$ , compared to normoxia. Experiments have been reproduced 3 times independently and a representative triplicate experiment is shown.

VASH1 was immunodetected in HL-1 cardiomyocytes in normoxia or after 4h of hypoxia (C). DAPI staining allows to detect VASH1 nuclear localization (MERGE). VASH1 foci in the nucleus are shown in purple and in the cytoplasm in green using Imaris software. The number of VASH1 foci was quantified in the nucleus and in the cytoplasm in normoxia and after 4 h of hypoxia ( $n = 4-5$  images with a total cell number of 149 in normoxia and 178 in hypoxia) (D). Boxplots of volume of vasohibin foci in normoxia and hypoxia (E). All foci above  $0.5 \mu\text{m}^3$  were counted. Whiskers mark the 10 % and the 90% percentiles with the mean in the center. One-way Anova with Tukey's comparisons test was applied.

***Vasohibin1 is a new ITAF selectively active in early hypoxia.***

The putative ITAF function of VASH1 was assessed by a knock-down approach using an siRNA smartpool (siVASH1). Transfection of HL-1 cardiomyocytes with siVASH1 was able to knock-down VASH1 mRNA with an efficiency of 73% (Fig. 7A). The knock-down of VASH1 protein measured by capillary Western was only 59% (Fig. 7B). This moderate knock-down efficiency was probably due to the long half-life of VASH1, superior to 24h (EV Fig. 5). The effect of VASH1 knock-down was analyzed in HL-1 cells transduced with different IRES-containing bicistronic lentivectors in normoxia or after 8 h of hypoxia. In normoxia, VASH1 knock-down generated a moderate increase of activity for several IRESs (13-16%), significant for VEGFD and EMCV IRESs (Fig. 7C). In contrast, in hypoxia, VASH1 knock-down resulted in a significant decrease of FGF1, VEGFD and EMCV IRES activities, by 64%, 12% and 5%, respectively (Fig. 7D). These data showed that VASH1 behaves as an activator ITAF in hypoxia, limited to FGF1, VEGFD and EMCV IRESs, while it has an inhibitory role on the activities of these IRES in normoxia (Fig. 7C).

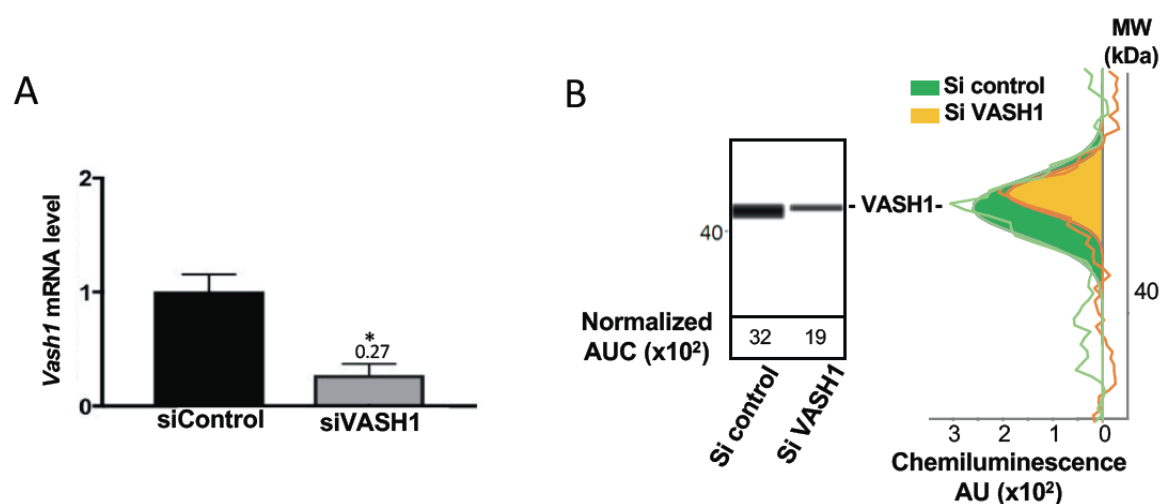

Hantelys, Godet, David et al, July 2019

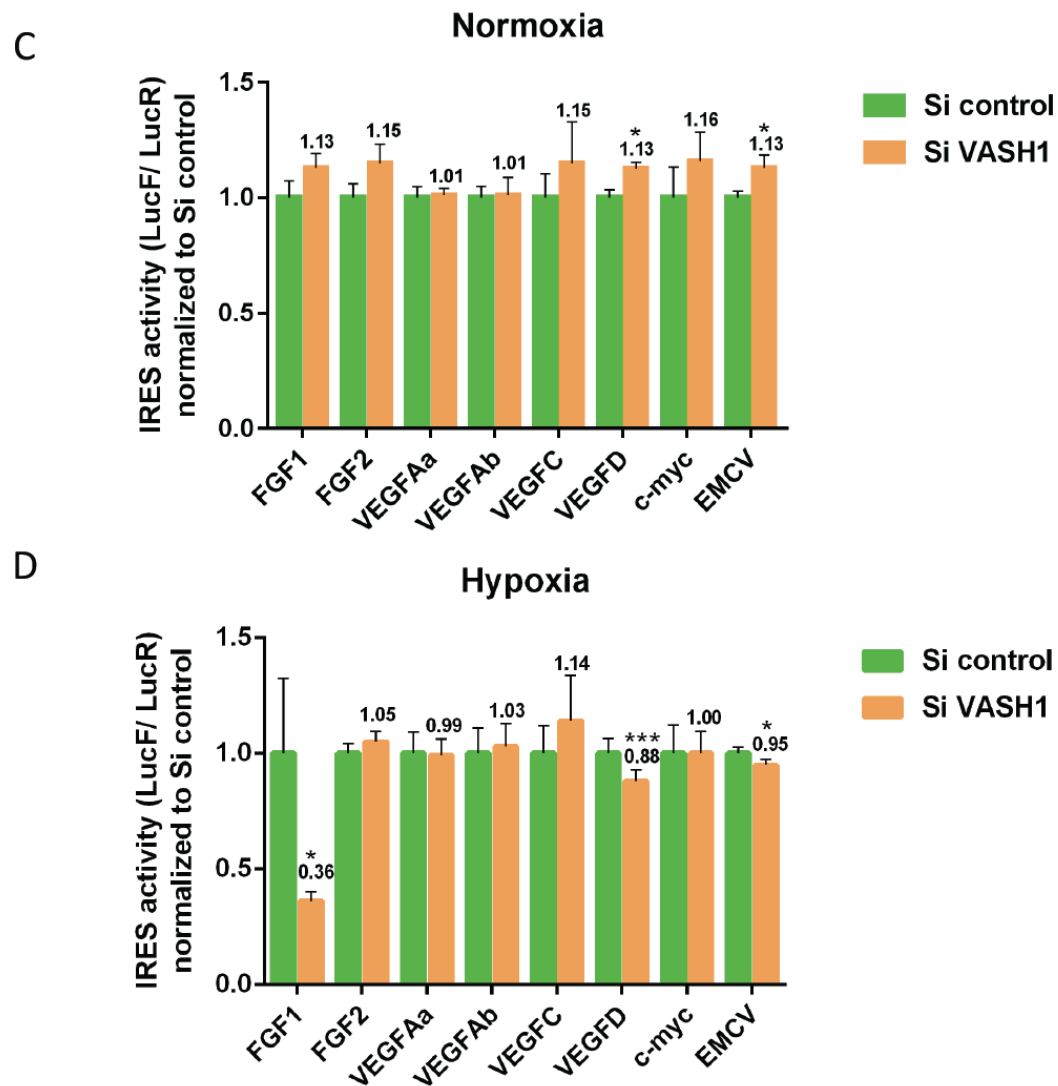

**Figure 7. Vasohibin1 is a new ITAF selectively active in early hypoxia.**

A-B VASH1 knock-down was performed in HL-1 cardiomyocytes using siRNA smartpools targeting VASH1 (siVASH1) or control (siControl). VASH1 mRNA level was measured by RT-qPCR (A) and VASH1 protein expression analyzed by capillary Simple Western method using an anti-VASH1 antibody and quantified by normalization to total proteins. The experiments have been reproduced three times and representative results are shown (B).

Knock-down experiment of VASH-1 performed on cardiomyocytes transduced by a set of IRES-containing lentivectors used in Fig. 4. After 8 h of hypoxia, IRES activities (LucF/LucR ratio) were measured in cell extracts. The IRES activity values have been normalized to the control siRNA. Histograms correspond to means  $\pm$  standard error of the mean of the mean, with a one-tailed t-test \* $p < 0.05$ , \*\*\* $p < 0.001$ , compared to siControl. For each IRES the mean of three independent experiments with three biological replicates ( $n=9$ ) is shown in normoxia (C) and hypoxia (D). All detailed values as well as standard deviations are presented in EV Table 5.

## DISCUSSION

The present study highlights the crucial role of translational control in cardiomyocyte response to hypoxia. Up to now, although a few genes had been described for their translational regulation by hypoxia, it was thought that most genes are transcriptionally regulated. Here we show that translational control, revealed by mRNA recruitment in polysomes during hypoxia, concerns the majority of the genes involved in angiogenesis and lymphangiogenesis. IRES-dependent translation appears as a key mechanism in this process, as we show that all the

Hantelys, Godet, David et al, July 2019

(lymph)angiogenic mRNAs known to contain an IRES are up-regulated. Furthermore, our data reveal that IRESs of angiogenic factor mRNAs are activated during early hypoxia, while non angiogenic mRNA IRESs are activated in late hypoxia. We have identified an angiogenesis- and stress-related protein, vasohibin1, as a new ITAF responsible for the activation of several, but not all IRESs, in early hypoxia.

### **Translational control in tumoral versus non tumoral hypoxia.**

Most studies of gene expression in response to stress have been performed at the transcriptome level in tumoral cells of different origins, whereas the present study is focused on cardiomyocytes. HL-1 cardiomyocytes are immortalized but still exhibit the beating phenotype (21). Thus this cell model, although not perfectly mimicking the cardiomyocyte behavior *in vivo*, is still close to a physiological state. The strong translational response to hypoxia revealed by our data, that differs from the transcriptional response usually observed in tumor cells, may reflect mechanisms occurring in cells that are not engaged into the cell transformation process leading to cancer, or at least not too far. Indeed, HL-1 cells respond to hypoxia very early, whereas various murine or human tumor cell lines described in other reports require a longer time of hypoxia for IRES-dependent translation to be stimulated. In human breast cancer BT474 cells, VEGFA, HIF and EMCV IRESs are all activated after 24h of hypoxia (29). In murine 4T1 and LLC cells (breast and lung tumor, respectively) as well as in human CAPAN-1 pancreatic adenocarcinoma, the VEGFA and VEGFC IRESs are activated after 24 hours of hypoxia whereas the EMCV IRES is not activated (2). The same observation of late activation in 4T1 cells has been made for the FGF1 IRES, while this IRES is activated in early hypoxia in HL-1 cardiomyocytes (Godet AC & Prats AC, unpublished data)(Fig. 4). Also, the VEGFD IRES is differently regulated in HL-1 cardiomyocytes compared to 4T1 tumor cells: only heat shock, but not hypoxia, is able to activate this IRES in 4T1 cells, whereas it is activated by hypoxia in HL-1 cardiomyocytes (Fig. 4)(13). These observations suggest that many tumoral cell lines developing resistance to hypoxia are not able to govern subtle regulations of gene expression such as the waves of IRES regulation observed in HL-1 cells.

### **VASH1, an ITAF of early hypoxia.**

We also consider the hypothesis that the important process of translational regulation observed in our study may be cardiomyocyte-specific. In such a case, IRES-dependent translation would depend on cell type specific ITAFs as well as the early response to hypoxia. These results are of great importance in regard to the acute stress response in ischemic heart that is necessary for recovery. In contrast, a delayed chronic response is known to be deleterious for heart healing (30). In agreement with this hypothesis, VASH1 expression is cell-type specific: described up to now as endothelial-specific, this protein is not expressed in tumoral cells (27). In the present study, we show that this cell-type specificity extends to cardiomyocytes. Consistent with our data, this protein has been described as a key actor of striated muscle angio-adaptation (31). VASH1 may thus have a role in the early hypoxic response in a limited number of cell types. The ITAF role of VASH1 identified here is physiologically relevant if one considers the VASH1 function in angiogenesis and stress tolerance (28). According to previous reports, VASH1 is induced during angiogenesis in endothelial cells and halts this process, while its overexpression also renders the same cells resistant to senescence and cell death induced by stress (28). Furthermore, it has been reported that VASH1 is induced after 3 hours of cell stress at the protein level but not at the transcriptional level in endothelial cells (32). This is in agreement with our observation in cardiomyocytes where VASH1, although downregulated in the transcriptome in early hypoxia, is more efficiently recruited in polysomes at the same time (Fig. 6).

It is noteworthy that VASH1 itself seems to be induced translationally by stress (Fig. 6) (32). In endothelial cells, Myashita et al report that the protein HuR upregulates VASH1 by binding to its mRNA. HuR may bind to an AU-rich element present in the 3' untranslated region of the

Hantelys, Godet, David et al, July 2019

VASH1 mRNA. However, in other studies, HuR has also been described as an ITAF, thus it is possible that VASH1 itself may be induced by an IRES-dependent mechanism (10, 33, 34).

The anti-angiogenic function of VASH1 may appear inconsistent with its ability to activate the IRES of an angiogenic factor. However, our data also suggest that VASH1 might be an activator or an inhibitor for (lymph)angiogenic factor mRNA translation. Such a double role may explain the unique dual ability of VASH1 to inhibit angiogenesis and to promote endothelial cell survival (28, 32). This could result from the existence of different VASH1 isoforms of 44 kDa, 42 kDa, 36 kDa, 32 kDa and 27 kDa, resulting from alternative splicing and/protein processing (31, 35-37). Interestingly p42 and p27 are the main isoforms expressed in heart, while the p44 is undetectable (31, 37). One can expect that the ITAF function is carried by p42 which contains the two predicted RNA binding domains (Fig.5C, EV Fig. 4). VASH1 has been observed in both the nucleus and the cytoplasm, and no striking nucleocytoplasmic relocalization is visible in response to hypoxia, in contrast to other ITAFs such as hnRNPA1 or nucleolin which shuttle to cytoplasm upon stress (10, 13, 15, 38, 39). Interestingly, VASH1, appears as foci whose size increases in hypoxia, suggesting that it could be partly translocated to stress granules. This translocation has been reported for other ITAFs such as hnRNPA1 and polypyrimidine tract binding protein (PTB)(10, 40, 41).

### **VASH1 regulates several, but not all IRESs.**

Although all IRESs of (lymph)angiogenic factor mRNAs are activated in early hypoxia, only FGF1 and VEGFD IRESs are regulated by VASH1. This suggests that other ITAFs are involved in activation of FGF2, VEGFA and VEGFC IRESs. Furthermore, the knock-down of VASH1 only partially silenced FGF1 and VEGFD IRES activities. This could result from the moderate efficiency of the knock-down, due to the strong stability of VASH1 protein, but it also suggests that VASH1 acts with other partners in the IRESome. The double role of VASH1 as an activator or an inhibitor of IRES activity in hypoxia or in normoxia, respectively, also favors the hypothesis that VASH1 interacts with different partners in the IRESome. Thus, our study shows that IRESs of (lymph)angiogenic growth factor mRNAs, although they are all activated in early hypoxia, are regulated by different IRESome complexes whose composition is still to be discovered.

## **MATERIALS & METHODS**

### ***Lentivector construction and production***

Bicistronic lentivectors coding for the *renilla* luciferase (LucR) and the stabilized firefly luciferase Luc+ (called LucF in the text) were constructed from the dual luciferase lentivectors described previously, which contained Luc2CP (2, 13). The LucR gene used here is a modified version of LucR where all the predicted splice donor sites have been mutated (sequence is available upon request). The cDNA sequences of the human FGF1, -2, VEGFA, -C, -D, c-myc and EMCV IRESs were introduced between the first (LucR) and the second cistron (LucF) (19, 42, 43). IRES sequences sizes are : 430 nt (FGF1), 480nt (FGF2), 302 nt (VEGFaA), 485 nt (VEGFaB), 419 nt (VEGFc), 507 nt (VEGFD), 363 nt (c-myc), 640 nt (EMCV)(2, 13, 16, 17, 19, 42). The two IRESs of the VEGFA have been used and are called VEGFAa and VEGFAb, respectively (16). The expression cassettes were inserted into the SIN lentivector pTRIP-DU3-CMV-MCS vector described previously (43). All cassettes are under the control of the cytomegalovirus (CMV) promoter.

Lentivector particles were produced using the CaCl<sub>2</sub> method-based by tri-transfection with the plasmids pLvPack and pLvVSVg, CaCl<sub>2</sub> and Hepes Buffered Saline (Sigma-Aldrich, Saint-Quentin-Fallavier, France), into HEK-293FT cells. Viral supernatants were harvested 48 hours after transfection, passed through 0.45 µm PVDF filters (Dominique Dutscher SAS, Brumath, France) and stored in aliquots at -80°C until use. Viral production titers were assessed on

Hantelys, Godet, David et al, July 2019

HT1080 cells with serial dilutions and scored for GFP expression by flow cytometry analysis on a BD FACSVerse (BD Biosciences, Le Pont de Claix, France).

### ***Cell culture, transfection and transduction***

HEK-293FT cells and HT1080 cells were cultured in DMEM-GlutaMAX + Pyruvate (Life Technologies SAS, Saint-Aubin, France), supplemented with 10% fetal bovine serum (FBS), and MEM essential and non-essential amino acids (Sigma-Aldrich).

Mouse atrial HL-1 cardiomyocytes were a kind gift from Dr. William Claycomb (Department of Biochemistry & Molecular Biology, School of Medicine, New Orleans) (21). HL-1 cells were cultured in Claycomb medium containing 10% FBS, Penicillin/Streptomycin (100U/mL-100µg/mL), 0.1mM norepinephrine, and 2mM L-Glutamine. Cell culture flasks were pre-coated with a solution of 0.5% fibronectin and 0.02% gelatin 1h at 37°C (Sigma-Aldrich). To keep HL-1 phenotype, cell culture was maintained as previously described (21).

For hypoxia, cells were incubated at 37°C at 1%O<sub>2</sub>.

HL-1 cardiomyocytes were transfected by siRNAs as follows: one day after being plated, cells were transfected with 10 nM of small interference RNAs from Dharmacon Acell SMARTpool targeting VASH1 (siVASH1) or non-targeting siRNA control (siControl), using Lipofectamine RNAiMax (Invitrogen) according to the manufacturer's recommendations, in a media without penicillin-streptomycin and norepinephrine. Cells were incubated 72h at 37°C with siRNA (siRNA sequences are provided in EV Table 6).

For lentivector transduction, 6.10<sup>4</sup> HL-1 cells were plated into each well of a 6-well plate and transduced overnight in 1 mL of transduction medium (OptiMEM-GlutaMAX, Life Technologies SAS) containing 5 µg/mL protamine sulfate in the presence of lentivectors (MOI 2). GFP-positive cells were quantified 48h later by flow cytometry analysis on a BD FACSVerse (BD Biosciences). HL-1 cells were transduced with an 80% efficiency. siRNA treatment on transduced cells was performed 72h after transduction (and after one cell passage). To achieve protein half-life measurement, HL-1 cardiomyocytes were treated with cycloheximide (InSolution CalBioChem) diluted in PBS at a final concentration of 10 µg/mL in well plates. Time-course points were taken by stopping cell cultures after 0h, 4h, 6h 8h 16h or 24h of incubation and subsequent capillary Western analysis of cell extracts.

### ***Reporter activity assay***

For reporter lentivectors, luciferase activities *in vitro* and *in vivo* were performed using Dual-Luciferase Reporter Assay (Promega, Charbonnières-les-Bains, France). Briefly, proteins from HL-1 cells were extracted with Passive Lysis Buffer (Promega France). Quantification of bioluminescence was performed with a luminometer (Centro LB960, Berthold, Thoiry, France).

### ***Capillary electrophoresis***

Diluted protein lysate was mixed with fluorescent master mix and heated at 95°C for 5 minutes. 3 µL of protein mix containing Protein Normalization Reagent, blocking reagent, wash buffer, target primary antibody (mouse anti-VASH-1 Abcam EPR17420 diluted 1:100; mouse anti-FGF1 Abcam EPR19989 diluted 1:25; mouse anti-P21 Santa Cruz sc-6546 (F5) diluted 1:10; rabbit anti-eIF2α Cell Signaling Technology 9721 diluted 1:50; mouse anti-phospho-eIF2α Cell Signaling Technology 2103 diluted 1:50; rabbit anti-4EBP-1 Cell Signaling Technology 9452 diluted 1:50; rabbit anti-phospho-4EBP-1 Cell Signaling Technology 9451 diluted 1:50), secondary-HRP (ready to use rabbit "detection module", DM-001), and chemiluminescent substrate were dispensed into designated wells in a manufacturer provided microplate. The plate was loaded into the instrument (Jess, Protein Simple) and proteins were drawn into individual capillaries on a 25 capillary cassette (12-230kDa)(SM-SW001). Data were analyzed on compass software provided by the manufacturer.



Hantelys, Godet, David et al, July 2019

### ***RNA purification and cDNA synthesis***

Total RNA extraction from HL-1 cells was performed using TRIzol reagent according to the manufacturer's instructions (Gibco BRL, Life Technologies, NY, USA). RNA quality and quantification were assessed by a Xpose spectrophotometer (Trinean, Gentbrugge, Belgium). RNA integrity was verified with an automated electrophoresis system (Fragment Analyzer, Advanced Analytical Technologies, Paris, France).

500 ng RNA was used to synthesize cDNA using a High-Capacity cDNA Reverse Transcription Kit (Applied Biosystems, Villebon-sur-Yvette, France). Appropriate no-reverse transcription and no-template controls were included in the PCR array plate to monitor potential reagent or genomic DNA contaminations, respectively. The resulting cDNA was diluted 10 times in nuclease-free water. All reactions for the PCR array were run in biological triplicates.

### ***qPCR array***

The DELTAgene Assay™ was designed by Fluidigm Corporation (San Francisco, USA). The qPCR-array was performed on BioMark with the Fluidigm 96.96 Dynamic Array following the manufacturer's protocol (Real-Time PCR Analysis User Guide PN 68000088). The list of primers is provided in EV Table 6. A total of 1.25 ng of cDNA was preamplified using PreAmp Master Mix (Fluidigm, PN 100-5580, 100-5581, San Francisco, USA) in the plate thermal cycler at 95°C for 2 min, 10 cycles at 95°C for 15sec and 60°C for 4 min. The preamplified cDNA was treated by endonuclease I (New England BioLabs, PN M0293L, Massachusetts, USA) to remove unincorporated primers.

The preamplified cDNA was mixed with 2x SsoFast EvaGreen Supermix (BioRad, PN 172-5211, California, USA), 50 µM of mixed forward and reverse primers and sample Loading Reagent (Fluidigm, San Francisco, USA). The sample was loaded into the Dynamic Array 96.96 chip (Fluidigm San Francisco, USA). The qPCR reactions were performed in the BioMark RT-qPCR system. Data was analyzed using the BioMark RT-qPCR Analysis Software Version 2.0.

18S rRNA was used as a reference gene and all data were normalized based on 18S rRNA level. Hprt was also assessed as a second reference gene but was not selected as its level was not stable during hypoxia. Relative quantification (RQ) of gene expression was calculated using the  $2^{-\Delta\Delta CT}$  method. When the RQ value was inferior to 1, the fold change was expressed as  $-1/RQ$ . The oligonucleotide primers used are detailed in EV Table 6.

### ***Polysomal RNA preparation***

HL-1 cells were cultured in 150-mm dishes. 15 min prior to harvesting, cells were treated by cycloheximide at 100 µg/ml. Cells were washed three times in PBS cold containing 100 µg/mL cycloheximide and scraped in the PBS/cycloheximide. After centrifugation at 3,000 rpm for 2 min at 4°C, cells were lysed by 450µl hypotonic lysis buffer (5 mM Tris-HCL, pH7.5 ; 2.5 mM MgCl<sub>2</sub> ; 1.5 mM KCl). Cells were centrifuged at 13,000 rpm for 5 min at 4°C, the supernatants were collected and loaded onto a 10-50% sucrose gradient. The gradients were centrifuged in a Beckman SW40Ti rotor at 39,000 rpm for 2.5 h at 4°C without brake. Fractions were collected using a Foxy JR ISCO collector and UV optical unit type 11. RNA was purified from pooled heavy fractions containing polysomes (fractions 19-27), as well as from cell lysate before gradient loading.

### ***Preparation of biotinylated RNA***

The FGF1, VEGFA or EMCV IRESs was cloned in pSCB-A-amp/kan plasmid (Agilent) downstream from the T7 sequence. The plasmid were linearized and *in vitro* transcription was performed with MEGAscript T7 kit (Ambion), according to the manufacturer's protocol, in the



Hantelys, Godet, David et al, July 2019

presence of Biotin-16-UTP at 1 mM (Roche), as previously described (26). The synthesized RNA was purified using RNeasy kit (Qiagen).

### ***BIA-MS experiments***

BIA-MS studies based on surface plasmonic resonance (SPR) technology were performed on BIAcore T200 optical biosensor instrument (GE Healthcare), as described previously (13, 26). Immobilization of biotinylated IRES RNAs was performed on a streptavidin-coated (SA) sensorchip in HBS-EP buffer (10 mM Hepes pH 7.4, 150 mM NaCl, 3 mM EDTA, 0.005% surfactant P20) (GE Healthcare). All immobilization steps were performed at a flow rate of 2  $\mu$ l/min with a final concentration of 100  $\mu$ g/ml.

Binding analyses were performed with normoxic or hypoxic cell protein extracts at 100  $\mu$ g/ml over the immobilized IRES RNA surface for 120 sec at a flow rate of 30  $\mu$ l/min. The channel (Fc1) was used as a reference surface for non-specific binding measurements. The recovery wizard was used to recover selected proteins from cell protein extracts. This step was carried out with 0.1% SDS. Five recovery procedures were performed to get enough amounts of proteins for MS identification.

Eluted protein samples from BIA experiment were digested *in gel* with 1  $\mu$ g of trypsin (sequence grade, Promega) at 37°C OVN. Peptides were then subjected to LC-MS/MS analysis. The peptides mixtures were loaded on a YMC-Triart C18 150x300  $\mu$ m capillary column (particle diameter 3  $\mu$ m) connected to a RS3000 Dionex HPLC system. The run length gradient (acetonitrile and water) was 30 minutes. Then, on the AB Sciex 5600+ mass spectrometer, data were acquired with a data dependent analysis. Data were then loaded on Mascot software (Matrix Science) that attributes peptide interpretations to MS/MS recorded scans. The higher the score, the lower the probability of false positive (a score of 20 corresponds to a 5% probability of false positive).

### ***Surface Plasmon Resonance assays.***

For kinetic analysis, immobilization of biotinylated FGF1 IRES RNA was performed on a streptavidin-coated (SA) sensorchip in HBS-EP buffer (10 mM Hepes pH 7.4, 150 mM NaCl, 3mM EDTA, 0.005% surfactant P20) (GE Healthcare). Immobilization step was performed at a flow rate of 2  $\mu$ l/min with a final concentration of 100  $\mu$ g/ml. Total amount of immobilized FGF1 IRES RNA was 1500 RU.

Binding analyses were performed with recombinant protein VASH1 (Abnova H00022846-P01) at 100  $\mu$ g/ml over the immobilized FGF1. This recombinant VASH1 contains the 27 kDa N-terminal part of the protein coupled to glutathione S-transferase. The channel (Fc1) was used as a reference surface for non-specific binding measurements.

A Single-Cycle Kinetics (SCK) analysis to determine association, dissociation and affinity constants ( $k_a$ ,  $k_d$ , and  $KD$  respectively) was carried out by injecting different protein concentrations (16.25 nM-300 nM). Binding parameters were obtained by fitting the overlaid sensorgrams with the 1:1. Langmuir binding model of the BIAevaluation software version 3.0.

### ***Immunocytology***

Cells were plated on glass coverslip and incubated for 4 h of normoxia or hypoxia. They were fixed with cold methanol at -20°C during 5 min, washed 3 times with PBS and permeabilized 1 min with 0.1% Triton. Then, cells were incubated 5 min with blocking solution (1% FBS, 0.5% BSA) and 30 min with anti-VASH1 antibody (1/50; abcam ab176114) and Alexa 488 conjugated anti-mouse secondary antibody. Images were acquired with LSM780 Zeiss confocal microscope, camera lens x60 with Z acquisition of 0.36  $\mu$ m. A single plan is shown Fig. 6C.

Imaris software was used to represent vasohibin staining in Figure 6C. To differentiate vasohibin in the nucleus and cytoplasm, nucleus was delimited with Dapi staining and all Vasohibin foci in the nucleus are shown in purple and in the cytoplasm in green.

**Hantelys, Godet, David et al, July 2019**

Using imaris software, the mean of vasohibin foci was counted and the volume of vasohibin foci was quantified, a threshold was applied and all particles above 0,5  $\mu\text{m}^3$  was selected and quantified.

### ***Statistical analysis***

All statistical analyses were performed using one-way Anova with Tukey's comparisons test or one-tailed Student's t-test and are expressed as mean +- standard deviation, \* $p < 0.05$ , \*\* $p < 0.01$ , \*\*\* $p < 0.001$ , \*\*\*\* $p < 0.0001$ .

### **ACKNOWLEDGMENTS**

Our thanks go to J.J. Maoret and F. Martin from the Inserm UMR1048 GeT-TQ plateau of the GeT platform Genotoul (Toulouse), F. Lopez and L. Tonini from the proteomic platform genotoul (Toulouse), J. Iacovoni from the Inserm UMR 1048 bioinformatics plateau, as well as L. van den Berghe and C. Segura from the Inserm UMR1037 vectorology plateau (Toulouse) and A. Lucas from the We-Met Functional Biochemistry Facility (Toulouse). We also thank V. Poinot for helpful discussion and W. Claycomb for providing HL-1 cells.

This work was supported by Région Midi-Pyrénées, Association Française contre les Myopathies (AFM-Téléthon), Association pour la Recherche sur le Cancer (ARC), European funding (REFBIO), Fondation Toulouse Cancer Santé and Agence Nationale pour la Recherche AAPG2018-RIBOCARD. F.H. had fellowships from the Région Midi-Pyrénées and from the Ligue Nationale Contre le Cancer (LNCC). E.R.G. had a fellowship from AFM-Telethon. A.C. Godet had a fellowship from LNCC.

### **EXPANDED VIEW MATERIAL**

EV Figure 1, 2 and 3, 4, 5, EV Tables 1, 2, 3, 4, 5, 6, 7

### **REFERENCES**

1. Pouyssegur J, Dayan F, Mazure NM. Hypoxia signalling in cancer and approaches to enforce tumour regression. *Nature*. 2006;441(7092):437-43.
2. Morfoisse F, Kuchnio A, Frainay C, Gomez-Brouchet A, Delisle MB, Marzi S, et al. Hypoxia induces VEGF-C expression in metastatic tumor cells via a HIF-1 $\alpha$ -independent translation-mediated mechanism. *Cell Rep*. 2014;6(1):155-67.
3. Holcik M, Sonenberg N. Translational control in stress and apoptosis. *Nat Rev Mol Cell Biol*. 2005;6(4):318-27.
4. Forsythe JA, Jiang BH, Iyer NV, Agani F, Leung SW, Koos RD, et al. Activation of vascular endothelial growth factor gene transcription by hypoxia-inducible factor 1. *Mol Cell Biol*. 1996;16(9):4604-13.
5. Pages G, Pouyssegur J. Transcriptional regulation of the Vascular Endothelial Growth Factor gene--a concert of activating factors. *Cardiovasc Res*. 2005;65(3):564-73.
6. Conte C, Riant E, Toutain C, Pujol F, Arnal JF, Lenfant F, et al. FGF2 translationally induced by hypoxia is involved in negative and positive feedback loops with HIF-1 $\alpha$ . *PLoS One*. 2008;3(8):e3078.
7. Baird SD, Turcotte M, Korneluk RG, Holcik M. Searching for IRES. *RNA*. 2006;12(10):1755-85.
8. Spriggs KA, Stoneley M, Bushell M, Willis AE. Re-programming of translation following cell stress allows IRES-mediated translation to predominate. *Biol Cell*. 2008;100(1):27-38.
9. Faye MD, Holcik M. The role of IRES trans-acting factors in carcinogenesis. *Biochim Biophys Acta*. 2015;1849(7):887-97.

**Hantelys, Godet, David et al, July 2019**

10. Godet AC, David F, Hantelys F, Tatin F, Lacazette E, Garmy-Susini B, et al. IRES Trans-Acting Factors, Key Actors of the Stress Response. *Int J Mol Sci.* 2019;20(4).
11. Liberman N, Gandin V, Svitkin YV, David M, Virgili G, Jaramillo M, et al. DAP5 associates with eIF2beta and eIF4AI to promote Internal Ribosome Entry Site driven translation. *Nucleic Acids Res.* 2015;43(7):3764-75.
12. Mitchell SA, Spriggs KA, Coldwell MJ, Jackson RJ, Willis AE. The Apaf-1 internal ribosome entry segment attains the correct structural conformation for function via interactions with PTB and unr. *Mol Cell.* 2003;11(3):757-71.
13. Morfoisse F, Tatin F, Hantelys F, Adoue A, Helfer AC, Cassant-Sourdy S, et al. Nucleolin Promotes Heat Shock-Associated Translation of VEGF-D to Promote Tumor Lymphangiogenesis. *Cancer Res.* 2016;76(15):4394-405.
14. Lewis SM, Holcik M. For IRES trans-acting factors, it is all about location. *Oncogene.* 2008;27(8):1033-5.
15. Lewis SM, Veyrier A, Hosszu Ungureanu N, Bonnal S, Vagner S, Holcik M. Subcellular relocalization of a trans-acting factor regulates XIAP IRES-dependent translation. *Mol Biol Cell.* 2007;18(4):1302-11.
16. Huez I, Creancier L, Audigier S, Gensac MC, Prats AC, Prats H. Two independent internal ribosome entry sites are involved in translation initiation of vascular endothelial growth factor mRNA. *Mol Cell Biol.* 1998;18(11):6178-90.
17. Martineau Y, Le Bec C, Monbrun L, Allo V, Chiu IM, Danos O, et al. Internal ribosome entry site structural motifs conserved among mammalian fibroblast growth factor 1 alternatively spliced mRNAs. *Mol Cell Biol.* 2004;24(17):7622-35.
18. Stein I, Itin A, Einat P, Skalter R, Grossman Z, Keshet E. Translation of vascular endothelial growth factor mRNA by internal ribosome entry: implications for translation under hypoxia. *Mol Cell Biol.* 1998;18(6):3112-9.
19. Vagner S, Gensac MC, Maret A, Bayard F, Amalric F, Prats H, et al. Alternative translation of human fibroblast growth factor 2 mRNA occurs by internal entry of ribosomes. *Mol Cell Biol.* 1995;15(1):35-44.
20. Jain RK. Normalization of tumor vasculature: an emerging concept in antiangiogenic therapy. *Science.* 2005;307(5706):58-62.
21. Claycomb WC, Lanson NA, Jr., Stallworth BS, Egeland DB, Delcarpio JB, Bahinski A, et al. HL-1 cells: a cardiac muscle cell line that contracts and retains phenotypic characteristics of the adult cardiomyocyte. *Proc Natl Acad Sci U S A.* 1998;95(6):2979-84.
22. Kietzmann T, Roth U, Jungermann K. Induction of the plasminogen activator inhibitor-1 gene expression by mild hypoxia via a hypoxia response element binding the hypoxia-inducible factor-1 in rat hepatocytes. *Blood.* 1999;94(12):4177-85.
23. Ronkainen VP, Ronkainen JJ, Hanninen SL, Leskinen H, Ruas JL, Pereira T, et al. Hypoxia inducible factor regulates the cardiac expression and secretion of apelin. *FASEB J.* 2007;21(8):1821-30.
24. Morfoisse F, Renaud E, Hantelys F, Prats AC, Garmy-Susini B. Role of hypoxia and vascular endothelial growth factors in lymphangiogenesis. *Mol Cell Oncol.* 2015;2(4):e1024821.
25. Creancier L, Morello D, Mercier P, Prats AC. Fibroblast growth factor 2 internal ribosome entry site (IRES) activity ex vivo and in transgenic mice reveals a stringent tissue-specific regulation. *J Cell Biol.* 2000;150(1):275-81.
26. Ainaoui N, Hantelys F, Renaud-Gabardos E, Bunel M, Lopez F, Pujol F, et al. Promoter-Dependent Translation Controlled by p54nrb and hnRNPM during Myoblast Differentiation. *PLoS One.* 2015;10(9):e0136466.
27. Sato Y. The vasohibin family: Novel regulators of angiogenesis. *Vascul Pharmacol.* 2012;56(5-6):262-6.
28. Sato Y. Novel Link between Inhibition of Angiogenesis and Tolerance to Vascular Stress. *J Atheroscler Thromb.* 2015;22(4):327-34.

**Hantelys, Godet, David et al, July 2019**

29. Braunstein S, Karpisheva K, Pola C, Goldberg J, Hochman T, Yee H, et al. A hypoxia-controlled cap-dependent to cap-independent translation switch in breast cancer. *Mol Cell*. 2007;28(3):501-12.
30. Silvestre JS, Mallat Z, Tedgui A, Levy BI. Post-ischaemic neovascularization and inflammation. *Cardiovasc Res*. 2008;78(2):242-9.
31. Kishlyansky M, Vojnovic J, Roudier E, Gineste C, Decary S, Forn P, et al. Striated muscle angio-adaptation requires changes in Vasohibin-1 expression pattern. *Biochem Biophys Res Commun*. 2010;399(3):359-64.
32. Miyashita H, Watanabe T, Hayashi H, Suzuki Y, Nakamura T, Ito S, et al. Angiogenesis inhibitor vasohibin-1 enhances stress resistance of endothelial cells via induction of SOD2 and SIRT1. *PLoS One*. 2012;7(10):e46459.
33. Durie D, Lewis SM, Liwak U, Kisilewicz M, Gorospe M, Holcik M. RNA-binding protein HuR mediates cytoprotection through stimulation of XIAP translation. *Oncogene*. 2011;30(12):1460-9.
34. Galban S, Kuwano Y, Pullmann R, Jr., Martindale JL, Kim HH, Lal A, et al. RNA-binding proteins HuR and PTB promote the translation of hypoxia-inducible factor 1alpha. *Mol Cell Biol*. 2008;28(1):93-107.
35. Kern J, Bauer M, Rychli K, Wojta J, Ritsch A, Gastl G, et al. Alternative splicing of vasohibin-1 generates an inhibitor of endothelial cell proliferation, migration, and capillary tube formation. *Arterioscler Thromb Vasc Biol*. 2008;28(3):478-84.
36. Sato Y. The vasohibin family: a novel family for angiogenesis regulation. *J Biochem*. 2013;153(1):5-11.
37. Sonoda H, Ohta H, Watanabe K, Yamashita H, Kimura H, Sato Y. Multiple processing forms and their biological activities of a novel angiogenesis inhibitor vasohibin. *Biochem Biophys Res Commun*. 2006;342(2):640-6.
38. Cammas A, Pileur F, Bonnal S, Lewis SM, Leveque N, Holcik M, et al. Cytoplasmic relocalization of heterogeneous nuclear ribonucleoprotein A1 controls translation initiation of specific mRNAs. *Mol Biol Cell*. 2007;18(12):5048-59.
39. Dobbryn HC, Hill K, Hamilton TL, Spriggs KA, Pickering BM, Coldwell MJ, et al. Regulation of BAG-1 IRES-mediated translation following chemotoxic stress. *Oncogene*. 2008;27(8):1167-74.
40. Borghese F, Michiels T. The leader protein of cardioviruses inhibits stress granule assembly. *J Virol*. 2011;85(18):9614-22.
41. Guil S, Long JC, Caceres JF. hnRNP A1 relocalization to the stress granules reflects a role in the stress response. *Mol Cell Biol*. 2006;26(15):5744-58.
42. Nanbru C, Lafon I, Audigier S, Gensac MC, Vagner S, Huez G, et al. Alternative translation of the proto-oncogene c-myc by an internal ribosome entry site. *J Biol Chem*. 1997;272(51):32061-6.
43. Prats AC, Van den Berghe L, Rayssac A, Ainaoui N, Morfoisse F, Pujol F, et al. CXCL4L1-fibstatin cooperation inhibits tumor angiogenesis, lymphangiogenesis and metastasis. *Microvasc Res*. 2013;89:25-33.

# Hantelys et al, EV Figure 1

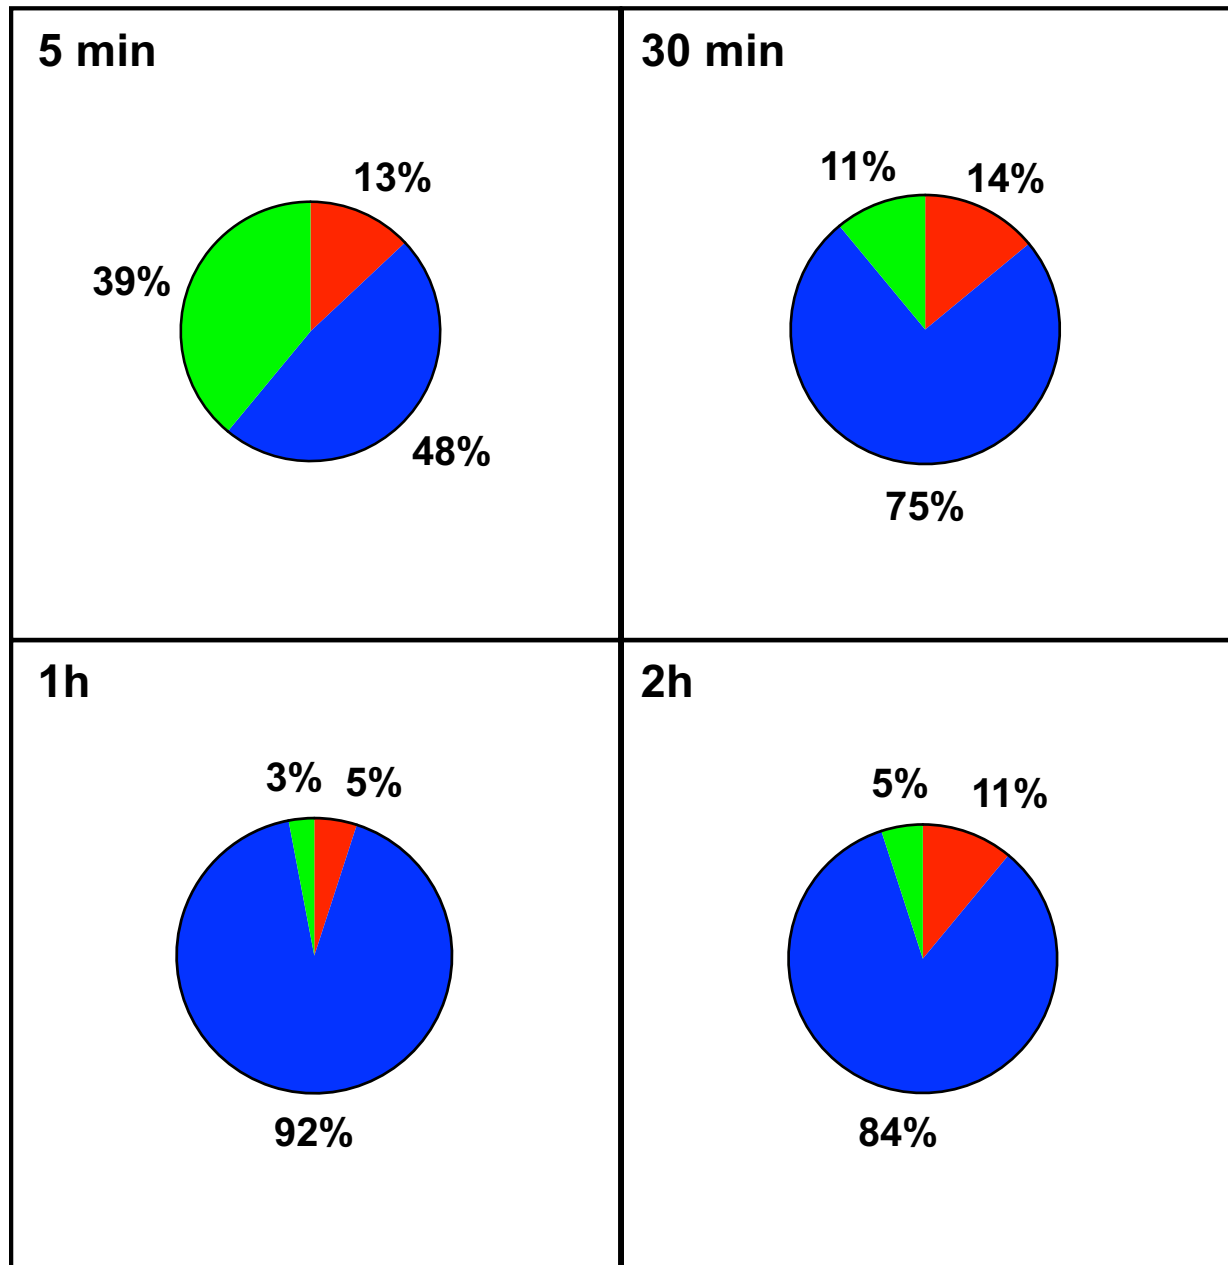

## Expanded View Figure 1. Transcriptome of IRES-containing mRNAs in hypoxic cardiomyocytes.

Total RNA was purified from HL-1 cardiomyocytes submitted to increasing times from 5 min to 24 h of hypoxia at 1% O<sub>2</sub>, as well as from normoxic cardiomyocytes as a control. cDNA was synthesized and used for a Fluidigm deltagene PCR array dedicated to genes related to (lymph)angiogenesis or stress (EV Table 6). Relative quantification (RQ) of gene expression during hypoxia was calculated using the  $2^{-\Delta\Delta CT}$  method with normalization to 18S and to normoxia. The percentage of repressed (red), induced (green) and non-regulated (blue) mRNAs is shown for the earlier times of the kinetics. The later times are shown in Fig. 1. The detailed values for all the times of the kinetics are presented in EV Table 1.

## Hantelys et al, EV Figure 2

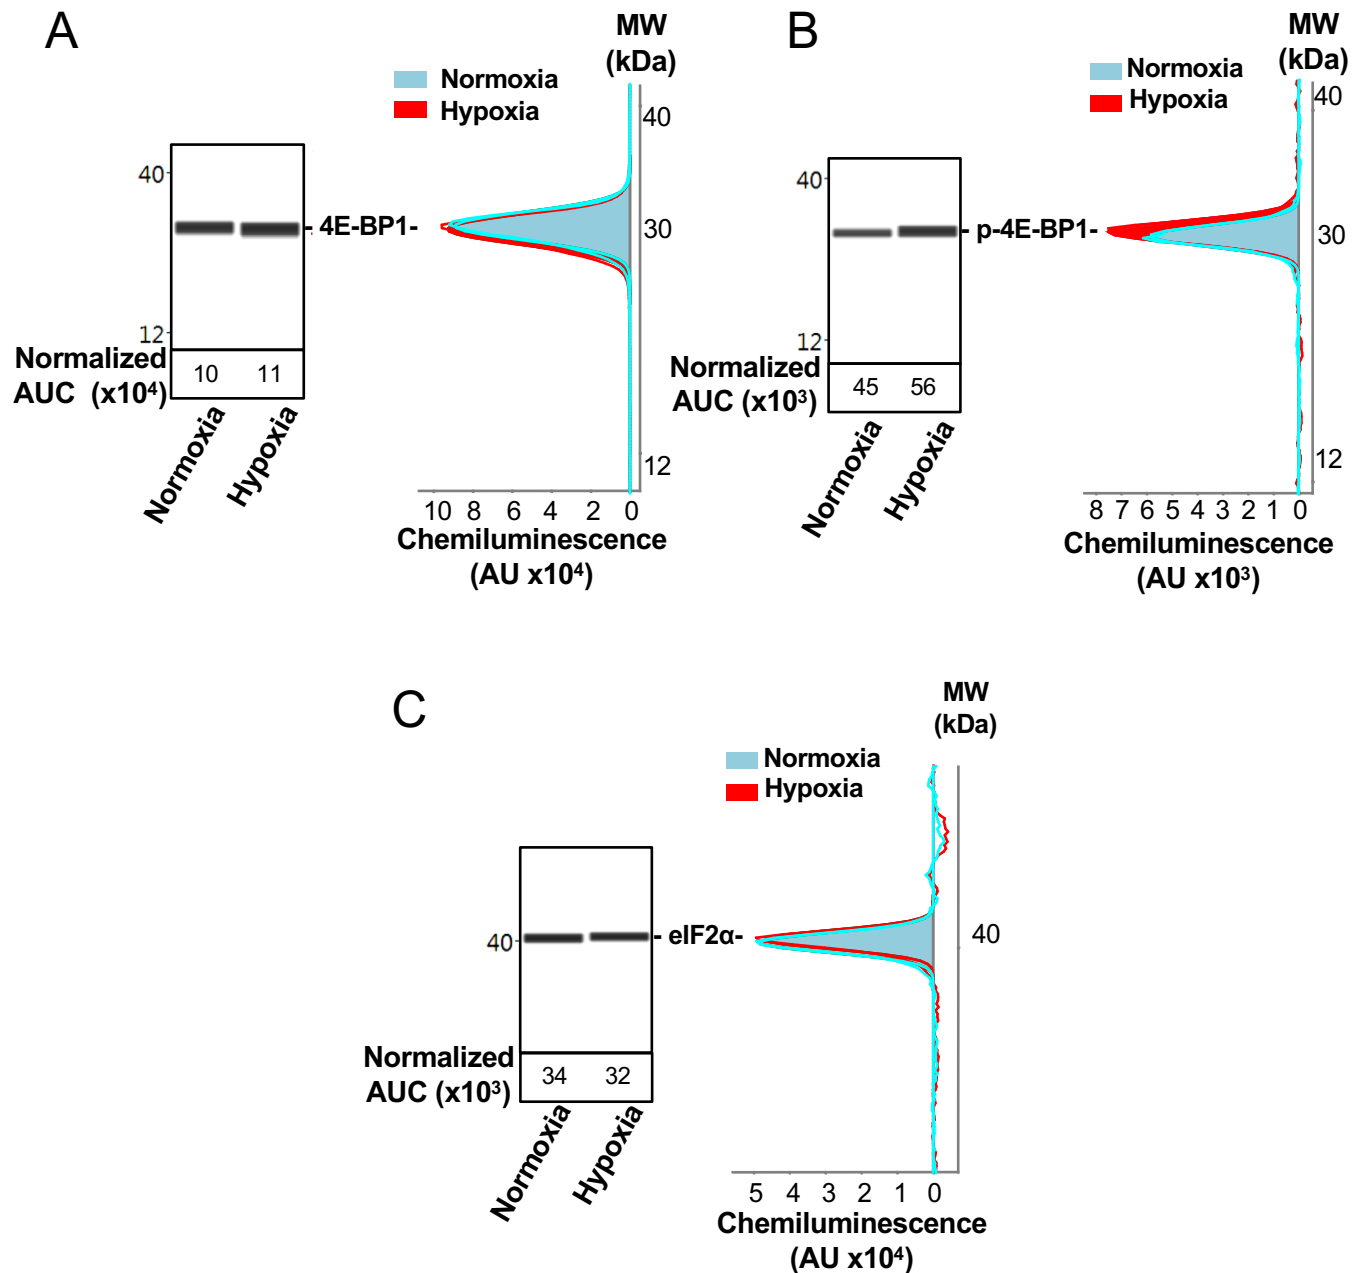

### Expanded View Figure 2. Capillary electrophoresis immunodetection of 4E-BP1 and eIF2α.

A-C 4E-BP1 expression (A) and phosphorylation (B), as well as eIF2α expression (C) in normoxia and hypoxia (8 h) were analysed and quantified by capillary Simple Western, as described in Mat. & Meth. The quantified values, expressed in arbitrary units of luminescence (AUC) are normalized to total proteins. Analysis of eIF2α phosphorylation is shown in Figure 2.



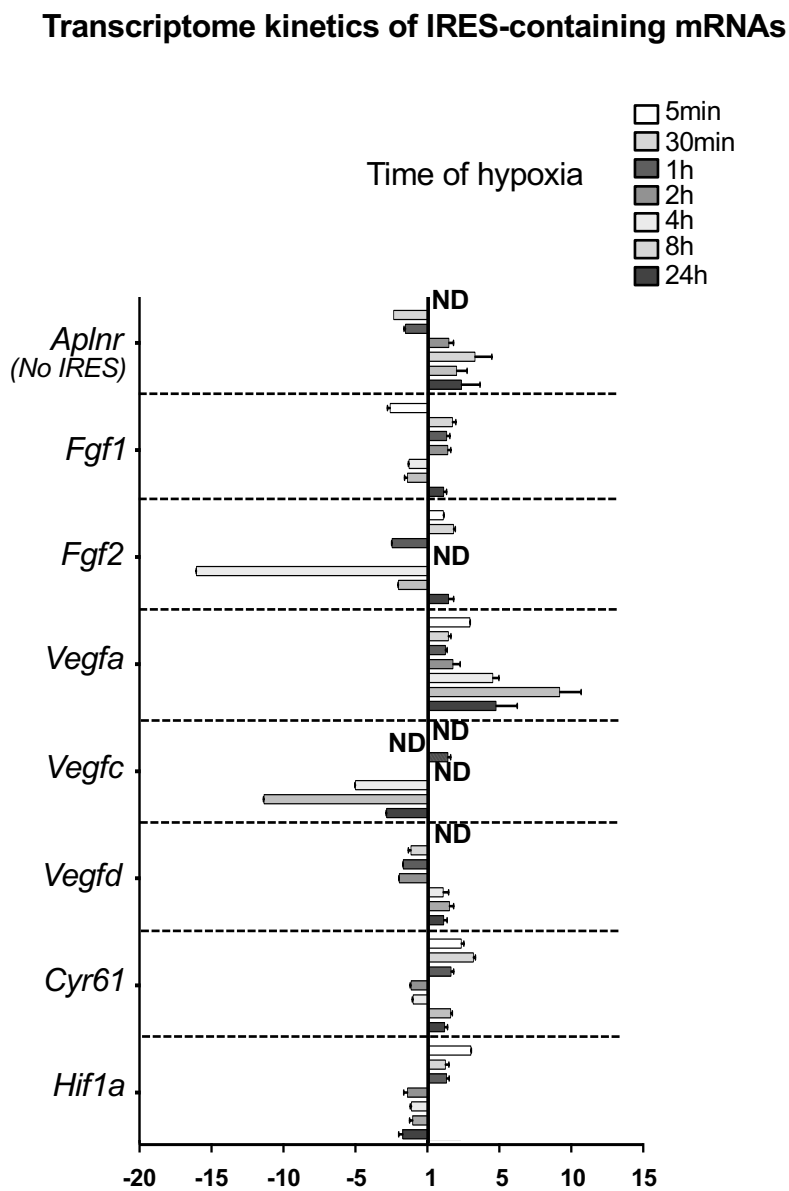

**Expanded View Figure 3. Transcriptome of IRES-containing mRNAs in hypoxic cardiomyocytes.**

RQ values for IRES-containing mRNA transcriptome kinetics extracted from the PCR arrays shown in EV Table 1. The gene *Aplnr* (apelin receptor) was chosen as a control without an IRES.

A

## Mouse vasohibin-1 (NP\_796328.2)

## BindN prediction of RNA-binding residues

## Summary

|                                  |                 |
|----------------------------------|-----------------|
| <b>Input sequence length:</b>    | 375 amino acids |
| <b>Predicted binding sites:</b>  | 125 residues    |
| <b>User-defined specificity:</b> | 80.00%          |
| <b>Estimated sensitivity:</b>    | 53.95%          |

## Overview

Sequence: MPGGKKVVPSSSSASPNAAATTTAAAAAAAAPHSGTKRLETTEGASAQRDDEEP EE E E  
Prediction: -----+-----+-----+-----+-----+-----+-----+-----+-----+-----  
Confidence: 433477326658884747523656444555433578789925666368266223446775

Sequence: EDLRDGGVPFFINRGGPLVDEATWERMWKKHVAKIHPDGEKVALRIRGATDLPKIPISVP  
Prediction: -+-----+-----+-----+-----+-----+-----+-----+-----+  
Confidence: 667677484669456552754634557525876723364552677645236367363464

Sequence: TFQPTTPVPERLEAVQRYIRELQYNHTGTQFFEIKKSRLTGLMDLAKEMTKALPIKCL  
Prediction: +---+---+---+---+---+---+---+---+---+---+---+---+---+---+---+---  
Confidence: 532325353428557424972724526324463726682357777872662265649389

Sequence: EAVILGIYLTNSMPTLERFPISFKTYFSGNYFRHIVLGVNFGGRYGALGMSRREDLMYKP  
Prediction: -----+-----+-----+-----+-----+-----+-----+-----+-----+-----  
Confidence: 699997939223644765757374345243486699979333382424626753234344

Sequence: PAFRTLSELVLDYEAAYGRCWHVLKKVKLGQCVSHDPHSVEQIEWKHSVLDVERLGRDF  
Prediction: ---+---+---+---+---+---+---+---+---+---+---+---+---+---+---+---  
Confidence: 343537459999866555683387228552656444533953856655886947447524

```
Sequence: RKELERHARDMLRKIGKGTGPPSPTKDRKKDVSSPQRAQSSPHRRNSRSERRPSGEKKPA
Prediction: ++---+---++-+-+-----+++++++-----+++++++-----+++++++-----
Confidence: 7635273673577543829699999978987487579589998999999988688863
```

```
Sequence:  EPKAMPDLGGYQIRV
Prediction: +-+-----+---+-
Confidence: 524654575542878
```

\*\*\* Prediction: binding residues are labeled with '+' and in red;  
non-binding residues labeled with '-' and in green.  
\*\*\* Confidence: from level 0 (lowest) to level 9 (highest).

# B

**Human vasohibin-1 (NP\_055724.1)**

## BindN prediction of RNA-binding residues

## Summary

|                           |                 |
|---------------------------|-----------------|
| Input sequence length:    | 365 amino acids |
| Predicted binding sites:  | 125 residues    |
| User-defined specificity: | 80.00%          |
| Estimated sensitivity:    | 53.95%          |

## Overview

```
Sequence: MPGGKKVAGGSSSATPTSAAATAPSGVRRLETSEGTSAQRDEEFEEEEEDLRDGGVPF
Prediction: -----+--+-----+--+-----+--+-----+--+-----+-----+-----+
Confidence: 433377357259987857824564685498326672885774234467756676774846
```

```

sequence: FVNRGGLPVDEATWERMWKHVAKIHPDGEKVAQRIRGATDLPKIPISVPTFQSPSTPVPE
rediction: - - - - - - - - - - - - - - - - - - - - - - - - - - - - - - - -
confidence: 6945655275463455752587672336444326574323636736364645323262434

```

```
Sequence: RLEAVQRYIRELQYNHTGTQFFEIKKSRPLTGLMDLAKEMTKALPIKCLEAVILGIYLT  
Prediction: -----+-----++-+-+-----+++-----  
Confidence: 285574249727245263244637266823577778726622656493896999979392
```

```

sequence: NSMPTLERFPISFKTYFSGNYFRHIVLGVNFAGRYGALGMSRREDLMYKPPAFRTLSELV
rediction: -----+-----+-----+-----+-----+-----+-----+-----+-----
confidence: 236447657573743452434866999793353735246267532343443435374599

```

```

sequence: LDFEAAAYGRCWHLKKVKLGQSVSHDPHSVEQIEWKHSVLDVERLGRDDFRKELERHARD
prediction:  - - - - - + + + + - - - - - + + + + - - - - - + + + + - - - - -
confidence: 99976656833872285347445334339538566558869474474247635273673

```

```
'equence: MRLKIGKGTPPSPTKDRKKDVSSPQRAQSSPHRNSRSERRPSGDKKTSEPKAMPDLNG
'prediction: -+--+-----++-+++++++-----+++++++-----+++++++-----+++++++-----
'confidence: 5775438296999999789874875795899899999999888989876576554725
```

```

sequence:      YQIRV
rediction:     ----+--
confidence:    22778

```

**Expanded View Figure 4. Conservation of predicted RNA binding domains in mouse and human vasohibin-1.**

A-B RNA binding domains in mouse (A) and human (B) VASH1 proteins were predicted using BindN software (<https://omictools.com/bindn-2-tool>)

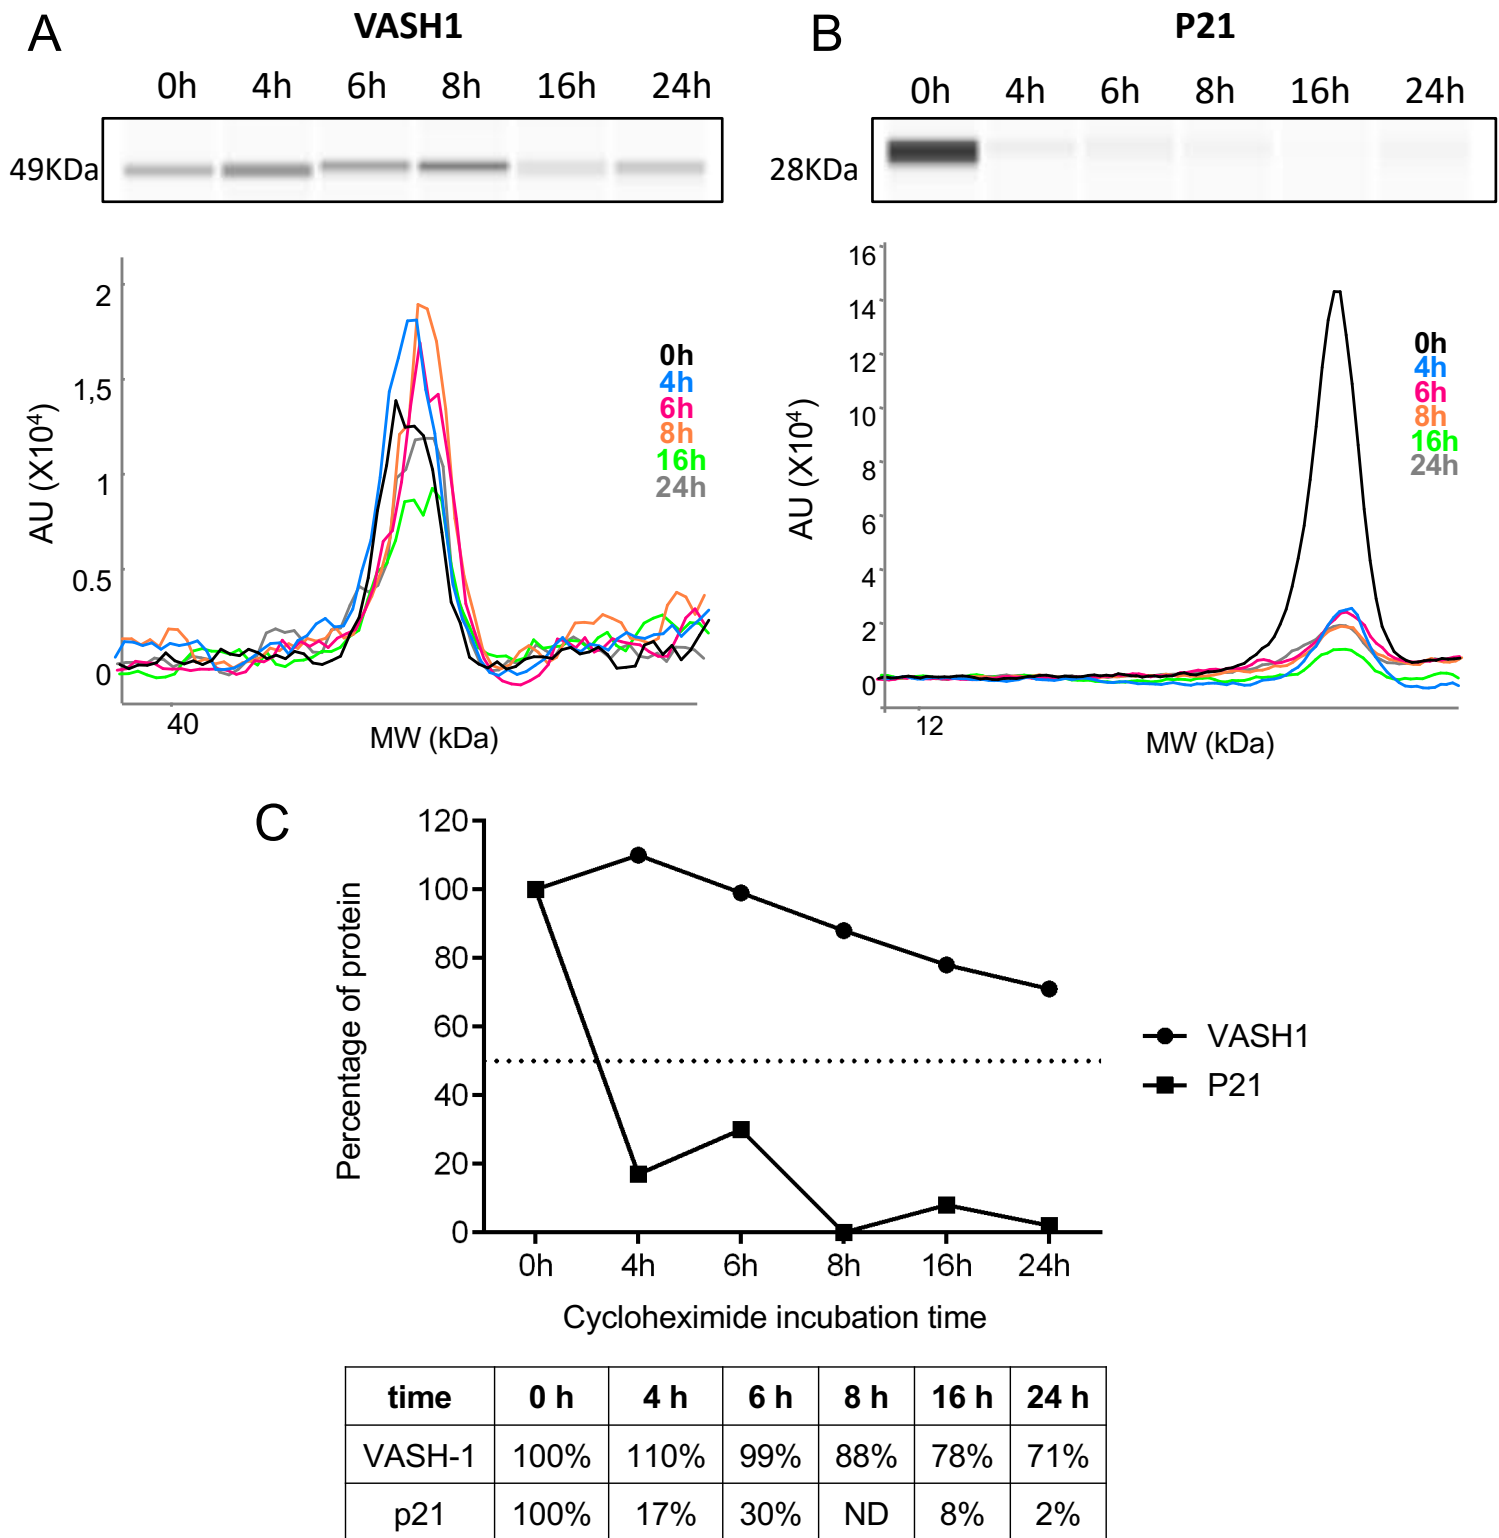

### Expanded View Figure 5. VASH1 half life is superior to 24h.

A-C VASH1 half-life determination experiment were performed by blocking protein synthesis with cycloheximide at 10 µg/mL, with time-course points at 0 h, 4 h, 6 h, 8 h, 16 h and 24 h. VASH1 (A) and P21 (B) protein stability was measured by capillary Simple Western with normalization to 0 h time-course point. P21 was used as a control for its short half-life (C).

# Hantelys et al, EV Table 1

| Hypoxia time           | 5min        | 30min        | 1h          | 2h           | 4h           | 8h           | 24h           |
|------------------------|-------------|--------------|-------------|--------------|--------------|--------------|---------------|
| Gene name              | RQ          | RQ           | RQ          | RQ           | RQ           | RQ           | RQ            |
| <i>Akt1</i>            | 1.60 ±0.13  | 1.30 ±0.06   | 1.20 ±0.15  | 1.36 ±0.25   | -1.10 ±0.09  | 1.40 ±0.13   | 1.00 ±0.32    |
| <i>Ang</i>             | 2.65 ±0.25  | 1.23 ±0.36   | -1.04 ±0.12 | 1.24 ±0.04   | 1.24 ±0.12   | 1.09 ±0.08   | 1.26 ±0.28    |
| <i>Angpt1</i>          | 5.51 ±0.17  | 1.20 ±0.30   | 1.19 ±0.07  | 1.90 ±0.49   | 2.43 ±0.36   | 1.56 ±0.43   | -2.27 ±0.06   |
| <i>Angptl4</i>         | 1.03 ±0.02  | -3.14 ±0.09  | 1.65 ±0.54  | 1.60 ±0.46   | 1.56 ±0.67   | 3.50 ±1.07   | -1.37 ±0.35   |
| <i>Anpep</i>           | ND          | -3.26 ±0.29  | 1.65 ±0.01  | -8.05 ±0.06  | -1.04 ±0.14  | 1.62 ±0.62   | 1.03 ±0.43    |
| <i>Apln (Apelin)</i>   | 2.11        | -19.21 ±0.01 | -6.17 ±0.05 | -29.04 ±0.01 | 36.77 ±5.59  | 109.98 ±6.98 | 335.72 ±57.52 |
| <i>Aplnr</i>           | ND          | -2.36 ±0.03  | -1.57 ±0.10 | 1.44 ±0.32   | 3.25 ±1.70   | 1.98 ±0.72   | 2.31 ±1.29    |
| <i>Atp2a2 (SERCA2)</i> | 1.46 ±0.08  | 1.21 ±0.13   | 1.26 ±0.14  | 1.50 ±0.01   | 1.20 ±0.06   | 1.84 ±0.18   | 1.48 ±0.32    |
| <i>Bai1</i>            | -1.52 ±0.19 | 2.90 ±0.91   | 1.17 ±0.06  | 1.65 ±0.52   | 1.36 ±0.13   | 2.05 ±0.60   | 1.04 ±0.30    |
| <i>Ccl2</i>            | ND          | -1.09 ±0.49  | 1.76 ±0.46  | -2.76 ±0.16  | 1.57 ±1.01   | 2.99 ±1.13   | 1.23          |
| <i>Ccl21a</i>          | ND          | -32.39 ±0.01 | 2.97 ±0.85  | -1.90 ±0.03  | 2.65 ±2.78   | -2.27 ±0.21  | 1.32 ±0.39    |
| <i>Col18a1</i>         | 1.66 ±0.71  | 1.58 ±0.39   | 1.14 ±0.14  | 1.45 ±0.04   | -1.69 ±0.09  | 1.82 ±0.43   | 1.57 ±0.43    |
| <i>Col4a3</i>          | 19.64 ±0.07 | 1.52 ±0.19   | 1.20 ±0.21  | 1.31 ±0.04   | 1.00 ±0.03   | 1.45 ±0.30   | 4.40 ±0.80    |
| <i>Ctgf</i>            | 1.29 ±0.09  | 1.67 ±0.26   | 1.16 ±0.06  | 1.30 ±0.13   | 1.06 ±0.13   | 2.05 ±0.30   | 3.66 ±0.76    |
| <i>Cxcl1</i>           | 1.32 ±0.64  | 1.11 ±0.27   | 1.67 ±0.19  | 1.58 ±0.12   | 1.01 ±0.09   | -1.43 ±0.08  | -2.04 ±0.13   |
| <i>Cxcl10</i>          | 1.37 ±0.86  | 1.36 ±0.29   | 1.11 ±0.14  | 1.33 ±0.25   | 1.05 ±0.09   | -1.02 ±0.13  | -1.08 ±0.23   |
| <i>Cyr61</i>           | 2.30 ±0.18  | 3.14 ±0.14   | 1.59 ±0.18  | -1.18 ±0.07  | -1.03 ±0.06  | 1.56 ±0.12   | 1.15 ±0.21    |
| <i>Edn1</i>            | -2.43 ±0.28 | 2.93 ±0.31   | 1.72 ±0.32  | -1.4 ±0.24   | -1.39 ±0.06  | -1.33 ±0.09  | 1.04 ±0.26    |
| <i>Efna1</i>           | 2.08 ±0.15  | 1.23 ±0.10   | -1.52 ±0.12 | -1.16 ±0.19  | 1.25 ±0.09   | 1.17 ±0.05   | 1.35 ±0.33    |
| <i>Efnb2</i>           | 1.74 ±0.14  | 1.55 ±0.25   | 1.14 ±0.23  | -1.03 ±0.18  | 1.57 ±0.18   | 3.71 ±0.61   | 1.65 ±0.42    |
| <i>Egf</i>             | ND          | 1.35 ±0.14   | 1.32 ±0.30  | 1.56 ±0.44   | 1.56 ±0.11   | 2.14 ±0.53   | -1.61 ±0.35   |
| <i>Eng</i>             | 2.96 ±0.94  | 1.55 ±0.39   | 1.18 ±0.19  | -1.02 ±0.14  | -1.11 ±0.15  | 2.27 ±0.33   | 1.65 ±0.34    |
| <i>Ephb4</i>           | 2.22 ±0.13  | 1.67 ±0.16   | -1.03 ±0.14 | 1.10 ±0.13   | 1.01 ±0.12   | 1.45 ±0.09   | 1.57 ±0.21    |
| <i>ErbB2 (Her2)</i>    | 1.87 ±0.19  | 1.85 ±0.26   | -1.01 ±0.18 | 1.16 ±0.18   | 1.32 ±0.11   | 1.00 ±0.18   | 1.34 ±0.09    |
| <i>F3</i>              | 1.12 ±0.94  | 1.45 ±0.18   | 1.28 ±0.11  | -1.57 ±0.23  | -1.23 ±0.07  | -1.09 ±0.10  | -1.56 ±0.21   |
| <i>Fgf1 (aFGF)</i>     | -2.63 ±0.18 | 1.69 ±0.23   | 1.29 ±0.22  | 1.37 ±0.21   | -1.32 ±0.05  | -1.43 ±0.20  | 1.08 ±0.20    |
| <i>Fgf2 (bFGF)</i>     | 1.06 ±0.04  | 1.76 ±0.13   | -2.5 ±0.03  | ND           | -16.05 ±0.02 | -2.05 ±0.07  | 1.43 ±0.35    |
| <i>Fgfr3</i>           | 1.41 ±0.07  | 1.34 ±0.27   | -1.08 ±0.12 | 1.38 ±0.31   | 1.47 ±0.27   | 3.93 ±0.55   | 2.69 ±0.39    |

| <i>Hypoxia time</i>    | 5min        | 30min        | 1h          | 2h          | 4h          | 8h          | 24h         |
|------------------------|-------------|--------------|-------------|-------------|-------------|-------------|-------------|
| <i>Gene name</i>       | RQ          | RQ           | RQ          | RQ          | RQ          | RQ          | RQ          |
| <i>Fn1</i>             | 3.30 ±0.07  | 1.70 ±0.15   | -1.02 ±0.17 | 1.16 ±0.01  | -1.25 ±0.06 | 2.45 ±0.36  | 2.61 ±0.49  |
| <i>Hif1a</i>           | 2.97 ±0.03  | 1.20 ±0.24   | 1.28 ±0.18  | -1.42 ±0.26 | -1.15 ±0.08 | -1.06 ±0.21 | -1.75 ±0.22 |
| <i>Hnrnpm</i>          | 1.55 ±0.18  | 1.17 ±0.18   | 1.54 ±0.15  | 2.26 ±0.20  | 1.86 ±0.25  | 3.86 ±1.33  | 1.23 ±0.26  |
| <i>Hpse</i>            | ND          | 3.23 ±1.07   | 1.25 ±0.34  | 1.64 ±0.16  | 1.56 ±0.14  | 3.52 ±1.07  | 11.04 ±1.95 |
| <i>Id1</i>             | -1.61 ±1.12 | 1.58 ±0.18   | 2.63 ±0.50  | 3.01 ±1.27  | 4.23 ±0.19  | 2.01 ±0.40  | 1.79 ±0.64  |
| <i>Ifna1</i>           | ND          | 1.72 ±0.17   | -1.09 ±0.06 | 1.73 ±0.07  | 2.19 ±0.33  | 3.11 ±0.25  | 1.31 ±0.49  |
| <i>Igf1</i>            | 10.07 ±0.59 | 1.54 ±0.22   | 1.42 ±0.15  | 1.06 ±0.04  | 1.10 ±0.22  | -1.25 ±0.14 | -2.86 ±0.14 |
| <i>Igf1r</i>           | ND          | ND           | ND          | ND          | -3.17 ±0.08 | 2.37 ±0.20  | 5.14 ±0.32  |
| <i>Itgav</i>           | ND          | 1.19 ±0.11   | -1.36 ±0.14 | 1.33 ±0.29  | 1.33 ±0.12  | 3.41 ±0.56  | 2.82 ±0.64  |
| <i>Itgb3</i>           | -4.33 ±0.30 | 1.34 ±0.19   | -1.35 ±0.02 | 1.04 ±0.20  | 1.03 ±0.20  | 1.42 ±0.34  | -1.37 ±0.10 |
| <i>Jag1</i>            | 2.13 ±0.09  | 1.80 ±0.24   | 1.03 ±0.13  | 1.66 ±0.46  | 1.46 ±0.06  | 2.26 ±0.37  | 1.76 ±0.21  |
| <i>Mdk</i>             | 1.14 ±0.21  | 2.45 ±0.17   | -1.07 ±0.17 | -1.27 ±0.00 | 1.16 ±0.32  | 1.52 ±0.38  | -1.16 ±0.46 |
| <i>Mmp14</i>           | -1.77 ±0.03 | 1.30 ±0.22   | 1.02 ±0.06  | -1.16 ±0.17 | 1.06 ±0.11  | 1.70 ±0.24  | 1.95 ±0.15  |
| <i>Mmp2</i>            | 1.46 ±0.18  | 1.96 ±0.50   | 1.20 ±0.05  | 1.68 ±0.44  | 1.14 ±0.33  | 1.94 ±0.66  | -1.23 ±0.37 |
| <i>Neat1</i>           | 4.03 ±0.48  | -1.17 ±0.23  | -1.59 ±0.05 | 2.65 ±0.00  | 1.89 ±0.15  | 2.96 ±1.02  | -1.16 ±0.29 |
| <i>Nos3</i>            | 9.29        | -4.01 ±0.10  | 2.00 ±0.54  | -2.58 ±0.26 | -1.30 ±0.14 | -1.02 ±0.40 | -1.32 ±0.19 |
| <i>Nrp1</i>            | 2.46 ±0.06  | 1.32 ±0.17   | 1.04 ±0.15  | -1.25 ±0.25 | -1.10 ±0.07 | 1.47 ±0.25  | 1.10 ±0.16  |
| <i>Nrp2</i>            | 2.50 ±0.07  | 1.55 ±0.05   | 1.02 ±0.12  | 1.02 ±0.12  | 1.14 ±0.19  | 1.72 ±0.32  | 1.83 ±0.39  |
| <i>P54nrb</i>          | 2.96 ±0.09  | 1.58 ±0.42   | 1.21 ±0.20  | 1.42 ±0.29  | 1.22 ±0.13  | 1.66 ±0.30  | 1.11 ±0.23  |
| <i>PAI1 (SerpinE1)</i> | -1.73 ±0.12 | 2.18 ±0.54   | 1.46 ±0.15  | 1.74 ±0.65  | 5.75 ±0.57  | 15.76 ±2.01 | 13.18 ±1.02 |
| <i>Pdgfa</i>           | 3.65 ±0.43  | 1.45 ±0.18   | 1.29 ±0.26  | 1.59 ±0.36  | 1.71 ±0.11  | 1.97 ±0.35  | 1.54 ±0.34  |
| <i>Pecam1</i>          | 1.48        | -11.55 ±0.02 | -1.09 ±0.24 | 2.86 ±1.08  | 2.09 ±0.77  | 2.70 ±1.72  | 2.60 ±0.86  |
| <i>Pf4</i>             | ND          | -39.36 ±0.02 | -1.79 ±0.33 | -2.20 ±0.18 | 1.80 ±0.40  | 1.48 ±0.55  | 1.01 ±0.28  |
| <i>Pgf</i>             | ND          | 2.17 ±0.14   | -1.36 ±0.19 | -7.89 ±0.09 | 4.47 ±0.89  | 1.85 ±0.29  | 3.22 ±0.85  |
| <i>Plau (upa)</i>      | 1.13 ±0.29  | -1.04 ±0.24  | -1.36 ±0.16 | -1.31 ±0.13 | 1.25 ±0.30  | 1.58 ±0.26  | 1.24 ±0.24  |
| <i>Plg</i>             | ND          | -2.71 ±0.26  | -1.05       | 2.45 ±0.63  | -1.35 ±0.19 | -3.33 ±0.16 | -2.94 ±0.25 |
| <i>Prox1</i>           | 7.13 ±0.20  | 1.48 ±0.23   | 1.26 ±0.14  | -1.13 ±0.14 | -1.08 ±0.13 | 1.27 ±0.29  | -1.72 ±0.07 |

| <b>Hypoxia time</b> | <b>5min</b> | <b>30min</b> | <b>1h</b>   | <b>2h</b>   | <b>4h</b>   | <b>8h</b>    | <b>24h</b>  |
|---------------------|-------------|--------------|-------------|-------------|-------------|--------------|-------------|
| <b>Gene name</b>    | <b>RQ</b>   | <b>RQ</b>    | <b>RQ</b>   | <b>RQ</b>   | <b>RQ</b>   | <b>RQ</b>    | <b>RQ</b>   |
| <i>Psf/Sfpq</i>     | 1.45 ±0.17  | 1.37 ±0.09   | 1.30 ±0.19  | 1.22 ±0.08  | 1.10 ±0.15  | 1.55 ±0.59   | -1.43 ±0.16 |
| <i>Pspc1</i>        | 1.00 ±0.80  | 1.34 ±0.11   | 1.50 ±0.01  | 1.64 ±0.58  | 1.67 ±0.19  | 1.37 ±0.31   | 1.59 ±0.23  |
| <i>SerpinF1</i>     | ND          | -31.89 ±0.02 | -9.09 ±0.01 | -1.91 ±0.33 | -2.38 ±0.11 | -1.14 ±0.17  | 1.02 ±0.37  |
| <i>Sphk1</i>        | ND          | 1.91 ±0.80   | 1.70 ±0.04  | -1.51 ±0.19 | 1.30 ±0.11  | 2.78 ±1.20   | 1.17 ±0.43  |
| <i>Tek</i>          | 1.97 ±1.55  | 1.98 ±0.23   | 1.55 ±0.41  | 1.48 ±0.20  | 1.24 ±0.14  | -1.25 ±0.09  | 1.04 ±0.13  |
| <i>Tgfa</i>         | ND          | -2.01 ±0.13  | -7.94 ±0.05 | -6.9 ±0.03  | 2.91 ±0.63  | 3.50 ±1.29   | 4.05 ±1.71  |
| <i>Tgfb1</i>        | -5.26 ±0.02 | 1.22 ±0.23   | -1.45 ±0.14 | 1.03 ±0.10  | -1.02 ±0.22 | 1.45 ±0.24   | 1.05 ±0.25  |
| <i>Tgfb2</i>        | -2.45 ±0.08 | 1.50 ±0.31   | 1.22 ±0.07  | 1.37 ±0.12  | 1.78 ±0.24  | 2.00 ±0.39   | 1.43 ±0.40  |
| <i>Tgfb1</i>        | -2.03 ±0.57 | 1.33 ±0.16   | 1.28 ±0.25  | 1.48 ±0.14  | 1.86 ±0.34  | 2.23 ±0.77   | -1.27 ±0.16 |
| <i>Thbs1</i>        | 2.65 ±0.09  | 1.88 ±0.12   | 1.19 ±0.09  | 1.47 ±0.33  | 1.12 ±0.07  | 1.30 ±0.22   | 1.44 ±0.08  |
| <i>Thbs2</i>        | 2.15 ±0.12  | 1.52 ±0.10   | 1.03 ±0.16  | 1.20 ±0.18  | -1.20 ±0.01 | 1.21 ±0.15   | -1.22 ±0.21 |
| <i>Timp1</i>        | -2.20 ±0.04 | 1.13 ±0.27   | -1.32 ±0.29 | -1.96 ±0.17 | -1.28 ±0.12 | -1.22 ±0.11  | -2.33 ±0.19 |
| <i>Timp2</i>        | 2.21 ±0.04  | 1.46 ±0.22   | 1.14 ±0.01  | 1.13 ±0.09  | 1.67 ±0.13  | 1.28 ±0.12   | -1.69 ±0.15 |
| <i>Timp3</i>        | ND          | 2.70 ±0.43   | 1.40 ±0.23  | 1.98 ±0.46  | 1.09 ±0.16  | 1.04 ±0.29   | 1.11 ±0.17  |
| <i>Vash1</i>        | ND          | ND           | ND          | ND          | -3.01 ±0.14 | 1.56 ±0.30   | 1.10 ±0.08  |
| <i>Vegfa</i>        | 2.90 ±0.02  | 1.40 ±0.18   | 1.20 ±0.12  | 1.72 ±0.50  | 4.48 ±0.43  | 9.12 ±1.48   | 4.71 ±0.69  |
| <i>Vegfb</i>        | 1.38 ±0.04  | 1.33 ±0.10   | -1.2 ±0.11  | 1.02 ±0.04  | -1.09 ±0.07 | 1.04 ±0.22   | -1.59 ±0.10 |
| <i>Vegfc</i>        | ND          | ND           | 1.38 ±0.18  | ND          | -5.03 ±0.05 | -11.37 ±0.03 | -2.86 ±0.16 |
| <i>Vegfd</i>        | ND          | -1.19 ±0.17  | -1.73 ±0.22 | -1.99 ±0.23 | 1.05 ±0.37  | 1.48 ±0.29   | 1.08 ±0.24  |
| <i>Vegfr2 (Kdr)</i> | -2.05 ±0.05 | 1.25 ±0.13   | 1.07 ±0.04  | 1.43 ±0.21  | 1.31 ±0.10  | 2.29 ±0.38   | -1.01 ±0.30 |

**EV Table 1. Transcriptome of (lymph)angiogenic factor genes in hypoxic HL-1 cardiomyocytes.**

Total RNA was purified from HL-1 cardiomyocytes submitted to increasing times from 5 min to 24 h of hypoxia at 1% O<sub>2</sub>, as well as from normoxic cardiomyocytes as a control. cDNA was synthesized and used for a Fluidigm deltagene PCR array dedicated to genes related to (lymph)angiogenesis or stress (EV Table 6). Relative quantification (RQ) of gene expression in hypoxia was calculated using the 2<sup>-ΔΔCT</sup> method with normalization to 18S and to normoxia. Standard deviation is indicated. When the RQ value is inferior to 1, the fold change is expressed as -1/RQ. ND means “non detected”.



# Hantelys et al. EV Table 2

## Hypoxia: 4 h

| Gene name             | Total mRNA |      | Polysome bound mRNA |      | Fold change                        |                                    | Standard deviation |          |
|-----------------------|------------|------|---------------------|------|------------------------------------|------------------------------------|--------------------|----------|
|                       | RQ 1       | RQ 2 | RQ 1                | RQ 2 | RQ(polysomes)/<br>RQ(total mRNA) 1 | RQ(polysomes)/<br>RQ(total mRNA) 2 | ST DEV 1           | ST DEV 2 |
| <i>Akt1</i>           | 0.54       | 0.63 | 1.12                | 1.45 | 2.07                               | 2.29                               | 0.07               | 0.05     |
| <i>Ang</i>            | 0.22       | 0.59 | 0.54                | 0.44 | 2.42                               | -1.35                              | 0.53               | 0.01     |
| <i>Angpt1</i>         | 0.16       | 0.48 | 0.37                | 0.32 | 2.35                               | -1.48                              | 0.67               | 0.01     |
| <i>Angptl4</i>        | 0.21       | 0.39 | 0.67                | 0.48 | 3.26                               | 1.23                               | 1.56               | 0.15     |
| <i>Anpep</i>          | 0.41       | 0.40 | 1.39                | 1.59 | 3.41                               | 3.96                               | 0.21               | 0.83     |
| <i>Apelin</i>         | 35.38      | 2.85 | 60.39               | 4.47 | 1.71                               | 1.57                               | 0.27               | 0.10     |
| <i>Aplnnr</i>         | 3.25       | ND   | 1.12                | ND   | -2.86                              | ND                                 | 0.35               | ND       |
| <i>Atp2a2</i>         | 0.31       | 0.45 | 0.6                 | 0.84 | 1.94                               | 1.84                               | 0.34               | 0.07     |
| <i>Bai1</i>           | 0.16       | 0.39 | 0.61                | 1.97 | 3.8                                | 5.06                               | 0.89               | 0.30     |
| <i>Ccl2</i>           | 1.57       | 1.96 | ND                  | ND   | ND                                 | ND                                 | ND                 | ND       |
| <i>Ccl21a</i>         | 2.65       | ND   | ND                  | ND   | ND                                 | ND                                 | ND                 | ND       |
| <i>Col18a1</i>        | 0.45       | 0.57 | 1.18                | 0.88 | 2.64                               | 1.53                               | 0.61               | 0.19     |
| <i>Col4a3</i>         | 0.37       | 0.51 | 0.87                | 1.15 | 2.36                               | 2.24                               | 0.41               | 0.13     |
| <i>Ctgf</i>           | 0.29       | 0.48 | 0.9                 | 0.13 | 3.15                               | -3.77                              | 0.49               | 0.00     |
| <i>Cxcl1</i>          | 0.1        | 0.56 | 0.22                | 0.29 | 2.21                               | -1.95                              | 0.3                | 0.04     |
| <i>Cxcl10 (inp10)</i> | 0.19       | 0.43 | 0.74                | 0.13 | 3.96                               | -3.26                              | 1.43               | 0.02     |
| <i>Cyr 61</i>         | 0.45       | 0.72 | 0.91                | 0.62 | 2                                  | -1.16                              | 0.24               | 0.04     |
| <i>Edn1</i>           | 0.27       | 0.48 | 0.68                | 0.68 | 2.49                               | 1.42                               | 0.55               | 0.03     |
| <i>Efna1</i>          | 0.3        | 0.48 | 0.69                | 0.82 | 2.29                               | 1.69                               | 0.29               | 0.16     |
| <i>Efnb2</i>          | 0.53       | 0.55 | 1.31                | 0.68 | 2.48                               | 1.23                               | 0.71               | 0.01     |
| <i>Egf</i>            | 0.21       | 0.56 | 0.53                | 2.34 | 2.46                               | 4.16                               | 1.56               | 0.67     |
| <i>Eng</i>            | 0.8        | 0.63 | 2.16                | 1.36 | 2.71                               | 2.16                               | 0.78               | 0.25     |
| <i>Ephb4</i>          | 0.31       | 0.50 | 0.58                | 0.68 | 1.87                               | 1.36                               | 0.23               | 0.05     |
| <i>ErbB2(her2)</i>    | 0.27       | 0.41 | 0.55                | 0.60 | 2.02                               | 1.44                               | 0.24               | 0.08     |
| <i>F3</i>             | 0.44       | 0.78 | 1.1                 | 0.51 | 2.48                               | -1.53                              | 0.51               | 0.00     |
| <i>Fgf1</i>           | 0.3        | 0.40 | 0.76                | 1.16 | 2.56                               | 2.90                               | 0.87               | 0.19     |
| <i>Fgf2</i>           | 0.06       | -    | ND                  | -    | ND                                 | -                                  | ND                 | -        |
| <i>Fgfr3</i>          | 0.63       | 0.70 | 1.35                | 0.88 | 2.15                               | 1.25                               | 0.41               | 0.12     |
| <i>Fibrillarin</i>    | ND         | 0.61 | ND                  | 1.06 | ND                                 | 1.73                               | ND                 | 0.04     |
| <i>Fn1</i>            | 0.48       | 0.46 | 1.13                | 0.57 | 2.34                               | 1.23                               | 0.3                | 0.04     |
| <i>Hif1a</i>          | 0.52       | 0.55 | 0.97                | 0.90 | 1.88                               | 1.63                               | 0.36               | 0.18     |
| <i>Hif2a</i>          | ND         | 0.39 | ND                  | 0.64 | ND                                 | 1.64                               | ND                 | 0.14     |
| <i>Hnrnpm</i>         | 0.74       | 0.68 | 1.84                | 1.42 | 2.48                               | 2.08                               | 0.5                | 0.01     |
| <i>Hpse</i>           | 0.66       | 0.61 | 2.75                | 1.26 | 4.17                               | 2.07                               | 0.79               | 0.16     |
| <i>Id1</i>            | 0.47       | ND   | 0.9                 | 0.87 | 1.93                               | ND                                 | 0.38               | ND       |

|                     |      |      |      |      |       |       |      |      |
|---------------------|------|------|------|------|-------|-------|------|------|
| <i>Ifna1</i>        | 0.34 | ND   | 1.35 | 1.91 | 3.93  | ND    | 1.38 | ND   |
| <i>Igf1</i>         | 0.22 | 0.40 | 0.44 | 0.79 | 2.03  | 1.97  | 0.54 | 0.13 |
| <i>Igf1r</i>        | 1.05 | 0.79 | 1.97 | 1.49 | 1.88  | 1.88  | 0.06 | 0.06 |
| <i>Itgav</i>        | 0.48 | 0.61 | 0.86 | 0.75 | 1.79  | 1.22  | 0.31 | 0.01 |
| <i>Itgb3</i>        | 0.48 | 0.56 | 1.18 | 0.52 | 2.44  | -1.07 | 0.4  | 0.09 |
| <i>Jag1</i>         | 0.17 | ND   | 0.35 | ND   | 2.03  | ND    | 0.38 | ND   |
| <i>Mdk</i>          | 0.47 | ND   | 0.96 | 0.66 | 2.03  | ND    | 0.35 | ND   |
| <i>Mmp14</i>        | 0.44 | 0.79 | 0.82 | 0.90 | 1.85  | 1.13  | 0.18 | 0.13 |
| <i>Mmp2</i>         | 0.27 | 0.24 | 0.52 | 1.26 | 1.91  | 5.14  | 0.44 | 2.48 |
| <i>Neat-1</i>       | 0.22 | 0.43 | 0.88 | 4.21 | 3.98  | 9.90  | 1.24 | 0.03 |
| <i>Nos3</i>         | 1.08 | 0.20 | 0.84 | 2.35 | -1.30 | 11.86 | 0.1  | 4.49 |
| <i>Nrp1</i>         | 0.54 | 0.48 | 0.9  | 0.35 | 1.67  | -1.37 | 0.22 | 0.00 |
| <i>Nrp2</i>         | 0.51 | 0.60 | 0.96 | 0.78 | 1.88  | 1.29  | 0.18 | 0.09 |
| <i>P54nrb</i>       | 0.57 | 0.73 | 1.77 | 1.32 | 3.12  | 1.81  | 0.78 | 0.09 |
| <i>Pai-1</i>        | 4.77 | 2.31 | 9.15 | 5.12 | 1.92  | 2.22  | 0.27 | 0.27 |
| <i>Pdgfa</i>        | 0.41 | 0.59 | 0.99 | 1.33 | 2.42  | 2.24  | 0.48 | 0.06 |
| <i>Pecam1</i>       | 0.55 | 0.93 | 1.18 | 0.95 | 2.15  | 1.03  | 1.37 | 0.15 |
| <i>Pf4</i>          | 0.44 | 0.54 | 0.86 | 0.47 | 1.97  | -1.15 | 1.07 | 0.03 |
| <i>Pgf</i>          | 0.65 | 0.20 | 1.53 | 3.70 | 2.36  | 18.38 | 0.83 | 2.53 |
| <i>PLAU(upa)</i>    | 0.31 | 0.36 | 0.68 | 0.73 | 2.16  | 2.03  | 0.5  | 0.59 |
| <i>Plg</i>          | 0.67 | ND   | 0.17 | ND   | -3.85 | ND    | 0.77 | ND   |
| <i>Prox1</i>        | 0.33 | 0.51 | 0.72 | 1.52 | 2.22  | 2.95  | 0.27 | 0.51 |
| <i>Psf/sfpq</i>     | 0.44 | 0.65 | 1.21 | 0.75 | 2.74  | 1.15  | 0.8  | 0.02 |
| <i>Pspc1</i>        | 0.36 | 0.47 | 0.8  | 0.79 | 2.19  | 1.68  | 0.43 | 0.03 |
| <i>Serpinf1</i>     | 0.31 | 0.12 | 1.79 | 0.89 | 5.7   | 7.61  | 2.05 | 0.95 |
| <i>Sphk1</i>        | 0.58 | 0.63 | 0.45 | 2.32 | -1.30 | 3.65  | 0.12 | 1.09 |
| <i>Tek</i>          | 0.22 | 0.44 | 0.54 | 1.15 | 2.43  | 2.62  | 0.95 | 0.24 |
| <i>Tgfa</i>         | 0.85 | 0.43 | 2.09 | 1.03 | 2.45  | 2.40  | 0.31 | 1.00 |
| <i>Tgfb1</i>        | 0.29 | 0.52 | 0.74 | 0.57 | 2.52  | 1.08  | 0.31 | 0.03 |
| <i>Tgfb2</i>        | 0.3  | 0.63 | 0.72 | 0.52 | 2.39  | -1.22 | 0.39 | 0.04 |
| <i>Tgfbr1</i>       | 0.44 | 0.52 | 0.81 | 0.51 | 1.86  | -1.02 | 0.57 | 0.02 |
| <i>Thbs1</i>        | 0.31 | 0.48 | 0.62 | 0.38 | 2.03  | -1.27 | 0.3  | 0.23 |
| <i>Thbs2</i>        | 0.35 | 0.47 | 0.7  | 0.67 | 1.98  | 1.43  | 0.28 | 0.01 |
| <i>Timp1</i>        | 0.27 | 0.46 | 0.63 | 0.43 | 2.36  | -1.07 | 0.34 | 0.15 |
| <i>Timp2</i>        | 0.27 | 0.52 | 0.69 | 0.90 | 2.55  | 1.73  | 0.42 | 0.04 |
| <i>Timp3</i>        | 0.22 | 0.57 | 0.44 | 0.77 | 1.95  | 1.35  | 0.31 | 0.02 |
| <i>Vash1</i>        | -    | 0.33 | -    | 2.28 | -     | 6.86  | -    | 4.27 |
| <i>Vegfa</i>        | 1.82 | 2.09 | 5.38 | 2.28 | 2.95  | 1.09  | 0.7  | 0.04 |
| <i>Vegfb</i>        | 2.94 | 0.59 | 8.39 | 1.40 | 2.85  | 2.37  | 0.43 | 0.07 |
| <i>Vegfc</i>        | 1.05 | -    | ND   | -    | ND    | -     | ND   | -    |
| <i>Vegfd</i>        | 0.23 | 0.48 | 0.56 | 0.85 | 2.44  | 1.78  | 0.96 | 0.23 |
| <i>Vegfr2 (kdr)</i> | 0.25 | 0.37 | 0.58 | 0.57 | 2.29  | 1.55  | 0.55 | 0.15 |

## Hypoxia: 24 h

| Gene name             | Total mRNA | Polysome bound mRNA | Fold change | Standard deviation |
|-----------------------|------------|---------------------|-------------|--------------------|
| <i>Akt1</i>           | 1.80       | 5.69                | 3.17        | 0.22               |
| <i>Ang</i>            | 1.88       | 2.38                | 1.26        | 0.15               |
| <i>Angpt1</i>         | 1.17       | 2.62                | 2.24        | 0.08               |
| <i>Angptl4</i>        | ND         | ND                  | ND          | ND                 |
| <i>Anpep</i>          | 4.68       | ND                  | ND          | ND                 |
| <i>Apelin</i>         | 31.49      | ND                  | ND          | ND                 |
| <i>Aplnr</i>          | ND         | ND                  | ND          | ND                 |
| <i>Atp2a2</i>         | 3.34       | 2.73                | -1.22       | 0.12               |
| <i>Bai1</i>           | 1.39       | ND                  | ND          | ND                 |
| <i>Ccl2</i>           | ND         | ND                  | ND          | ND                 |
| <i>Ccl21a</i>         | ND         | 0.83                | ND          | ND                 |
| <i>Col18a1</i>        | 4.29       | 12.60               | 2.94        | 0.27               |
| <i>Col4a3</i>         | 5.14       | 9.53                | 1.85        | 0.21               |
| <i>Ctgf</i>           | 1.83       | 2.75                | 1.50        | 0.07               |
| <i>Cxcl1</i>          | 1.09       | 1.04                | -1.06       | 0.23               |
| <i>Cxcl10 (inp10)</i> | 10.42      | ND                  | ND          | ND                 |
| <i>Cyr 61</i>         | 4.57       | 5.52                | 1.21        | 0.12               |
| <i>Edn1</i>           | 2.40       | 2.13                | -1.12       | 0.04               |
| <i>Efna1</i>          | 4.02       | 2.79                | -1.44       | 0.04               |
| <i>Efnb2</i>          | 2.86       | 3.03                | 1.06        | 0.07               |
| <i>Egf</i>            | 2.33       | ND                  | ND          | ND                 |
| <i>Eng</i>            | 4.50       | ND                  | D           | ND                 |
| <i>Ephb4</i>          | 2.67       | 3.37                | 1.26        | 0.01               |
| <i>Erb2(her2)</i>     | 2.26       | 4.96                | 2.20        | 0.34               |
| <i>F3</i>             | 3.72       | 5.21                | 1.40        | 0.06               |
| <i>Fgf1</i>           | 1.00       | ND                  | ND          | ND                 |
| <i>Fgf2</i>           | -          | -                   | -           | -                  |
| <i>Fgfr3</i>          | 5.01       | 9.20                | 1.84        | 0.35               |
| <i>Fibrinogen</i>     | 2.13       | 2.49                | 1.17        | 0.22               |
| <i>Fn1</i>            | ND         | ND                  | ND          | ND                 |
| <i>Hif1a</i>          | 1.24       | 2.75                | 2.21        | 0.21               |
| <i>Hif2a</i>          | 1.56       | ND                  | ND          | ND                 |
| <i>Hnnp1b1</i>        | 1.25       | 7.91                | 6.34        | 0.76               |
| <i>Hpse</i>           | 17.68      | 7.70                | -2.30       | 0.07               |
| <i>Id1</i>            | 1.75       | ND                  | ND          | ND                 |
| <i>Ifna1</i>          | ND         | ND                  | ND          | ND                 |
| <i>Igf1</i>           | 1.73       | 1.42                | -1.22       | 0.07               |
| <i>Igf1r</i>          | 4.65       | 4.94                | 1.06        | 0.00               |
| <i>Itgav</i>          | 5.01       | 7.29                | 1.46        | 0.17               |
| <i>Itgb3</i>          | 1.99       | 15.07               | 7.56        | 0.49               |

|                     |       |       |       |      |
|---------------------|-------|-------|-------|------|
| <i>Jag1</i>         | ND    | ND    | ND    | ND   |
| <i>Mdk</i>          | 2.08  | ND    | ND    | ND   |
| <i>Mmp14</i>        | 3.04  | 4.42  | 1.45  | 0.17 |
| <i>Mmp2</i>         | 2.88  | ND    | ND    | ND   |
| <i>Neat-1</i>       | 3.20  | 3.44  | 1.08  | 0.17 |
| <i>Nos3</i>         | ND    | ND    | ND    | ND   |
| <i>Nrp1</i>         | 3.04  | 2.84  | -1.07 | 0.12 |
| <i>Nrp2</i>         | 4.42  | 5.27  | 1.19  | 0.07 |
| <i>P54nrb</i>       | 2.55  | 7.61  | 2.99  | 0.08 |
| <i>Pai-1</i>        | 18.19 | ND    | ND    | ND   |
| <i>Pdgfa</i>        | 2.90  | 10.05 | 3.46  | 0.34 |
| <i>Pecam1</i>       | 11.37 | ND    | ND    | ND   |
| <i>Pf4</i>          | 1.16  | ND    | ND    | ND   |
| <i>Pgf</i>          | 6.82  | ND    | ND    | ND   |
| <i>PLAU(upa)</i>    | 4.42  | 2.28  | -1.94 | 0.00 |
| <i>Plg</i>          | ND    | ND    | ND    | ND   |
| <i>Prox1</i>        | 1.10  | 3.35  | 3.04  | 0.28 |
| <i>Psf/sfpq</i>     | 0.86  | 4.59  | 5.32  | 0.05 |
| <i>Pspc1</i>        | 1.23  | 1.73  | ND    | ND   |
| <i>Serpinf1</i>     | 15.49 | ND    | ND    | ND   |
| <i>Sphk1</i>        | 6.11  | ND    | ND    | ND   |
| <i>Tek</i>          | 4.07  | 5.49  | 1.35  | 0.16 |
| <i>Tgfa</i>         | 4.75  | ND    | ND    | ND   |
| <i>Tgfb1</i>        | 3.41  | 5.67  | 1.66  | 0.14 |
| <i>Tgfb2</i>        | 4.72  | 1.80  | -2.63 | 0.06 |
| <i>Tgfb1</i>        | 2.08  | 2.37  | 1.14  | 0.23 |
| <i>Thbs1</i>        | 5.35  | 4.11  | -1.30 | 0.10 |
| <i>Thbs2</i>        | 3.77  | 3.29  | -1.15 | 0.01 |
| <i>Timp1</i>        | 2.75  | 2.05  | -1.34 | 0.12 |
| <i>Timp2</i>        | 2.12  | 1.94  | -1.09 | 0.14 |
| <i>Timp3</i>        | 5.20  | ND    | ND    | ND   |
| <i>Vash1</i>        | 7.43  | ND    | ND    | ND   |
| <i>Vegfa</i>        | 8.15  | 14.73 | 1.81  | 0.19 |
| <i>Vegfb</i>        | 1.94  | 6.41  | 3.31  | 0.34 |
| <i>Vegfc</i>        | -     | -     | -     | -    |
| <i>Vegfd</i>        | 2.77  | ND    | ND    | ND   |
| <i>Vegfr2 (kdr)</i> | 3.04  | 2.28  | -1.33 | 0.13 |

**EV Table 2. Translatome of (lymph)angiogenic factor genes in hypoxic HL-1 cardiomyocytes.** Polysomes were purified on sucrose gradient from HL-1 cardiomyocytes either in normoxia or after 4 h or after 24 h of hypoxia at 1% O<sub>2</sub>, as described in Materials and Methods. RNA was purified from polysome-bound and from cell lysate (before gradient loading). cDNA and PCR array was performed as in Figure 1 and in EV Table 1. Relative quantification (RQ) of gene expression in hypoxia was calculated using the  $2^{-\Delta\Delta CT}$  method

(polysomal RNA/total RNA normalized to normoxia). The 4 h time of hypoxia array was repeated in two independent arrays (RQ1 and RQ2). The values presented in Figures 2 and 3 correspond to RQ1 values. For each array, gene expression analysis was performed in three replicates. Standard deviation is indicated. When the RQ value is inferior to 1, the fold change is expressed as  $-1/RQ$ . ND means "non detected". "-" means that the gene was not included in the array.

# A/ Kinetics of FGF1 IRES activity in hypoxia (30 min to 24 h)

## Normoxia

| LucF       | A       | B       | C       | Mean    | SD     | LucR       | A       | B       | C       | Mean    | SD      |
|------------|---------|---------|---------|---------|--------|------------|---------|---------|---------|---------|---------|
| 30min/ 16h | 1379893 | 1430614 | 1379161 | 1396556 | 29498  | 30min/ 16h | 7946845 | 8739701 | 8113491 | 8266679 | 418038  |
| 1h         | 1125637 | 1523078 | 1518366 | 1389027 | 228115 | 1h         | 7848356 | 8700328 | 8205407 | 8251364 | 427841  |
| 2h         | 1261000 | 1469939 | 1356217 | 1362385 | 104606 | 2h         | 7763820 | 8766358 | 8196176 | 8242118 | 502846  |
| 4h         | 1154339 | 1436444 | 1532732 | 1374505 | 196654 | 4h         | 6957128 | 8160444 | 8944535 | 8020702 | 1001046 |
| 6h         | 1357302 | 1583219 | 1525817 | 1488779 | 117424 | 6h         | 8571896 | 9444154 | 9233090 | 9083047 | 455075  |
| 8h/ 24h    | 1772344 | 1668645 | 1416015 | 1619001 | 183278 | 8h/ 24h    | 8896288 | 8402478 | 7130206 | 8142991 | 911187  |

## Hypoxia

| LucF  | A       | B       | C       | Mean    | SD     | LucR  | A        | B        | C        | Mean     | SD      |
|-------|---------|---------|---------|---------|--------|-------|----------|----------|----------|----------|---------|
| 30min | 1758060 | 1725309 | 1674165 | 1719178 | 42282  | 30min | 11000223 | 10866380 | 10294397 | 10720333 | 374893  |
| 1h    | 1475799 | 1562285 | 1591315 | 1543133 | 60092  | 1h    | 10257343 | 10319905 | 10828619 | 10468622 | 313332  |
| 2h    | 1728494 | 1889719 | 1927154 | 1848456 | 105562 | 2h    | 11652705 | 11702822 | 12633961 | 11996496 | 552629  |
| 4h    | 1891657 | 1744526 | 2255783 | 1963989 | 263192 | 4h    | 10450445 | 10725351 | 12210832 | 11128876 | 947030  |
| 6h    | 1815024 | 2151709 | 2541526 | 2169420 | 363575 | 6h    | 10117963 | 10586170 | 10958961 | 10554365 | 421400  |
| 8h    | 2143188 | 2354330 | 2311918 | 2269812 | 111691 | 8h    | 10592865 | 10001462 | 10350135 | 10314821 | 297279  |
| 16h   | 1860159 | 1762647 | 1940120 | 1854309 | 88881  | 16h   | 12250023 | 11839180 | 12615589 | 12234930 | 388424  |
| 24h   | 1733141 | 1936317 | 2026315 | 1898591 | 150184 | 24h   | 14326454 | 13708075 | 16512683 | 14849071 | 1473534 |

## LucF/ LucR

|       |               | Biological replicates |        |        |        |        | IRES activity: LucF/LucR<br>*100 |      |             |              |      |
|-------|---------------|-----------------------|--------|--------|--------|--------|----------------------------------|------|-------------|--------------|------|
| Time  | Condition     | A                     | B      | C      | Mean   | SD     | Mean                             | SD   | t-test      | Significance | H/N  |
| 30min | Normoxia      | 0.1736                | 0.1637 | 0.1700 | 0.1691 | 0.0050 | 16.91                            | 0.50 |             |              |      |
|       | Hypoxia       | 0.1598                | 0.1588 | 0.1626 | 0.1604 | 0.0020 | 16.04                            | 0.20 | 0.040990334 | *            | 0.95 |
| 1h    | Normoxia      | 0.1434                | 0.1751 | 0.1850 | 0.1678 | 0.0217 | 16.78                            | 2.17 |             |              |      |
|       | Hypoxia       | 0.1439                | 0.1514 | 0.1470 | 0.1474 | 0.0038 | 14.74                            | 0.38 | 0.10537981  |              | 0.88 |
| 2h    | Normoxia      | 0.1624                | 0.1677 | 0.1655 | 0.1652 | 0.0026 | 16.52                            | 0.26 |             |              |      |
|       | Hypoxia       | 0.1483                | 0.1615 | 0.1525 | 0.1541 | 0.0067 | 15.41                            | 0.67 | 0.022944683 | *            | 0.93 |
| 4h    | Normoxia      | 0.1659                | 0.1760 | 0.1714 | 0.1711 | 0.0051 | 17.11                            | 0.51 |             |              |      |
|       | Hypoxia       | 0.1810                | 0.1627 | 0.1847 | 0.1761 | 0.0118 | 17.61                            | 1.18 | 0.319890477 |              | 1.03 |
| 6h    | Normoxia      | 0.1583                | 0.1676 | 0.1653 | 0.1637 | 0.0048 | 16.37                            | 0.48 |             |              |      |
|       | Hypoxia       | 0.1794                | 0.2033 | 0.2319 | 0.2049 | 0.0263 | 20.49                            | 2.63 | 0.046232591 | *            | 1.25 |
| 8h    | Normoxia      | 0.1992                | 0.1986 | 0.1986 | 0.1988 | 0.0004 | 19.88                            | 0.04 |             |              |      |
|       | Hypoxia       | 0.2023                | 0.2354 | 0.2234 | 0.2204 | 0.0167 | 22.04                            | 1.67 | 0.080176714 |              | 1.11 |
| 16h   | Normoxia      | 0.1736                | 0.1637 | 0.1700 | 0.1691 | 0.0050 | 16.91                            | 0.50 |             |              |      |
|       | Hypoxia       | 0.1518                | 0.1489 | 0.1538 | 0.1515 | 0.0025 | 15.15                            | 0.25 | 0.007194029 | **           | 0.90 |
| 24h   | Normoxia      | 0.1992                | 0.1986 | 0.1986 | 0.1988 | 0.0004 | 19.88                            | 0.04 |             |              |      |
|       | Hypoxia       | 0.1210                | 0.1413 | 0.1227 | 0.1283 | 0.0112 | 12.83                            | 1.12 | 0.004341785 | ***          | 0.65 |
|       | Normoxia mean | 0.1672                | 0.1748 | 0.1760 | 0.1726 | 0.0131 | 17.26                            | 1.31 |             |              |      |

\*= p<0.05  
\*\*=p<0.01  
\*\*\*=p<0.005

B/ FGF1 IRES

LucF

LucR

| Experiment | Time | Condition | A       | B       | C       | Mean    | SD    | Experiment | Time | Condition | A         | B         | C         | Mean      | SD     |
|------------|------|-----------|---------|---------|---------|---------|-------|------------|------|-----------|-----------|-----------|-----------|-----------|--------|
| 1          | 4h   | Normoxia  | 77 310  | 91 175  | 63 445  | 77 310  | 13865 | 1          | 4h   | Normoxia  | 604 174   | 507 891   | 700 457   | 604 174   | 96283  |
|            |      | Hypoxia   | 248 088 | 192 876 | 303 300 | 248 088 | 55212 |            |      | Hypoxia   | 996 143   | 899 215   | 1 093 070 | 996 143   | 96928  |
|            | 8h   | Normoxia  | 3 721   | 5 041   | 2 401   | 3 721   | 1320  |            | 8h   | Normoxia  | 12 580    | 13 628    | 11 532    | 12 580    | 1048   |
|            |      | Hypoxia   | 10 760  | 12 896  | 8 624   | 10 760  | 2136  |            |      | Hypoxia   | 35 746    | 46 304    | 25 188    | 35 746    | 10558  |
|            | 24h  | Normoxia  | 231 071 | 198 199 | 263 943 | 231 071 | 32872 |            | 24h  | Normoxia  | 1 010 280 | 1 134 589 | 885 971   | 1 010 280 | 124309 |
|            |      | Hypoxia   | 138 279 | 153 534 | 123 025 | 138 279 | 15255 |            |      | Hypoxia   | 662 414   | 716 741   | 608 087   | 662 414   | 54327  |
| 2          | 4h   | Normoxia  | 52 728  | 58 279  | 56 285  | 55 764  | 2812  | 2          | 4h   | Normoxia  | 452 118   | 345 763   | 472 356   | 423 412   | 68003  |
|            |      | Hypoxia   | 138 626 | 171 997 | 152 394 | 154 339 | 16770 |            |      | Hypoxia   | 714 978   | 915 991   | 757 182   | 796 050   | 105993 |
|            | 8h   | Normoxia  | 72 622  | 72 505  | 73 578  | 72 902  | 589   |            | 8h   | Normoxia  | 700 579   | 710 733   | 712 400   | 707 904   | 6398   |
|            |      | Hypoxia   | 70 529  | 72 640  | 33 059  | 58 743  | 22268 |            |      | Hypoxia   | 631 364   | 634 140   | 633 140   | 632 881   | 1406   |
|            | 24h  | Normoxia  | 208 454 | 220 996 | 210 670 | 213 373 | 6694  |            | 24h  | Normoxia  | 1 021 135 | 1 036 550 | 1 020 270 | 1025985   | 9160   |
|            |      | Hypoxia   | 100 770 | 113 450 | 99 785  | 104 668 | 7621  |            |      | Hypoxia   | 519 324   | 514 720   | 769 988   | 601 344   | 146068 |
| 3          | 4h   | Normoxia  | 59 485  | 53 665  | 53 223  | 55 458  | 3495  | 3          | 4h   | Normoxia  | 495 500   | 529 252   | 547 526   | 524 093   | 26394  |
|            |      | Hypoxia   | 110 552 | 157 006 | 149 316 | 138 958 | 24899 |            |      | Hypoxia   | 754 720   | 974 680   | 917 680   | 882 360   | 114154 |
|            | 8h   | Normoxia  | 121 992 | 112 068 | 132 044 | 122 035 | 9988  |            | 8h   | Normoxia  | 912 286   | 860 603   | 855 579   | 876 156   | 31390  |
|            |      | Hypoxia   | 118 486 | 109 078 | 112 198 | 113 254 | 4792  |            |      | Hypoxia   | 826 664   | 827 015   | 822 262   | 825 314   | 2649   |
|            | 24h  | Normoxia  | 226 971 | 199 587 | 262 787 | 229 782 | 31694 |            | 24h  | Normoxia  | 956 252   | 896 252   | 789 825   | 880 776   | 84286  |
|            |      | Hypoxia   | 105 268 | 70 597  | 90 603  | 88 823  | 17404 |            |      | Hypoxia   | 455 239   | 386 245   | 351 256   | 397 580   | 52910  |

LucF/ LucR

|            |      |           | Biological replicates |        |        |        |        |       | AU : LucF/LucR *100 |        |              |      |
|------------|------|-----------|-----------------------|--------|--------|--------|--------|-------|---------------------|--------|--------------|------|
| Experiment | Time | Condition | A                     | B      | C      | Mean   | SD     | Mean  | SD                  | t-test | Significance | H/N  |
| 1          | 4h   | Normoxia  | 0.1280                | 0.1795 | 0.0906 | 0.1327 | 0.0447 | 13.27 | 4.47                | 0.061  |              | 1.86 |
|            |      | Hypoxia   | 0.2490                | 0.2145 | 0.2775 | 0.2470 | 0.0315 | 24.70 | 3.15                |        |              |      |
|            | 8h   | Normoxia  | 0.2958                | 0.3699 | 0.2082 | 0.2913 | 0.0809 | 29.13 | 8.09                | 0.415  |              | 1.05 |
|            |      | Hypoxia   | 0.3010                | 0.2785 | 0.3424 | 0.3073 | 0.0324 | 30.73 | 3.24                |        |              |      |
|            | 24h  | Normoxia  | 0.2287                | 0.1747 | 0.2979 | 0.2338 | 0.0618 | 23.38 | 6.18                | 0.292  |              | 0.89 |
|            |      | Hypoxia   | 0.2088                | 0.2142 | 0.2023 | 0.2084 | 0.0060 | 20.84 | 0.60                |        |              |      |
| 2          | 4h   | Normoxia  | 0.1166                | 0.1686 | 0.1192 | 0.1348 | 0.0293 | 13.48 | 2.93                | 0.049  | *            | 1.44 |
|            |      | Hypoxia   | 0.1939                | 0.1878 | 0.2013 | 0.1943 | 0.0068 | 19.43 | 0.68                |        |              |      |
|            | 8h   | Normoxia  | 0.1037                | 0.1020 | 0.1033 | 0.1030 | 0.0009 | 10.30 | 0.09                | 0.335  |              | 0.90 |
|            |      | Hypoxia   | 0.1117                | 0.1145 | 0.0522 | 0.0928 | 0.0352 | 9.28  | 3.52                |        |              |      |
|            | 24h  | Normoxia  | 0.2041                | 0.2132 | 0.2065 | 0.2079 | 0.0047 | 20.79 | 0.47                | 0.204  |              | 0.87 |
|            |      | Hypoxia   | 0.1940                | 0.2204 | 0.1296 | 0.1813 | 0.0467 | 18.13 | 4.67                |        |              |      |
| 3          | 4h   | Normoxia  | 0.1201                | 0.1014 | 0.0972 | 0.1062 | 0.0122 | 10.62 | 1.22                | 0.027  | *            | 1.48 |
|            |      | Hypoxia   | 0.1465                | 0.1611 | 0.1627 | 0.1568 | 0.0089 | 15.68 | 0.89                |        |              |      |
|            | 8h   | Normoxia  | 0.1337                | 0.1302 | 0.1543 | 0.1394 | 0.0130 | 13.94 | 1.30                | 0.406  |              | 0.98 |
|            |      | Hypoxia   | 0.1433                | 0.1319 | 0.1365 | 0.1372 | 0.0058 | 13.72 | 0.58                |        |              |      |
|            | 24h  | Normoxia  | 0.2374                | 0.2227 | 0.3327 | 0.2643 | 0.0597 | 26.43 | 5.97                | 0.090  |              | 0.85 |
|            |      | Hypoxia   | 0.2312                | 0.1828 | 0.2579 | 0.2240 | 0.0381 | 22.40 | 3.81                |        |              |      |

| Final values |           | AU : LucF/LucR *100 |       |       |        |              |  |
|--------------|-----------|---------------------|-------|-------|--------|--------------|--|
| Time         | Condition | Total mean          | SD    | ratio | t-test | Significance |  |
| 4h           | Normoxia  | 12.46               | 3.07  | 1.60  | 0.003  | ***          |  |
|              | Hypoxia   | 19.94               | 4.27  |       |        |              |  |
| 8h           | Normoxia  | 17.79               | 9.57  | 1.01  | 0.954  |              |  |
|              | Hypoxia   | 17.91               | 10.10 |       |        |              |  |
| 24h          | Normoxia  | 23.53               | 4.95  | 0.87  | 0.072  |              |  |
|              | Hypoxia   | 20.46               | 3.56  |       |        |              |  |



## C/ FGF2 IRES

### LucF

| Experiment | Time | Condition | A       | B       | C       | Mean    | SD    |
|------------|------|-----------|---------|---------|---------|---------|-------|
| 1          | 4h   | Normoxia  | 89 743  | 98 302  | 91 878  | 93 308  | 4455  |
|            |      | Hypoxia   | 109 876 | 111 252 | 98 034  | 106 387 | 7267  |
|            | 8h   | Normoxia  | 146 589 | 149 931 | 129 865 | 142 128 | 10751 |
|            |      | Hypoxia   | 124 357 | 130 350 | 152 345 | 135 684 | 14737 |
|            | 24h  | Normoxia  | 116 853 | 120 498 | 124 567 | 120 639 | 3859  |
|            |      | Hypoxia   | 182 431 | 173 530 | 165 431 | 173 797 | 8503  |
| 2          | 4h   | Normoxia  | 104 059 | 102 906 | 102 632 | 103 199 | 757   |
|            |      | Hypoxia   | 109 548 | 111 252 | 120 034 | 113 611 | 5627  |
|            | 8h   | Normoxia  | 84 185  | 90 263  | 75623   | 83 357  | 7355  |
|            |      | Hypoxia   | 85 227  | 82 565  | 78 265  | 82 019  | 3513  |
|            | 24h  | Normoxia  | 226 539 | 198 256 | 161 526 | 195 440 | 32598 |
|            |      | Hypoxia   | 245 261 | 256 154 | 198 782 | 233 399 | 30470 |
| 3          | 4h   | Normoxia  | 80 652  | 78 568  | 70 687  | 76 636  | 5256  |
|            |      | Hypoxia   | 85 698  | 90 565  | 84 568  | 86 944  | 3187  |
|            | 8h   | Normoxia  | 80 256  | 77 895  | 79 568  | 79 240  | 1214  |
|            |      | Hypoxia   | 80 268  | 82 568  | 79 635  | 80 824  | 1543  |
|            | 24h  | Normoxia  | 178 258 | 170 625 | 168 262 | 172 382 | 5224  |
|            |      | Hypoxia   | 258 684 | 298 365 | 224 265 | 260 438 | 37081 |

### LucR

| Experiment | Time | Condition | A       | B       | C       | Mean    | SD    |
|------------|------|-----------|---------|---------|---------|---------|-------|
| 1          | 4h   | Normoxia  | 89 743  | 98 302  | 91 878  | 93 308  | 4455  |
|            |      | Hypoxia   | 109 876 | 111 252 | 98 034  | 106 387 | 7267  |
|            | 8h   | Normoxia  | 146 589 | 149 931 | 129 865 | 142 128 | 10751 |
|            |      | Hypoxia   | 124 357 | 130 350 | 152 345 | 135 684 | 14737 |
|            | 24h  | Normoxia  | 116 853 | 120 498 | 124 567 | 120 639 | 3859  |
|            |      | Hypoxia   | 182 431 | 173 530 | 165 431 | 173 797 | 8503  |
| 2          | 4h   | Normoxia  | 104 059 | 102 906 | 102 632 | 103 199 | 757   |
|            |      | Hypoxia   | 109 548 | 111 252 | 120 034 | 113 611 | 5627  |
|            | 8h   | Normoxia  | 84 185  | 90 263  | 75623   | 83 357  | 7355  |
|            |      | Hypoxia   | 85 227  | 82 565  | 78 265  | 82 019  | 3513  |
|            | 24h  | Normoxia  | 226 539 | 198 256 | 161 526 | 195 440 | 32598 |
|            |      | Hypoxia   | 245 261 | 256 154 | 198 782 | 233 399 | 30470 |
| 3          | 4h   | Normoxia  | 80 652  | 78 568  | 70 687  | 76 636  | 5256  |
|            |      | Hypoxia   | 85 698  | 90 565  | 84 568  | 86 944  | 3187  |
|            | 8h   | Normoxia  | 80 256  | 77 895  | 79 568  | 79 240  | 1214  |
|            |      | Hypoxia   | 80 268  | 82 568  | 79 635  | 80 824  | 1543  |
|            | 24h  | Normoxia  | 178 258 | 170 625 | 168 262 | 172 382 | 5224  |
|            |      | Hypoxia   | 258 684 | 298 365 | 224 265 | 260 438 | 37081 |

### LucF/ LucR

|            |      |           | Biological replicates |        |        |        |        | AU :<br>LucF/LucR<br>*100 |      |        |              |      |
|------------|------|-----------|-----------------------|--------|--------|--------|--------|---------------------------|------|--------|--------------|------|
| Experiment | Time | Condition | A                     | B      | C      | Mean   | SD     | Mean                      | SD   | t-test | Significance | H/N  |
| 1          | 4h   | Normoxia  | 0.1427                | 0.1630 | 0.1808 | 0.1621 | 0.0190 | 16.21                     | 1.90 | 0.010  | **           | 1.48 |
|            |      | Hypoxia   | 0.2402                | 0.2215 | 0.2604 | 0.2407 | 0.0194 | 24.07                     | 1.94 |        |              |      |
|            | 8h   | Normoxia  | 0.1673                | 0.1480 | 0.1651 | 0.1602 | 0.0106 | 16.02                     | 1.06 | 0.021  | *            | 1.35 |
|            |      | Hypoxia   | 0.2445                | 0.2029 | 0.2014 | 0.2163 | 0.0244 | 21.63                     | 2.44 |        |              |      |
|            | 24h  | Normoxia  | 0.2026                | 0.1685 | 0.2508 | 0.2073 | 0.0414 | 20.73                     | 4.14 | 0.270  |              | 0.88 |
|            |      | Hypoxia   | 0.2338                | 0.1478 | 0.1675 | 0.1831 | 0.0450 | 18.31                     | 4.50 |        |              |      |
| 2          | 4h   | Normoxia  | 0.1517                | 0.1520 | 0.1636 | 0.1558 | 0.0067 | 15.58                     | 0.67 | 0.003  | *            | 1.54 |
|            |      | Hypoxia   | 0.2226                | 0.2436 | 0.2525 | 0.2396 | 0.0154 | 23.96                     | 1.54 |        |              |      |
|            | 8h   | Normoxia  | 0.1301                | 0.1271 | 0.1154 | 0.1242 | 0.0078 | 12.42                     | 0.78 | 0.010  | *            | 1.13 |
|            |      | Hypoxia   | 0.1439                | 0.1483 | 0.1295 | 0.1406 | 0.0098 | 14.06                     | 0.98 |        |              |      |
|            | 24h  | Normoxia  | 0.3299                | 0.2926 | 0.2571 | 0.2932 | 0.0364 | 29.32                     | 3.64 | 0.040  | *            | 0.72 |
|            |      | Hypoxia   | 0.1974                | 0.2435 | 0.1885 | 0.2098 | 0.0295 | 20.98                     | 2.95 |        |              |      |
| 3          | 4h   | Normoxia  | 0.1760                | 0.1973 | 0.1744 | 0.1826 | 0.0128 | 18.26                     | 1.28 | 0.035  | *            | 1.39 |
|            |      | Hypoxia   | 0.2216                | 0.2538 | 0.2832 | 0.2529 | 0.0308 | 25.29                     | 3.08 |        |              |      |
|            | 8h   | Normoxia  | 0.1677                | 0.1591 | 0.1574 | 0.1614 | 0.0055 | 16.14                     | 0.55 | 0.023  | *            | 1.22 |
|            |      | Hypoxia   | 0.1886                | 0.2072 | 0.1965 | 0.1974 | 0.0093 | 19.74                     | 0.93 |        |              |      |
|            | 24h  | Normoxia  | 0.3081                | 0.3101 | 0.2992 | 0.3058 | 0.0058 | 30.58                     | 0.58 | 0.292  |              | 0.94 |
|            |      | Hypoxia   | 0.2643                | 0.3480 | 0.2504 | 0.2876 | 0.0528 | 28.76                     | 5.28 |        |              |      |

| Final values |           | AU : LucF/LucR *100 |      |       |        |              |
|--------------|-----------|---------------------|------|-------|--------|--------------|
| Time         | Condition | Total mean          | SD   | ratio | t-test | Significance |
| 4h           | Normoxia  | 16.68               | 1.70 |       | 0.000  | ****         |
|              | Hypoxia   | 24.44               | 2.08 | 1.46  |        |              |
| 8h           | Normoxia  | 14.86               | 1.96 |       | 0.0009 | ****         |
|              | Hypoxia   | 18.48               | 3.69 | 1.24  |        |              |
| 24h          | Normoxia  | 26.88               | 5.41 |       | 0.047  | *            |
|              | Hypoxia   | 22.68               | 6.03 | 0.84  |        |              |

D/ VEGFA IRES a

LucF

| Experiment | Time | Condition | A       | B       | C       | Mean    | SD     |
|------------|------|-----------|---------|---------|---------|---------|--------|
| 1          | 4h   | Normoxia  | 106 987 | 7 470   | 80 384  | 64 947  | 51523  |
|            |      | Hypoxia   | 198 708 | 10 543  | 112 982 | 107 411 | 94206  |
|            | 8h   | Normoxia  | 140 987 | 13 381  | 229 805 | 128 058 | 108790 |
|            |      | Hypoxia   | 291 799 | 15 874  | 217 091 | 174 921 | 142734 |
|            | 24h  | Normoxia  | 95 467  | 11 501  | 66 548  | 57 839  | 42655  |
|            |      | Hypoxia   | 43 998  | 3 278   | 18 093  | 21 790  | 20610  |
| 2          | 4h   | Normoxia  | 80 568  | 75 356  | 78 658  | 78 194  | 2637   |
|            |      | Hypoxia   | 187 525 | 175 862 | 168 568 | 177 318 | 9562   |
|            | 8h   | Normoxia  | 100 578 | 96 235  | 97268   | 98 027  | 2269   |
|            |      | Hypoxia   | 186 568 | 202 525 | 164 570 | 184 554 | 19057  |
|            | 24h  | Normoxia  | 102 540 | 110 402 | 98 758  | 103 900 | 5940   |
|            |      | Hypoxia   | 60 568  | 55 845  | 68 025  | 61 479  | 6141   |
| 3          | 4h   | Normoxia  | 68 256  | 60 658  | 58 698  | 62 537  | 5049   |
|            |      | Hypoxia   | 105 364 | 121 231 | 135 682 | 120 759 | 15165  |
|            | 8h   | Normoxia  | 230 264 | 214 235 | 221 658 | 222 052 | 8022   |
|            |      | Hypoxia   | 402 562 | 380 256 | 351 214 | 378 011 | 25748  |
|            | 24h  | Normoxia  | 125 214 | 123 214 | 110 254 | 119 561 | 8122   |
|            |      | Hypoxia   | 70 658  | 65 252  | 64 154  | 66 688  | 3482   |

LucR

| Experiment | Time | Condition | A         | B         | C         | Mean      | SD     |
|------------|------|-----------|-----------|-----------|-----------|-----------|--------|
| 1          | 4h   | Normoxia  | 557 863   | 620 150   | 654 367   | 610 793   | 48928  |
|            |      | Hypoxia   | 1 387 607 | 1 255 594 | 987 656   | 1 210 286 | 203789 |
|            | 8h   | Normoxia  | 1 098 767 | 1 618 781 | 1 579 760 | 1 432 436 | 289624 |
|            |      | Hypoxia   | 1 465 480 | 1 285 249 | 1 354 320 | 1 368 350 | 90931  |
|            | 24h  | Normoxia  | 1 246 587 | 1 620 876 | 1 674 890 | 1 514 118 | 233257 |
|            |      | Hypoxia   | 1 054 689 | 879 823   | 987 698   | 974 070   | 88226  |
| 2          | 4h   | Normoxia  | 512 362   | 458 685   | 398 568   | 456 538   | 56927  |
|            |      | Hypoxia   | 985 365   | 987 878   | 865 258   | 946 167   | 70081  |
|            | 8h   | Normoxia  | 758 652   | 684 594   | 705635    | 716 294   | 38162  |
|            |      | Hypoxia   | 1 025 268 | 985 698   | 1 014 254 | 1 008 407 | 20423  |
|            | 24h  | Normoxia  | 878 985   | 985 635   | 868 457   | 911 026   | 64828  |
|            |      | Hypoxia   | 1 121 245 | 1 002 568 | 987 685   | 1 037 166 | 73194  |
| 3          | 4h   | Normoxia  | 369 568   | 398 658   | 405 235   | 391 154   | 18981  |
|            |      | Hypoxia   | 875 698   | 870 258   | 865 234   | 870 397   | 5233   |
|            | 8h   | Normoxia  | 656 265   | 652 485   | 698 584   | 669 111   | 25594  |
|            |      | Hypoxia   | 878 258   | 852 012   | 878 565   | 869 612   | 15243  |
|            | 24h  | Normoxia  | 758 587   | 765 625   | 720 258   | 748 157   | 24416  |
|            |      | Hypoxia   | 975 685   | 985 625   | 945 252   | 968 854   | 21035  |

LucF/ LucR

|            |      |           | Biological replicates |        |        |        | AU : LucF/LucR *100 |       |      |        |              |      |
|------------|------|-----------|-----------------------|--------|--------|--------|---------------------|-------|------|--------|--------------|------|
| Experiment | Time | Condition | A                     | B      | C      | Mean   | SD                  | Mean  | SD   | t-test | Significance | H/N  |
| 1          | 4h   | Normoxia  | 0.1918                | 0.0120 | 0.1228 | 0.1089 | 0.0907              | 10.89 | 9.07 | 0.146  |              | 0.81 |
|            |      | Hypoxia   | 0.1432                | 0.0084 | 0.1144 | 0.0887 | 0.0710              | 8.87  | 7.10 |        |              |      |
|            | 8h   | Normoxia  | 0.1283                | 0.0083 | 0.1455 | 0.0940 | 0.0748              | 9.40  | 7.48 | 0.143  |              | 1.32 |
|            |      | Hypoxia   | 0.1991                | 0.0124 | 0.1603 | 0.1239 | 0.0986              | 12.39 | 9.86 |        |              |      |
|            | 24h  | Normoxia  | 0.0766                | 0.0071 | 0.0397 | 0.0411 | 0.0348              | 4.11  | 3.48 | 0.081  |              | 0.52 |
|            |      | Hypoxia   | 0.0417                | 0.0037 | 0.0183 | 0.0213 | 0.0192              | 2.13  | 1.92 |        |              |      |
| 2          | 4h   | Normoxia  | 0.1572                | 0.1643 | 0.1974 | 0.1730 | 0.0214              | 17.30 | 2.14 | 0.144  |              | 1.09 |
|            |      | Hypoxia   | 0.1903                | 0.1780 | 0.1948 | 0.1877 | 0.0087              | 18.77 | 0.87 |        |              |      |
|            | 8h   | Normoxia  | 0.1326                | 0.1406 | 0.1378 | 0.1370 | 0.0041              | 13.70 | 0.41 | 0.030  | *            | 1.34 |
|            |      | Hypoxia   | 0.1820                | 0.2055 | 0.1623 | 0.1832 | 0.0216              | 18.32 | 2.16 |        |              |      |
|            | 24h  | Normoxia  | 0.1167                | 0.1120 | 0.1137 | 0.1141 | 0.0024              | 11.41 | 0.24 | 0.004  | ***          | 0.52 |
|            |      | Hypoxia   | 0.0540                | 0.0557 | 0.0689 | 0.0595 | 0.0081              | 5.95  | 0.81 |        |              |      |
| 3          | 4h   | Normoxia  | 0.1847                | 0.1522 | 0.1448 | 0.1606 | 0.0212              | 16.06 | 2.12 | 0.218  |              | 0.86 |
|            |      | Hypoxia   | 0.1203                | 0.1393 | 0.1568 | 0.1388 | 0.0183              | 13.88 | 1.83 |        |              |      |
|            | 8h   | Normoxia  | 0.3509                | 0.3283 | 0.3173 | 0.3322 | 0.0171              | 33.22 | 1.71 | 0.005  | **           | 1.31 |
|            |      | Hypoxia   | 0.4584                | 0.4463 | 0.3998 | 0.4348 | 0.0309              | 43.48 | 3.09 |        |              |      |
|            | 24h  | Normoxia  | 0.1651                | 0.1609 | 0.1531 | 0.1597 | 0.0061              | 15.97 | 0.61 | 0.001  | ****         | 0.43 |
|            |      | Hypoxia   | 0.0724                | 0.0662 | 0.0679 | 0.0688 | 0.0032              | 6.88  | 0.32 |        |              |      |

| Final values |           | AU : LucF/LucR *100 |       |       |        |              |  |
|--------------|-----------|---------------------|-------|-------|--------|--------------|--|
| Time         | Condition | Total mean          | SD    | ratio | t-test | Significance |  |
| 4h           | Normoxia  | 14.75               | 5.61  | 0.94  | 0.718  |              |  |
|              | Hypoxia   | 13.84               | 5.66  |       |        |              |  |
| 8h           | Normoxia  | 18.77               | 11.64 | 1.32  | 0.001  | ***          |  |
|              | Hypoxia   | 24.73               | 15.24 |       |        |              |  |
| 24h          | Normoxia  | 10.50               | 5.47  | 0.48  | 0.0002 | ****         |  |
|              | Hypoxia   | 4.99                | 2.42  |       |        |              |  |

E/ VEGFA IRES b

LucF

| Experiment | Time | Condition | A       | B       | C       | Mean    | SD    |
|------------|------|-----------|---------|---------|---------|---------|-------|
| 1          | 4h   | Normoxia  | 140 874 | 98 149  | 100 854 | 113 292 | 23925 |
|            |      | Hypoxia   | 100 976 | 91 883  | 93 743  | 95 534  | 4804  |
|            | 8h   | Normoxia  | 159 873 | 208 754 | 170 983 | 179 870 | 25624 |
|            |      | Hypoxia   | 378 983 | 513 871 | 389 750 | 427 535 | 74963 |
|            | 24h  | Normoxia  | 499 864 | 537 099 | 556 098 | 531 020 | 28606 |
|            |      | Hypoxia   | 350 980 | 439 788 | 345 230 | 378 666 | 53011 |
| 2          | 4h   | Normoxia  | 102 368 | 112 327 | 106 258 | 106 984 | 5019  |
|            |      | Hypoxia   | 86 358  | 87 652  | 85 365  | 86 458  | 1147  |
|            | 8h   | Normoxia  | 130 254 | 112 584 | 112 547 | 118 462 | 10212 |
|            |      | Hypoxia   | 298 654 | 305 265 | 300 245 | 301 388 | 3451  |
|            | 24h  | Normoxia  | 498 567 | 465 856 | 475 554 | 479 992 | 16801 |
|            |      | Hypoxia   | 345 268 | 344 568 | 324 265 | 338 034 | 11929 |
| 3          | 4h   | Normoxia  | 104 241 | 124 251 | 114 212 | 114 235 | 10005 |
|            |      | Hypoxia   | 80 242  | 78 658  | 81 542  | 80 147  | 1444  |
|            | 8h   | Normoxia  | 124 212 | 110 226 | 102 265 | 112 234 | 11110 |
|            |      | Hypoxia   | 310 245 | 302 142 | 298 265 | 303 551 | 6113  |
|            | 24h  | Normoxia  | 487 568 | 452 028 | 435 982 | 458 526 | 26400 |
|            |      | Hypoxia   | 285 475 | 284 658 | 235 268 | 268 467 | 28754 |

LucR

| Experiment | Time | Condition | A         | B         | C         | Mean      | SD     |
|------------|------|-----------|-----------|-----------|-----------|-----------|--------|
| 1          | 4h   | Normoxia  | 1 087 650 | 2 019 783 | 1 876 580 | 1 661 338 | 501961 |
|            |      | Hypoxia   | 2 098 750 | 2 993 873 | 3 542 712 | 2 878 445 | 728868 |
|            | 8h   | Normoxia  | 2 178 659 | 2 269 092 | 2 157 890 | 2 201 880 | 59126  |
|            |      | Hypoxia   | 2 765 909 | 3 127 386 | 2 987 652 | 2 960 316 | 182282 |
|            | 24h  | Normoxia  | 3 987 600 | 3 794 801 | 3 654 780 | 3 812 394 | 167106 |
|            |      | Hypoxia   | 3 265 890 | 3 614 913 | 2 764 579 | 3 215 127 | 427434 |
| 2          | 4h   | Normoxia  | 986 256   | 968 586   | 987 584   | 980 809   | 10606  |
|            |      | Hypoxia   | 1 987 584 | 1 876 258 | 1 785 625 | 1 883 156 | 101156 |
|            | 8h   | Normoxia  | 1 587 568 | 1 658 258 | 1 785 547 | 1 677 124 | 100329 |
|            |      | Hypoxia   | 2 258 586 | 2 457 268 | 2 358 625 | 2 358 160 | 99342  |
|            | 24h  | Normoxia  | 3 685 658 | 3 545 658 | 3 365 245 | 3 532 187 | 160631 |
|            |      | Hypoxia   | 2 998 586 | 3 058 248 | 3 124 025 | 3 060 286 | 62744  |
| 3          | 4h   | Normoxia  | 876 548   | 857 625   | 985 562   | 906 578   | 69053  |
|            |      | Hypoxia   | 1 685 265 | 1 457 235 | 1 471 457 | 1 537 986 | 127746 |
|            | 8h   | Normoxia  | 1 325 328 | 1 245 258 | 1 475 682 | 1 348 756 | 116985 |
|            |      | Hypoxia   | 2 425 241 | 2 574 625 | 2 145 258 | 2 381 708 | 217969 |
|            | 24h  | Normoxia  | 3 258 654 | 3 214 651 | 3 254 478 | 3 242 594 | 24290  |
|            |      | Hypoxia   | 3 021 214 | 2 875 625 | 2 874 246 | 2 923 695 | 84457  |

LucF/ LucR

|            |      |           | Biological replicates |        |        |        |        |       | AU : LucF/LucR<br>*100 |        |              |      |
|------------|------|-----------|-----------------------|--------|--------|--------|--------|-------|------------------------|--------|--------------|------|
| Experiment | Time | Condition | A                     | B      | C      | Mean   | SD     | Mean  | SD                     | t-test | Significance | H/N  |
| 1          | 4h   | Normoxia  | 0.1295                | 0.0486 | 0.0537 | 0.0773 | 0.0453 | 7.73  | 4.53                   | 0.083  |              | 0.45 |
|            |      | Hypoxia   | 0.0481                | 0.0307 | 0.0265 | 0.0351 | 0.0115 | 3.51  | 1.15                   |        |              |      |
|            | 8h   | Normoxia  | 0.0734                | 0.0920 | 0.0792 | 0.0815 | 0.0095 | 8.15  | 0.95                   | 0.005  | ***          | 1.77 |
|            |      | Hypoxia   | 0.1370                | 0.1643 | 0.1305 | 0.1439 | 0.0180 | 14.39 | 1.80                   |        |              |      |
|            | 24h  | Normoxia  | 0.1254                | 0.1415 | 0.1522 | 0.1397 | 0.0135 | 13.97 | 1.35                   | 0.008  | **           | 0.84 |
|            |      | Hypoxia   | 0.1075                | 0.1217 | 0.1249 | 0.1180 | 0.0093 | 11.80 | 0.93                   |        |              |      |
| 2          | 4h   | Normoxia  | 0.1038                | 0.1160 | 0.1076 | 0.1091 | 0.0062 | 10.91 | 0.62                   | 0.001  | ***          | 0.42 |
|            |      | Hypoxia   | 0.0434                | 0.0467 | 0.0478 | 0.0460 | 0.0023 | 4.60  | 0.23                   |        |              |      |
|            | 8h   | Normoxia  | 0.0820                | 0.0679 | 0.0630 | 0.0710 | 0.0099 | 7.10  | 0.99                   | 0.003  | ***          | 1.80 |
|            |      | Hypoxia   | 0.1322                | 0.1242 | 0.1273 | 0.1279 | 0.0040 | 12.79 | 0.40                   |        |              |      |
|            | 24h  | Normoxia  | 0.1353                | 0.1314 | 0.1413 | 0.1360 | 0.0050 | 13.60 | 0.50                   | 0.026  | *            | 0.81 |
|            |      | Hypoxia   | 0.1151                | 0.1127 | 0.1038 | 0.1105 | 0.0060 | 11.05 | 0.60                   |        |              |      |
| 3          | 4h   | Normoxia  | 0.1189                | 0.1449 | 0.1159 | 0.1266 | 0.0159 | 12.66 | 1.59                   | 0.007  | **           | 0.41 |
|            |      | Hypoxia   | 0.0476                | 0.0540 | 0.0554 | 0.0523 | 0.0042 | 5.23  | 0.42                   |        |              |      |
|            | 8h   | Normoxia  | 0.0937                | 0.0885 | 0.0693 | 0.0838 | 0.0129 | 8.38  | 1.29                   | 0.037  | *            | 1.53 |
|            |      | Hypoxia   | 0.1279                | 0.1174 | 0.1390 | 0.1281 | 0.0108 | 12.81 | 1.08                   |        |              |      |
|            | 24h  | Normoxia  | 0.1496                | 0.1406 | 0.1340 | 0.1414 | 0.0079 | 14.14 | 0.79                   | 0.003  | ***          | 0.65 |
|            |      | Hypoxia   | 0.0945                | 0.0990 | 0.0819 | 0.0918 | 0.0089 | 9.18  | 0.89                   |        |              |      |

| Final values |           | AU : LucF/LucR *100 |      |       |        |              |  |
|--------------|-----------|---------------------|------|-------|--------|--------------|--|
| Time         | Condition | Total mean          | SD   | ratio | t-test | Significance |  |
| 4h           | Normoxia  | 10.43               | 3.25 | 0.43  | 0.0000 | ****         |  |
|              | Hypoxia   | 4.45                | 0.98 |       |        |              |  |
| 8h           | Normoxia  | 7.88                | 1.11 | 1.69  | 0.0000 | ****         |  |
|              | Hypoxia   | 13.33               | 1.33 |       |        |              |  |
| 24h          | Normoxia  | 13.90               | 0.85 | 0.77  | 0.0002 | ****         |  |
|              | Hypoxia   | 10.68               | 1.37 |       |        |              |  |

F/ VEGFC IRES

LucF

| Experiment | Time | Condition | A      | B      | C      | Mean   | SD   |
|------------|------|-----------|--------|--------|--------|--------|------|
| 1          | 4h   | Normoxia  | 17 645 | 16 237 | 15 672 | 16 518 | 1016 |
|            |      | Hypoxia   | 21 673 | 18 377 | 17 834 | 19 295 | 2078 |
|            | 8h   | Normoxia  | 21 673 | 18 377 | 17 834 | 19 295 | 2078 |
|            |      | Hypoxia   | 27 742 | 18 374 | 19 875 | 21 997 | 5032 |
|            | 24h  | Normoxia  | 23 451 | 21 422 | 22 765 | 22 546 | 1032 |
|            |      | Hypoxia   | 30 194 | 22 544 | 26 876 | 26 538 | 3836 |
| 2          | 4h   | Normoxia  | 15 245 | 14 582 | 13 258 | 14 362 | 1012 |
|            |      | Hypoxia   | 19 875 | 18 625 | 17 485 | 18 662 | 1195 |
|            | 8h   | Normoxia  | 20 235 | 20 146 | 19 826 | 20 069 | 215  |
|            |      | Hypoxia   | 26 587 | 21 457 | 20 358 | 22 801 | 3325 |
|            | 24h  | Normoxia  | 21 568 | 20 148 | 18 759 | 20 158 | 1405 |
|            |      | Hypoxia   | 28 568 | 27 532 | 26 352 | 27 484 | 1109 |
| 3          | 4h   | Normoxia  | 18 750 | 16 985 | 19 754 | 18 496 | 1402 |
|            |      | Hypoxia   | 17 258 | 16 238 | 14 587 | 16 028 | 1348 |
|            | 8h   | Normoxia  | 16 987 | 17 258 | 16 784 | 17 010 | 238  |
|            |      | Hypoxia   | 30 268 | 31 245 | 30 216 | 30 576 | 580  |
|            | 24h  | Normoxia  | 19 867 | 20 235 | 28 220 | 22 774 | 4720 |
|            |      | Hypoxia   | 19 287 | 24 568 | 22 586 | 22 147 | 2668 |

LucR

| Experiment | Time | Condition | A       | B       | C       | Mean    | SD    |
|------------|------|-----------|---------|---------|---------|---------|-------|
| 1          | 4h   | Normoxia  | 287 654 | 316 145 | 365 786 | 323 195 | 39540 |
|            |      | Hypoxia   | 302 234 | 354 485 | 345 290 | 334 003 | 27894 |
|            | 8h   | Normoxia  | 425 763 | 455 482 | 480 013 | 453 753 | 27166 |
|            |      | Hypoxia   | 403 294 | 341 909 | 375 634 | 373 612 | 30742 |
|            | 24h  | Normoxia  | 420 632 | 391 071 | 375 100 | 395 601 | 23102 |
|            |      | Hypoxia   | 452 093 | 342 612 | 410 973 | 401 893 | 55302 |
| 2          | 4h   | Normoxia  | 195 685 | 185 247 | 182 457 | 187 796 | 6973  |
|            |      | Hypoxia   | 298 538 | 290 265 | 284 242 | 291 015 | 7177  |
|            | 8h   | Normoxia  | 390 584 | 382 546 | 367 856 | 380 329 | 11525 |
|            |      | Hypoxia   | 390 268 | 352 632 | 342 268 | 361 723 | 25258 |
|            | 24h  | Normoxia  | 410 214 | 402 158 | 402 387 | 404 920 | 4586  |
|            |      | Hypoxia   | 402 358 | 412 586 | 398 574 | 404 506 | 7249  |
| 3          | 4h   | Normoxia  | 205 236 | 204 325 | 210 214 | 206 592 | 3170  |
|            |      | Hypoxia   | 280 142 | 270 268 | 262 874 | 271 095 | 8664  |
|            | 8h   | Normoxia  | 356 258 | 321 252 | 384 276 | 353 929 | 31577 |
|            |      | Hypoxia   | 410 226 | 401 236 | 410 256 | 407 239 | 5199  |
|            | 24h  | Normoxia  | 398 268 | 396 216 | 381 568 | 392 017 | 9107  |
|            |      | Hypoxia   | 398 265 | 396 246 | 362 142 | 385 551 | 20298 |

LucF/ LucR

|            |      |           | Biological replicates |        |        |        |        | AU : LucF/LucR<br>*100 |      |        |              |             |
|------------|------|-----------|-----------------------|--------|--------|--------|--------|------------------------|------|--------|--------------|-------------|
| Experiment | Time | Condition | A                     | B      | C      | Mean   | SD     | Mean                   | SD   | t-test | Significance | H/N         |
| 1          | 4h   | Normoxia  | 0.0613                | 0.0514 | 0.0428 | 0.0518 | 0.0093 | <b>5.18</b>            | 0.93 | 0.083  |              | 1.13        |
|            |      | Hypoxia   | 0.0717                | 0.0518 | 0.0516 | 0.0584 | 0.0115 | <b>5.84</b>            | 1.15 |        |              |             |
|            | 8h   | Normoxia  | 0.0509                | 0.0403 | 0.0372 | 0.0428 | 0.0072 | <b>4.28</b>            | 0.72 | 0.003  | ***          | <b>1.37</b> |
|            |      | Hypoxia   | 0.0688                | 0.0537 | 0.0529 | 0.0585 | 0.0089 | <b>5.85</b>            | 0.89 |        |              |             |
|            | 24h  | Normoxia  | 0.0558                | 0.0548 | 0.0607 | 0.0571 | 0.0032 | <b>5.71</b>            | 0.32 | 0.026  | *            | 1.16        |
|            |      | Hypoxia   | 0.0668                | 0.0658 | 0.0654 | 0.0660 | 0.0007 | <b>6.60</b>            | 0.07 |        |              |             |
| 2          | 4h   | Normoxia  | 0.0779                | 0.0787 | 0.0727 | 0.0764 | 0.0033 | <b>7.64</b>            | 0.33 | 0.004  | ***          | 0.84        |
|            |      | Hypoxia   | 0.0666                | 0.0642 | 0.0615 | 0.0641 | 0.0025 | <b>6.41</b>            | 0.25 |        |              |             |
|            | 8h   | Normoxia  | 0.0518                | 0.0527 | 0.0539 | 0.0528 | 0.0011 | <b>5.28</b>            | 0.11 | 0.045  | *            | <b>1.19</b> |
|            |      | Hypoxia   | 0.0681                | 0.0608 | 0.0595 | 0.0628 | 0.0046 | <b>6.28</b>            | 0.46 |        |              |             |
|            | 24h  | Normoxia  | 0.0526                | 0.0501 | 0.0466 | 0.0498 | 0.0030 | <b>4.98</b>            | 0.30 | 0.001  | ***          | 1.37        |
|            |      | Hypoxia   | 0.0710                | 0.0667 | 0.0661 | 0.0679 | 0.0027 | <b>6.79</b>            | 0.27 |        |              |             |
| 3          | 4h   | Normoxia  | 0.0914                | 0.0831 | 0.0940 | 0.0895 | 0.0057 | <b>8.95</b>            | 0.57 | 0.010  | *            | 0.66        |
|            |      | Hypoxia   | 0.0616                | 0.0601 | 0.0555 | 0.0591 | 0.0032 | <b>5.91</b>            | 0.32 |        |              |             |
|            | 8h   | Normoxia  | 0.0477                | 0.0537 | 0.0437 | 0.0484 | 0.0051 | <b>4.84</b>            | 0.51 | 0.002  | ***          | <b>1.55</b> |
|            |      | Hypoxia   | 0.0738                | 0.0779 | 0.0737 | 0.0751 | 0.0024 | <b>7.51</b>            | 0.24 |        |              |             |
|            | 24h  | Normoxia  | 0.0499                | 0.0511 | 0.0740 | 0.0583 | 0.0136 | <b>5.83</b>            | 1.36 | 0.462  |              | 0.99        |
|            |      | Hypoxia   | 0.0484                | 0.0620 | 0.0624 | 0.0576 | 0.0079 | <b>5.76</b>            | 0.79 |        |              |             |

| Final values |           | AU : LucF/LucR *100 |      |       |        |              |  |
|--------------|-----------|---------------------|------|-------|--------|--------------|--|
| Time         | Condition | Total mean          | SD   | ratio | t-test | Significance |  |
| 4h           | Normoxia  | 7.26                | 1.75 | 0.83  | 0.062  |              |  |
|              | Hypoxia   | 6.05                | 0.67 |       |        |              |  |
| 8h           | Normoxia  | 4.80                | 0.62 | 1.36  | 0.0002 | ****         |  |
|              | Hypoxia   | 6.55                | 0.91 |       |        |              |  |
| 24h          | Normoxia  | 5.50                | 0.82 | 1.16  | 0.031  | *            |  |
|              | Hypoxia   | 6.38                | 0.64 |       |        |              |  |

# G/ VEGFD IRES

## LucF

| Experiment | Time | Condition | A         | B         | C         | Mean      | SD     |
|------------|------|-----------|-----------|-----------|-----------|-----------|--------|
| 1          | 4h   | Normoxia  | 1 123 453 | 1 092 536 | 1 242 342 | 1 152 777 | 79091  |
|            |      | Hypoxia   | 1 087 648 | 1 129 996 | 1 250 434 | 1 156 026 | 84457  |
|            | 8h   | Normoxia  | 899 766   | 837 544   | 657 889   | 798 400   | 125600 |
|            |      | Hypoxia   | 1 141 352 | 977 778   | 855 973   | 991 701   | 143198 |
|            | 24h  | Normoxia  | 1 187 460 | 1 382 536 | 1 289 532 | 1 286 509 | 97573  |
|            |      | Hypoxia   | 521 596   | 706 269   | 506 468   | 578 111   | 111246 |
| 2          | 4h   | Normoxia  | 125 682   | 123 122   | 120 268   | 123 024   | 2708   |
|            |      | Hypoxia   | 110 236   | 112 025   | 99 856    | 107 372   | 6571   |
|            | 8h   | Normoxia  | 89 526    | 75 862    | 78 588    | 81 325    | 7232   |
|            |      | Hypoxia   | 112 252   | 85 211    | 92 252    | 96 572    | 14028  |
|            | 24h  | Normoxia  | 147 214   | 132 250   | 145 258   | 141 574   | 8134   |
|            |      | Hypoxia   | 50 231    | 48 215    | 47 528    | 48 658    | 1405   |
| 3          | 4h   | Normoxia  | 1 252 025 | 985 986   | 1 025 254 | 1 087 755 | 143610 |
|            |      | Hypoxia   | 1 452 638 | 1 258 326 | 1 425 325 | 1 378 763 | 105192 |
|            | 8h   | Normoxia  | 1 418 588 | 1 325 682 | 1 312 022 | 1 352 097 | 57986  |
|            |      | Hypoxia   | 1 912 212 | 1 858 562 | 1 757 552 | 1 842 775 | 78529  |
|            | 24h  | Normoxia  | 1 547 252 | 1 457 258 | 1 325 206 | 1 443 239 | 111685 |
|            |      | Hypoxia   | 485 625   | 465 258   | 475 528   | 475 470   | 10184  |

## LucR

| Experiment | Time | Condition | A          | B          | C          | Mean       | SD      |
|------------|------|-----------|------------|------------|------------|------------|---------|
| 1          | 4h   | Normoxia  | 11 987 690 | 12 069 833 | 12 069 833 | 12 042 452 | 47425   |
|            |      | Hypoxia   | 10 657 845 | 12 059 630 | 11 656 849 | 11 458 108 | 721716  |
|            | 8h   | Normoxia  | 13 799 872 | 14 349 216 | 12 764 891 | 13 637 993 | 804472  |
|            |      | Hypoxia   | 11 678 964 | 10 969 410 | 12 345 654 | 11 664 676 | 688233  |
|            | 24h  | Normoxia  | 14 908 768 | 16 101 138 | 15 779 780 | 15 596 562 | 616939  |
|            |      | Hypoxia   | 8 765 789  | 9 428 743  | 9 076 890  | 9 090 474  | 331686  |
| 2          | 4h   | Normoxia  | 1 265 226  | 1 125 268  | 1 125 363  | 1 171 952  | 80777   |
|            |      | Hypoxia   | 1 025 236  | 989 265    | 1 125 236  | 1 046 579  | 70453   |
|            | 8h   | Normoxia  | 1 325 662  | 1 685 236  | 1 256 364  | 1 422 421  | 230227  |
|            |      | Hypoxia   | 1 152 635  | 1 232 568  | 1 152 332  | 1 179 178  | 46237   |
|            | 24h  | Normoxia  | 1 658 235  | 1 751 820  | 1 256 250  | 1 555 435  | 263293  |
|            |      | Hypoxia   | 895 652    | 952 325    | 875 252    | 907 743    | 39934   |
| 3          | 4h   | Normoxia  | 10 252 682 | 9 253 258  | 11 220 214 | 10 242 051 | 983521  |
|            |      | Hypoxia   | 11 212 241 | 13 258 233 | 12 258 225 | 12 242 900 | 1023082 |
|            | 8h   | Normoxia  | 12 452 120 | 11 572 582 | 11 457 582 | 11 827 428 | 544046  |
|            |      | Hypoxia   | 10 214 785 | 9 865 236  | 11 525 852 | 10 535 291 | 875474  |
|            | 24h  | Normoxia  | 10 475 685 | 11 452 232 | 10 254 362 | 10 727 426 | 637380  |
|            |      | Hypoxia   | 9 258 352  | 8 562 265  | 8 956 825  | 8 925 814  | 349078  |

## LucF/ LucR

|            |      |           | Biological replicates |        |        | AU : LucF/LucR *100 |        |       |      |        |              |      |
|------------|------|-----------|-----------------------|--------|--------|---------------------|--------|-------|------|--------|--------------|------|
| Experiment | Time | Condition | A                     | B      | C      | Mean                | SD     | Mean  | SD   | t-test | Significance | H/N  |
| 1          | 4h   | Normoxia  | 0.0937                | 0.0905 | 0.1029 | 0.0957              | 0.0064 | 9.57  | 0.64 | 0.039  | *            | 1.06 |
|            |      | Hypoxia   | 0.1021                | 0.0937 | 0.1073 | 0.1010              | 0.0068 | 10.10 | 0.68 |        |              |      |
|            | 8h   | Normoxia  | 0.0652                | 0.0584 | 0.0515 | 0.0584              | 0.0068 | 5.84  | 0.68 | 0.014  | *            | 1.46 |
|            |      | Hypoxia   | 0.0977                | 0.0891 | 0.0693 | 0.0854              | 0.0146 | 8.54  | 1.46 |        |              |      |
|            | 24h  | Normoxia  | 0.0796                | 0.0859 | 0.0817 | 0.0824              | 0.0032 | 8.24  | 0.32 | 0.024  | *            | 0.77 |
|            |      | Hypoxia   | 0.0595                | 0.0749 | 0.0558 | 0.0634              | 0.0101 | 6.34  | 1.01 |        |              |      |
| 2          | 4h   | Normoxia  | 0.0993                | 0.1094 | 0.1069 | 0.1052              | 0.0052 | 10.52 | 0.52 | 0.413  |              | 0.98 |
|            |      | Hypoxia   | 0.1075                | 0.1132 | 0.0887 | 0.1032              | 0.0128 | 10.32 | 1.28 |        |              |      |
|            | 8h   | Normoxia  | 0.0675                | 0.0450 | 0.0626 | 0.0584              | 0.0118 | 5.84  | 1.18 | 0.011  | *            | 1.41 |
|            |      | Hypoxia   | 0.0974                | 0.0691 | 0.0801 | 0.0822              | 0.0142 | 8.22  | 1.42 |        |              |      |
|            | 24h  | Normoxia  | 0.0888                | 0.0755 | 0.1156 | 0.0933              | 0.0204 | 9.33  | 2.04 | 0.035  | *            | 0.58 |
|            |      | Hypoxia   | 0.0561                | 0.0506 | 0.0543 | 0.0537              | 0.0028 | 5.37  | 0.28 |        |              |      |
| 3          | 4h   | Normoxia  | 0.1221                | 0.1066 | 0.0914 | 0.1067              | 0.0154 | 10.67 | 1.54 | 0.290  |              | 1.06 |
|            |      | Hypoxia   | 0.1296                | 0.0949 | 0.1163 | 0.1136              | 0.0175 | 11.36 | 1.75 |        |              |      |
|            | 8h   | Normoxia  | 0.1139                | 0.1146 | 0.1145 | 0.1143              | 0.0004 | 11.43 | 0.04 | 0.018  | *            | 1.54 |
|            |      | Hypoxia   | 0.1872                | 0.1884 | 0.1525 | 0.1760              | 0.0204 | 17.60 | 2.04 |        |              |      |
|            | 24h  | Normoxia  | 0.1477                | 0.1272 | 0.1292 | 0.1347              | 0.0113 | 13.47 | 1.13 | 0.004  | ***          | 0.40 |
|            |      | Hypoxia   | 0.0525                | 0.0543 | 0.0531 | 0.0533              | 0.0010 | 5.33  | 0.10 |        |              |      |

| Final values |           | AU : LucF/LucR *100 |      |       |        |              |  |
|--------------|-----------|---------------------|------|-------|--------|--------------|--|
| Time         | Condition | Total mean          | SD   | ratio | t-test | Significance |  |
| 4h           | Normoxia  | 10.25               | 1.01 | 1.03  | 0.435  |              |  |
|              | Hypoxia   | 10.59               | 1.28 |       |        |              |  |
| 8h           | Normoxia  | 7.70                | 2.88 | 1.49  | 0.0008 | ****         |  |
|              | Hypoxia   | 11.45               | 4.83 |       |        |              |  |
| 24h          | Normoxia  | 10.35               | 2.67 | 0.55  | 0.002  | ***          |  |
|              | Hypoxia   | 5.68                | 0.72 |       |        |              |  |

H/ c-myc IRES

LucF

| Experiment | Time | Condition | A         | B         | C         | Mean      | SD      |
|------------|------|-----------|-----------|-----------|-----------|-----------|---------|
| 1          | 4h   | Normoxia  | 2 567 872 | 3 651 734 | 3 454 332 | 3 224 646 | 577283  |
|            |      | Hypoxia   | 2 029 809 | 3 147 437 | 3 256 210 | 2 811 152 | 678845  |
|            | 8h   | Normoxia  | 3 546 872 | 3 161 720 | 3 478 284 | 3 395 625 | 205450  |
|            |      | Hypoxia   | 3 508 730 | 2 749 546 | 2 876 921 | 3 045 066 | 406564  |
|            | 24h  | Normoxia  | 7 768 312 | 8 684 097 | 6 987 312 | 7 813 240 | 849284  |
|            |      | Hypoxia   | 7 513 771 | 5 782 962 | 7 981 903 | 7 092 879 | 1158317 |
| 2          | 4h   | Normoxia  | 356 812   | 375 210   | 351 278   | 361 100   | 12529   |
|            |      | Hypoxia   | 275 895   | 265 826   | 245 628   | 262 450   | 15413   |
|            | 8h   | Normoxia  | 368 258   | 450 268   | 452 025   | 423 517   | 47864   |
|            |      | Hypoxia   | 325 120   | 301 245   | 298 547   | 308 304   | 14625   |
|            | 24h  | Normoxia  | 358 582   | 258 625   | 247 583   | 288 263   | 61148   |
|            |      | Hypoxia   | 486 250   | 460 258   | 410 258   | 452 255   | 38623   |
| 3          | 4h   | Normoxia  | 360 212   | 410 251   | 420 215   | 396 893   | 32155   |
|            |      | Hypoxia   | 310 215   | 325 230   | 312 020   | 315 822   | 8198    |
|            | 8h   | Normoxia  | 415 231   | 398 652   | 350 652   | 388 178   | 33539   |
|            |      | Hypoxia   | 350 655   | 316 522   | 310 222   | 325 800   | 21755   |
|            | 24h  | Normoxia  | 362 025   | 352 014   | 342 062   | 352 034   | 9982    |
|            |      | Hypoxia   | 658 250   | 568 260   | 487 210   | 571 240   | 85559   |

LucR

| Experiment | Time | Condition | A          | B          | C          | Mean       | SD      |
|------------|------|-----------|------------|------------|------------|------------|---------|
| 1          | 4h   | Normoxia  | 29 784 420 | 27 508 124 | 26 098 324 | 27 796 956 | 1859945 |
|            |      | Hypoxia   | 20 988 822 | 19 862 926 | 21 341 228 | 20 730 992 | 772141  |
|            | 8h   | Normoxia  | 24 900 832 | 29 630 539 | 30 983 221 | 28 504 864 | 3193622 |
|            |      | Hypoxia   | 23 987 042 | 24 750 406 | 25 987 577 | 24 908 342 | 1009576 |
|            | 24h  | Normoxia  | 36 987 908 | 35 408 692 | 23 788 902 | 32 061 834 | 7207949 |
|            |      | Hypoxia   | 18 898 912 | 13 608 479 | 16 988 904 | 16 498 765 | 2679057 |
| 2          | 4h   | Normoxia  | 3 025 325  | 2 758 632  | 2 658 985  | 2 814 314  | 189411  |
|            |      | Hypoxia   | 2 025 128  | 2 212 570  | 2 325 201  | 2 187 633  | 151583  |
|            | 8h   | Normoxia  | 2 856 985  | 2 140 236  | 2 562 120  | 2 519 780  | 360245  |
|            |      | Hypoxia   | 2 653 213  | 2 012 251  | 2 120 124  | 2 261 863  | 343184  |
|            | 24h  | Normoxia  | 3 856 658  | 4 021 522  | 4 010 698  | 3 962 959  | 92219   |
|            |      | Hypoxia   | 4 582 632  | 4 658 230  | 4 215 120  | 4 485 327  | 237040  |
| 3          | 4h   | Normoxia  | 2 879 258  | 2 586 258  | 2 586 258  | 2 683 925  | 169164  |
|            |      | Hypoxia   | 2 145 251  | 2 014 214  | 2 147 542  | 2 102 336  | 76324   |
|            | 8h   | Normoxia  | 3 125 368  | 2 582 321  | 2 836 124  | 2 847 938  | 271716  |
|            |      | Hypoxia   | 2 785 624  | 2 658 325  | 2 625 258  | 2 689 736  | 84672   |
|            | 24h  | Normoxia  | 4 025 215  | 4 085 368  | 4 125 214  | 4 078 599  | 50342   |
|            |      | Hypoxia   | 4 658 284  | 4 075 250  | 4 875 251  | 4 536 262  | 413724  |

LucF/ LucR

|            |      |           | Biological replicates |        |        |        |        | AU : LucF/LucR<br>*100 |      |        |              |      |
|------------|------|-----------|-----------------------|--------|--------|--------|--------|------------------------|------|--------|--------------|------|
| Experiment | Time | Condition | A                     | B      | C      | Mean   | SD     | Mean                   | SD   | t-test | Significance | H/N  |
| 1          | 4h   | Normoxia  | 0.0862                | 0.1328 | 0.1324 | 0.1171 | 0.0268 | 11.71                  | 2.68 | 0.026  | *            | 1.16 |
|            |      | Hypoxia   | 0.0967                | 0.1585 | 0.1526 | 0.1359 | 0.0341 | 13.59                  | 3.41 |        |              |      |
|            | 8h   | Normoxia  | 0.1424                | 0.1067 | 0.1123 | 0.1205 | 0.0192 | 12.05                  | 1.92 | 0.181  |              | 1.02 |
|            |      | Hypoxia   | 0.1463                | 0.1111 | 0.1107 | 0.1227 | 0.0204 | 12.27                  | 2.04 |        |              |      |
|            | 24h  | Normoxia  | 0.2100                | 0.2453 | 0.2937 | 0.2497 | 0.0420 | 24.97                  | 4.20 | 0.0002 | ****         | 1.73 |
|            |      | Hypoxia   | 0.3976                | 0.4250 | 0.4698 | 0.4308 | 0.0365 | 43.08                  | 3.65 |        |              |      |
| 2          | 4h   | Normoxia  | 0.1179                | 0.1360 | 0.1321 | 0.1287 | 0.0095 | 12.87                  | 0.95 | 0.307  |              | 0.94 |
|            |      | Hypoxia   | 0.1362                | 0.1201 | 0.1056 | 0.1207 | 0.0153 | 12.07                  | 1.53 |        |              |      |
|            | 8h   | Normoxia  | 0.1289                | 0.2104 | 0.1764 | 0.1719 | 0.0409 | 17.19                  | 4.09 | 0.081  |              | 0.80 |
|            |      | Hypoxia   | 0.1225                | 0.1497 | 0.1408 | 0.1377 | 0.0139 | 13.77                  | 1.39 |        |              |      |
|            | 24h  | Normoxia  | 0.0930                | 0.0643 | 0.0617 | 0.0730 | 0.0173 | 7.30                   | 1.73 | 0.031  | *            | 1.38 |
|            |      | Hypoxia   | 0.1061                | 0.0988 | 0.0973 | 0.1007 | 0.0047 | 10.07                  | 0.47 |        |              |      |
| 3          | 4h   | Normoxia  | 0.1251                | 0.1586 | 0.1625 | 0.1487 | 0.0206 | 14.87                  | 2.06 | 0.443  |              | 1.01 |
|            |      | Hypoxia   | 0.1446                | 0.1615 | 0.1453 | 0.1505 | 0.0095 | 15.05                  | 0.95 |        |              |      |
|            | 8h   | Normoxia  | 0.1329                | 0.1544 | 0.1236 | 0.1370 | 0.0158 | 13.70                  | 1.58 | 0.121  |              | 0.88 |
|            |      | Hypoxia   | 0.1259                | 0.1191 | 0.1182 | 0.1210 | 0.0042 | 12.10                  | 0.42 |        |              |      |
|            | 24h  | Normoxia  | 0.0899                | 0.0862 | 0.0829 | 0.0863 | 0.0035 | 8.63                   | 0.35 | 0.038  | *            | 1.47 |
|            |      | Hypoxia   | 0.1413                | 0.1394 | 0.0999 | 0.1269 | 0.0234 | 12.69                  | 2.34 |        |              |      |

| Final values |           | AU : LucF/LucR *100 |       |       |        |              |
|--------------|-----------|---------------------|-------|-------|--------|--------------|
| Time         | Condition | Total mean          | SD    | ratio | t-test | Significance |
| 4h           | Normoxia  | 13.15               | 2.23  | 1.03  | 0.536  |              |
|              | Hypoxia   | 13.57               | 2.32  |       |        |              |
| 8h           | Normoxia  | 14.31               | 3.30  | 0.89  | 0.066  |              |
|              | Hypoxia   | 12.71               | 1.48  |       |        |              |
| 24h          | Normoxia  | 13.63               | 8.82  | 1.61  | 0.010  | *            |
|              | Hypoxia   | 21.95               | 16.04 |       |        |              |

I/ EMCV IRES

LucF

| Experiment | Time | Condition | A         | B         | C         | Mean      | SD     |
|------------|------|-----------|-----------|-----------|-----------|-----------|--------|
| 1          | 4h   | Normoxia  | 1 698 754 | 1 842 473 | 1 523 420 | 1 688 216 | 159787 |
|            |      | Hypoxia   | 1 768 791 | 1 848 197 | 1 212 320 | 1 609 769 | 346483 |
|            | 8h   | Normoxia  | 2 453 998 | 2 217 362 | 2 178 642 | 2 283 334 | 149062 |
|            |      | Hypoxia   | 1 098 422 | 1 388 910 | 1 053 523 | 1 180 285 | 182064 |
|            | 24h  | Normoxia  | 2 987 530 | 3 331 188 | 3 097 981 | 3 138 900 | 175445 |
|            |      | Hypoxia   | 3 208 903 | 3 551 010 | 3 254 552 | 3 338 155 | 185746 |
| 2          | 4h   | Normoxia  | 1 852 625 | 1 798 265 | 1 658 985 | 1 769 958 | 99875  |
|            |      | Hypoxia   | 1 658 986 | 1 725 542 | 1 875 258 | 1 753 262 | 110769 |
|            | 8h   | Normoxia  | 2 547 240 | 2 580 264 | 1 985 520 | 2 371 008 | 334250 |
|            |      | Hypoxia   | 1 658 250 | 1 752 220 | 1 425 632 | 1 612 034 | 168128 |
|            | 24h  | Normoxia  | 2 658 568 | 2 784 240 | 2 645 280 | 2 696 029 | 76681  |
|            |      | Hypoxia   | 2 985 568 | 3 025 106 | 3 685 210 | 3 231 961 | 393022 |
| 3          | 4h   | Normoxia  | 1 985 625 | 1 895 032 | 1 758 320 | 1 879 659 | 114430 |
|            |      | Hypoxia   | 1 254 214 | 1 158 220 | 1 258 210 | 1 223 548 | 56611  |
|            | 8h   | Normoxia  | 2 652 124 | 2 758 210 | 2 650 210 | 2 686 848 | 61809  |
|            |      | Hypoxia   | 1 452 025 | 1 252 620 | 1 158 203 | 1 287 616 | 150005 |
|            | 24h  | Normoxia  | 2 875 620 | 2 750 215 | 2 458 982 | 2 694 939 | 213748 |
|            |      | Hypoxia   | 3 025 240 | 2 920 213 | 3 857 920 | 3 267 791 | 513758 |

LucR

| Experiment | Time | Condition | A         | B         | C         | Mean      | SD     |
|------------|------|-----------|-----------|-----------|-----------|-----------|--------|
| 1          | 4h   | Normoxia  | 1 897 642 | 1 739 558 | 1 676 425 | 1 771 208 | 113954 |
|            |      | Hypoxia   | 1 497 245 | 1 416 380 | 1 123 235 | 1 345 620 | 196789 |
|            | 8h   | Normoxia  | 2 453 210 | 2 270 622 | 1 987 430 | 2 237 087 | 234694 |
|            |      | Hypoxia   | 1 345 232 | 1 423 859 | 1 125 412 | 1 298 168 | 154690 |
|            | 24h  | Normoxia  | 2 234 123 | 2 586 791 | 3 142 423 | 2 654 446 | 457914 |
|            |      | Hypoxia   | 2 076 764 | 1 593 918 | 2 090 845 | 1 920 509 | 282924 |
| 2          | 4h   | Normoxia  | 1 325 225 | 1 250 265 | 1 325 052 | 1 300 181 | 43228  |
|            |      | Hypoxia   | 998 565   | 865 258   | 1 125 580 | 996 468   | 130174 |
|            | 8h   | Normoxia  | 2 025 872 | 2 125 672 | 2 110 253 | 2 087 266 | 53725  |
|            |      | Hypoxia   | 1 257 253 | 1 520 252 | 1 427 856 | 1 401 787 | 133423 |
|            | 24h  | Normoxia  | 1 987 562 | 2 358 268 | 2 145 214 | 2 163 681 | 186042 |
|            |      | Hypoxia   | 2 125 147 | 2 235 126 | 1 989 987 | 2 116 753 | 122785 |
| 3          | 4h   | Normoxia  | 2 015 210 | 1 989 570 | 1 997 212 | 2 000 664 | 13164  |
|            |      | Hypoxia   | 1 328 620 | 1 285 210 | 1 275 487 | 1 296 439 | 28290  |
|            | 8h   | Normoxia  | 2 251 012 | 2 325 026 | 2 452 012 | 2 342 683 | 101657 |
|            |      | Hypoxia   | 1 352 210 | 1 245 253 | 1 124 210 | 1 240 558 | 114072 |
|            | 24h  | Normoxia  | 2 454 210 | 2 325 620 | 2 332 210 | 2 370 680 | 72414  |
|            |      | Hypoxia   | 2 452 012 | 2 145 217 | 2 052 982 | 2 216 737 | 208908 |

LucF/ LucR

|            |      |           | Biological replicates |        |        |        | AU : LucF/LucR *100 |        |       |        |              |      |
|------------|------|-----------|-----------------------|--------|--------|--------|---------------------|--------|-------|--------|--------------|------|
| Experiment | Time | Condition | A                     | B      | C      | Mean   | SD                  | Mean   | SD    | t-test | Significance | H/N  |
| 1          | 4h   | Normoxia  | 0.8952                | 1.0592 | 0.9087 | 0.9544 | 0.0910              | 95.44  | 9.10  | 0.010  | *            | 1.25 |
|            |      | Hypoxia   | 1.1814                | 1.3049 | 1.0793 | 1.1885 | 0.1130              | 118.85 | 11.30 |        |              |      |
|            | 8h   | Normoxia  | 1.0003                | 0.9765 | 1.0962 | 1.0244 | 0.0634              | 102.44 | 6.34  | 0.091  |              | 0.89 |
|            |      | Hypoxia   | 0.8165                | 0.9755 | 0.9361 | 0.9094 | 0.0828              | 90.94  | 8.28  |        |              |      |
|            | 24h  | Normoxia  | 1.3372                | 1.2878 | 0.9859 | 1.2036 | 0.1902              | 120.36 | 19.02 | 0.057  | *            | 1.48 |
|            |      | Hypoxia   | 1.5451                | 2.2278 | 1.5566 | 1.7765 | 0.3909              | 177.65 | 39.09 |        |              |      |
| 2          | 4h   | Normoxia  | 1.3980                | 1.4383 | 1.2520 | 1.3628 | 0.0980              | 136.28 | 9.80  | 0.020  | *            | 1.30 |
|            |      | Hypoxia   | 1.6614                | 1.9943 | 1.6660 | 1.7739 | 0.1909              | 177.39 | 19.09 |        |              |      |
|            | 8h   | Normoxia  | 1.2574                | 1.2139 | 0.9409 | 1.1374 | 0.1715              | 113.74 | 17.15 | 0.340  |              | 1.02 |
|            |      | Hypoxia   | 1.3189                | 1.1526 | 0.9984 | 1.1567 | 0.1603              | 115.67 | 16.03 |        |              |      |
|            | 24h  | Normoxia  | 1.3376                | 1.1806 | 1.2331 | 1.2504 | 0.0799              | 125.04 | 7.99  | 0.116  |              | 1.23 |
|            |      | Hypoxia   | 1.4049                | 1.3534 | 1.8519 | 1.5367 | 0.2741              | 153.67 | 27.41 |        |              |      |
| 3          | 4h   | Normoxia  | 0.9853                | 0.9525 | 0.8804 | 0.9394 | 0.0537              | 93.94  | 5.37  | 0.469  |              | 1.00 |
|            |      | Hypoxia   | 0.9440                | 0.9012 | 0.9865 | 0.9439 | 0.0426              | 94.39  | 4.26  |        |              |      |
|            | 8h   | Normoxia  | 1.1782                | 1.1863 | 1.0808 | 1.1484 | 0.0587              | 114.84 | 5.87  | 0.049  | *            | 0.90 |
|            |      | Hypoxia   | 1.0738                | 1.0059 | 1.0302 | 1.0367 | 0.0344              | 103.67 | 3.44  |        |              |      |
|            | 24h  | Normoxia  | 1.1717                | 1.1826 | 1.0544 | 1.1362 | 0.0711              | 113.62 | 7.11  | 0.136  |              | 1.31 |
|            |      | Hypoxia   | 1.2338                | 1.3613 | 1.8792 | 1.4914 | 0.3418              | 149.14 | 34.18 |        |              |      |

| Final values |           | AU : LucF/LucR *100 |       |       |        |              |
|--------------|-----------|---------------------|-------|-------|--------|--------------|
| Time         | Condition | Total mean          | SD    | ratio | t-test | Significance |
| 4h           | Normoxia  | 108.55              | 22.02 | 1.20  | 0.011  | *            |
|              | Hypoxia   | 130.21              | 38.62 |       |        |              |
| 8h           | Normoxia  | 110.34              | 11.29 | 0.94  | 0.062  |              |
|              | Hypoxia   | 103.42              | 14.11 |       |        |              |
| 24h          | Normoxia  | 119.68              | 11.99 | 1.34  | 0.007  | **           |
|              | Hypoxia   | 160.16              | 32.22 |       |        |              |



## J/ Control without IRES (hairpin)

### LucF

| Experiment | Time | Condition | Biological replicates |      |      | Mean | SD   |
|------------|------|-----------|-----------------------|------|------|------|------|
|            |      |           | A                     | B    | C    |      |      |
| 1          | 8h   | Normoxia  | 2082                  | 2490 | 1901 | 2158 | 302  |
|            |      | Hypoxia   | 1937                  | 3592 | 2125 | 2552 | 906  |
|            | 24h  | Normoxia  | 2262                  | 1232 | 1692 | 1729 | 516  |
|            |      | Hypoxia   | 2063                  | 3082 | 4574 | 3240 | 1263 |
| 2          | 8h   | Normoxia  | 4203                  | 4273 | 3176 | 3884 | 614  |
|            |      | Hypoxia   | 5664                  | 1600 | 4811 | 4025 | 2143 |
| 3          | 8h   | Normoxia  | 5188                  | 5900 | 6041 | 5710 | 457  |
|            |      | Hypoxia   | 3270                  | 4499 | ND   | 3884 | 2015 |

### LucR

| Experiment | Time | Condition | Biological replicates |        |        | Mean   | SD    |
|------------|------|-----------|-----------------------|--------|--------|--------|-------|
|            |      |           | A                     | B      | C      |        |       |
| 1          | 8h   | Normoxia  | 91411                 | 99067  | 79850  | 90109  | 9674  |
|            |      | Hypoxia   | 98850                 | 86360  | 51747  | 78986  | 24402 |
|            | 24h  | Normoxia  | 95815                 | 50314  | 72697  | 72942  | 22752 |
|            |      | Hypoxia   | 49263                 | 68572  | 104606 | 74147  | 28090 |
| 2          | 8h   | Normoxia  | 155803                | 142912 | 127454 | 142056 | 14194 |
|            |      | Hypoxia   | 100895                | 73120  | 120118 | 98044  | 23628 |
| 3          | 8h   | Normoxia  | 163996                | 161011 | 198604 | 174537 | 20896 |
|            |      | Hypoxia   | 69871                 | 75614  | ND     | 72743  | 41668 |

### LucF/ LucR

| Experiment | Time | Condition | Biological replicates |        |        | Mean   | SD     | AU: LucF/LuR<br>*100 |      | t-test | Significance |
|------------|------|-----------|-----------------------|--------|--------|--------|--------|----------------------|------|--------|--------------|
|            |      |           | A                     | B      | C      |        |        | Mean                 | SD   |        |              |
| 1          | 8h   | Normoxia  | 0.0228                | 0.0251 | 0.0238 | 0.0239 | 0.0012 | 2.39                 | 0.12 | 0.833  |              |
|            |      | Hypoxia   | 0.0236                | 0.0245 | 0.0233 | 0.0238 | 0.0006 | 2.38                 | 0.06 |        |              |
|            | 24h  | Normoxia  | 0.0196                | 0.0416 | 0.0411 | 0.0341 | 0.0126 | 3.41                 | 1.26 | 0.280  |              |
|            |      | Hypoxia   | 0.0419                | 0.0449 | 0.0437 | 0.0435 | 0.0015 | 4.35                 | 0.15 |        |              |
| 2          | 8h   | Normoxia  | 0.0270                | 0.0299 | 0.0249 | 0.0273 | 0.0025 | 2.73                 | 0.25 | 0.381  |              |
|            |      | Hypoxia   | 0.0561                | 0.0219 | 0.0400 | 0.0394 | 0.0171 | 3.94                 | 1.71 |        |              |
| 3          | 8h   | Normoxia  | 0.0316                | 0.0366 | 0.0304 | 0.0329 | 0.0033 | 3.29                 | 0.33 | 0.127  |              |
|            |      | Hypoxia   | 0.0468                | 0.0595 | ND     | 0.0531 | 0.0090 | 5.31                 | 0.90 |        |              |

### EV Table 3. IRES activities at different times of hypoxia in HL-1 cells.

Luciferase activity values and IRES activities corresponding to the experiments presented Figure 4.

A/ Kinetics of FGF1 IRES activity from 30 min to 24 h

B-I/ Activities of the different IRES at 4 h, 8 h and 24 h of hypoxia

J/ Negative control with a lentivector containing a hairpin (no IRES) between the two luciferase cistrons.

Biological replicates are indicated as A, B and C, whereas independent experiments are indicated as 1, 2, 3. Means, standard deviation (SD) and t-test of IRES activities were calculated. The panels “final values” correspond to means of all experiments (nine values) which are reported in the histograms of Figure 4. P-value significance is indicated: \* $p < 0.05$ , \*\* $p < 0.01$ , \*\*\* $p < 0.001$ , \*\*\*\* $p < 0.0001$ .

.

## Hantelys, EV Table 4

### A. Proteins bound to FGF1 IRES

| Normoxia (0 h) |                                                                                                                       |       |          |          |
|----------------|-----------------------------------------------------------------------------------------------------------------------|-------|----------|----------|
| Symbol         | Full name                                                                                                             | Score | Spectres | Peptides |
| ASAP2_MOUSE    | Arf-GAP with SH3 domain, ANK repeat and PH domain-containing protein 2 OS=Mus musculus GN=Asap2 PE=1 SV=3             | 29    | 2        | 1        |
| KCTD9_MOUSE    | BTB/POZ domain-containing protein KCTD9 OS=Mus musculus GN=Kctd9 PE=2 SV=1                                            | 23    | 1        | 1        |
| EMAL6_MOUSE    | Echinoderm microtubule-associated protein-like 6 OS=Mus musculus GN=Eml6 PE=2 SV=1                                    | 35    | 1        | 1        |
| EF1A1_MOUSE    | Elongation factor 1-alpha 1 OS=Mus musculus GN=Eef1a1 PE=1 SV=3                                                       | 53    | 1        | 1        |
| H11_MOUSE      | Histone H1.1 OS=Mus musculus GN=Hist1h1a PE=1 SV=2                                                                    | 28    | 1        | 1        |
| GPR19_MOUSE    | Probable G-protein coupled receptor 19 OS=Mus musculus GN=Gpr19 PE=2 SV=2                                             | 22    | 1        | 1        |
| GUF1_MOUSE     | Translation factor Guf1, mitochondrial OS=Mus musculus GN=Guf1 PE=1 SV=1                                              | 13    | 4        | 1        |
| Hypoxia (4 h)  |                                                                                                                       |       |          |          |
| Symbol         | Full name                                                                                                             | Score | Spectres | Peptides |
| ASAP2_MOUSE    | Arf-GAP with SH3 domain, ANK repeat and PH domain-containing protein 2 OS=Mus musculus GN=Asap2 PE=1 SV=3             | 51    | 2        | 2        |
| ATPA_MOUSE     | ATP synthase subunit alpha, mitochondrial OS=Mus musculus GN=Atp5a1 PE=1 SV=1                                         | 52    | 2        | 2        |
| C2C2L_MOUSE    | C2 domain-containing protein 2-like OS=Mus musculus GN=C2cd2l PE=1 SV=3                                               | 25    | 1        | 1        |
| PDE8B_MOUSE    | High affinity cAMP-specific and IBMK-insensitive 3',5'-cyclic phosphodiesterase 8B OS=Mus musculus GN=Pde8b PE=1 SV=1 | 23    | 1        | 1        |
| GVIN1_MOUSE    | Interferon-induced very large GTPase 1 OS=Mus musculus GN=Gvin1 PE=1 SV=1                                             | 29    | 1        | 1        |
| ACOX1_MOUSE    | Peroxisomal acyl-coenzyme A oxidase 1 OS=Mus musculus GN=Acox1 PE=1 SV=5                                              | 23    | 1        | 1        |
| TAM41_MOUSE    | Phosphatidate cytidyltransferase, mitochondrial OS=Mus musculus GN=Tamm41 PE=1 SV=2                                   | 23    | 1        | 1        |
| ALBU_MOUSE     | Serum albumin OS=Mus musculus GN=Alb PE=1 SV=3                                                                        | 35    | 1        | 1        |
| TCPG_MOUSE     | T-complex protein 1 subunit gamma OS=Mus musculus GN=Cct3 PE=1 SV=1                                                   | 28    | 1        | 1        |
| VASH1_MOUSE    | Vasohibin-1 OS=Mus musculus GN=Vash1 PE=2 SV=4                                                                        | 26    | 2        | 1        |
| Normoxia (4 h) |                                                                                                                       |       |          |          |
| Symbol         | Full name                                                                                                             | Score | Spectres | Peptides |
| ASAP2_MOUSE    | Arf-GAP with SH3 domain, ANK repeat and PH domain-containing protein 2 OS=Mus musculus GN=Asap2 PE=1 SV=3             | 48    | 1        | 1        |
| EMAL6_MOUSE    | Echinoderm microtubule-associated protein-like 6 OS=Mus musculus GN=Eml6 PE=2 SV=1                                    | 43    | 2        | 1        |
| FXL14_MOUSE    | F-box/LRR-repeat protein 14 OS=Mus musculus GN=Fbxl14 PE=2 SV=1                                                       | 15    | 1        | 1        |
| BRCC3_MOUSE    | Lys-63-specific deubiquitinase BRCC36 OS=Mus musculus GN=Brcc3 PE=1 SV=1                                              | 20    | 1        | 1        |
| MYBA_MOUSE     | Myb-related protein A OS=Mus musculus GN=Myb1 PE=1 SV=2                                                               | 26    | 1        | 1        |
| NUDC2_MOUSE    | NudC domain-containing protein 2 OS=Mus musculus GN=Nudcd2 PE=1 SV=1                                                  | 17    | 1        | 1        |
| GUF1_MOUSE     | Translation factor Guf1, mitochondrial OS=Mus musculus GN=Guf1 PE=1 SV=1                                              | 14    | 25       | 1        |
| TMPSD_MOUSE    | Transmembrane protease serine 13 OS=Mus musculus GN=Tmprss13 PE=2 SV=2                                                | 15    | 1        | 1        |
| Hypoxia (8 h)  |                                                                                                                       |       |          |          |
| Symbol         | Full name                                                                                                             | Score | Spectres | Peptides |
| ACTA_MOUSE     | Actin, aortic smooth muscle OS=Mus musculus GN=Acta2 PE=1 SV=1                                                        | 36    | 1        | 1        |
| ADT1_MOUSE     | ADP/ATP translocase 1 OS=Mus musculus GN=Slc25a4 PE=1 SV=4                                                            | 32    | 1        | 1        |
| ASAP2_MOUSE    | Arf-GAP with SH3 domain, ANK repeat and PH domain-containing protein 2 OS=Mus musculus GN=Asap2 PE=1 SV=3             | 51    | 2        | 2        |
| C2C2L_MOUSE    | C2 domain-containing protein 2-like OS=Mus musculus GN=C2cd2l PE=1 SV=3                                               | 22    | 1        | 1        |
| CSPRS_MOUSE    | Component of Sp100-rs OS=Mus musculus GN=Csprs PE=2 SV=1                                                              | 23    | 1        | 1        |
| MCM8_MOUSE     | DNA helicase MCM8 OS=Mus musculus GN=Mcm8 PE=1 SV=3                                                                   | 25    | 1        | 1        |
| EMAL6_MOUSE    | Echinoderm microtubule-associated protein-like 6 OS=Mus musculus GN=Eml6 PE=2 SV=1                                    | 34    | 2        | 1        |
| GKAP1_MOUSE    | G kinase-anchoring protein 1 OS=Mus musculus GN=Gkap1 PE=1 SV=1                                                       | 26    | 1        | 1        |
| H1T_MOUSE      | Histone H1t OS=Mus musculus GN=Hist1h1t PE=1 SV=4                                                                     | 41    | 1        | 1        |
| ALBU_MOUSE     | Serum albumin OS=Mus musculus GN=Alb PE=1 SV=3                                                                        | 41    | 1        | 1        |
| SPE39_MOUSE    | Spermatogenesis-defective protein 39 homolog OS=Mus musculus GN=Vipas39 PE=1 SV=1                                     | 20    | 1        | 1        |
| GUF1_MOUSE     | Translation factor Guf1, mitochondrial OS=Mus musculus GN=Guf1 PE=1 SV=1                                              | 22    | 1        | 1        |
| VASH1_MOUSE    | Vasohibin-1 OS=Mus musculus GN=Vash1 PE=2 SV=4                                                                        | 28    | 1        | 1        |

## Normoxia (8 h)

| Symbol      | Full name                                                                                                 | Score | Spectres | Peptides |
|-------------|-----------------------------------------------------------------------------------------------------------|-------|----------|----------|
| RM17_MOUSE  | 39S ribosomal protein L17, mitochondrial OS=Mus musculus GN=Mrlp17 PE=1 SV=1                              | 26    | 1        | 1        |
| RS10_MOUSE  | 40S ribosomal protein S10 OS=Mus musculus GN=Rps10 PE=1 SV=1                                              | 42    | 1        | 1        |
| RS19_MOUSE  | 40S ribosomal protein S19 OS=Mus musculus GN=Rps19 PE=1 SV=3                                              | 41    | 1        | 1        |
| RS4X_MOUSE  | 40S ribosomal protein S4, X isoform OS=Mus musculus GN=Rps4x PE=1 SV=2                                    | 28    | 1        | 1        |
| RS7_MOUSE   | 40S ribosomal protein S7 OS=Mus musculus GN=Rps7 PE=2 SV=1                                                | 57    | 2        | 2        |
| ADT1_MOUSE  | ADP/ATP translocase 1 OS=Mus musculus GN=Slc25a4 PE=1 SV=4                                                | 604   | 9        | 5        |
| ASAP2_MOUSE | Arf-GAP with SH3 domain, ANK repeat and PH domain-containing protein 2 OS=Mus musculus GN=Asap2 PE=1 SV=3 | 83    | 5        | 1        |
| ATPA_MOUSE  | ATP synthase subunit alpha, mitochondrial OS=Mus musculus GN=Atp5a1 PE=1 SV=1                             | 515   | 14       | 10       |
| ATPB_MOUSE  | ATP synthase subunit beta, mitochondrial OS=Mus musculus GN=Atp5b PE=1 SV=2                               | 582   | 15       | 11       |
| ATPG_MOUSE  | ATP synthase subunit gamma, mitochondrial OS=Mus musculus GN=Atp5c1 PE=1 SV=1                             | 67    | 3        | 2        |
| ATPO_MOUSE  | ATP synthase subunit O, mitochondrial OS=Mus musculus GN=Atp5o PE=1 SV=1                                  | 579   | 20       | 9        |
| ATAD3_MOUSE | ATPase family AAA domain-containing protein 3 OS=Mus musculus GN=Atad3 PE=1 SV=1                          | 19    | 1        | 1        |
| CE295_MOUSE | Centrosomal protein of 295 kDa OS=Mus musculus GN=Cep295 PE=1 SV=3                                        | 32    | 4        | 1        |
| CERU_MOUSE  | Ceruloplasmin OS=Mus musculus GN=Cp PE=1 SV=2                                                             | 106   | 5        | 3        |
| CC178_MOUSE | Coiled-coil domain-containing protein 178 OS=Mus musculus GN=Ccdc178 PE=2 SV=2                            | 21    | 1        | 1        |
| TRI33_MOUSE | E3 ubiquitin-protein ligase TRIM33 OS=Mus musculus GN=Trim33 PE=1 SV=2                                    | 78    | 4        | 1        |
| EC11_MOUSE  | Enoyl-CoA delta isomerase 1, mitochondrial OS=Mus musculus GN=Eci1 PE=1 SV=2                              | 30    | 1        | 1        |
| HNRPU_MOUSE | Heterogeneous nuclear ribonucleoprotein U OS=Mus musculus GN=Hnrpu PE=1 SV=1                              | 72    | 2        | 2        |
| H12_MOUSE   | Histone H1.2 OS=Mus musculus GN=Hist1h1c PE=1 SV=2                                                        | 146   | 7        | 3        |
| H2AV_MOUSE  | Histone H2A.V OS=Mus musculus GN=H2afv PE=1 SV=3                                                          | 60    | 3        | 2        |
| H2B1B_MOUSE | Histone H2B type 1-B OS=Mus musculus GN=Hist1h2bb PE=1 SV=3                                               | 203   | 7        | 4        |
| H4_MOUSE    | Histone H4 OS=Mus musculus GN=Hist1h4a PE=1 SV=2                                                          | 25    | 1        | 1        |
| HXA1_MOUSE  | Homeobox protein Hox-A1 OS=Mus musculus GN=Hoxa1 PE=1 SV=2                                                | 25    | 1        | 1        |
| ITIH2_MOUSE | Inter-alpha-trypsin inhibitor heavy chain H2 OS=Mus musculus GN=Itih2 PE=1 SV=1                           | 43    | 2        | 2        |
| MYBA_MOUSE  | Myb-related protein A OS=Mus musculus GN=Myb1 PE=1 SV=2                                                   | 26    | 1        | 1        |
| MTA70_MOUSE | N6-adenosine-methyltransferase subunit METTL3 OS=Mus musculus GN=Mettl3 PE=1 SV=2                         | 35    | 1        | 1        |
| MPCP_MOUSE  | Phosphate carrier protein, mitochondrial OS=Mus musculus GN=Slc25a3 PE=1 SV=1                             | 51    | 1        | 1        |
| PLX3_MOUSE  | Plexin-A3 OS=Mus musculus GN=Plxna3 PE=1 SV=2                                                             | 25    | 1        | 1        |
| PTRF_MOUSE  | Polymerase I and transcript release factor OS=Mus musculus GN=Ptrf PE=1 SV=1                              | 67    | 2        | 2        |
| BSN_MOUSE   | Protein bassoon OS=Mus musculus GN=Bsn PE=1 SV=4                                                          | 25    | 1        | 1        |
| RTKN2_MOUSE | Rhotekin-2 OS=Mus musculus GN=Rtkn2 PE=1 SV=2                                                             | 29    | 1        | 1        |
| RUNX1_MOUSE | Runt-related transcription factor 1 OS=Mus musculus GN=Runx1 PE=1 SV=1                                    | 25    | 1        | 1        |
| AT2A2_MOUSE | Sarcoplasmic/endoplasmic reticulum calcium ATPase 2 OS=Mus musculus GN=Atp2a2 PE=1 SV=2                   | 28    | 1        | 1        |
| SPTC2_MOUSE | Serine palmitoyltransferase 2 OS=Mus musculus GN=Sptlc2 PE=1 SV=2                                         | 125   | 8        | 1        |
| SDPR_MOUSE  | Serum deprivation-response protein OS=Mus musculus GN=Sdpr PE=1 SV=3                                      | 56    | 2        | 2        |
| SUCA_MOUSE  | Succinyl-CoA ligase [ADP/GDP-forming] subunit alpha, mitochondrial OS=Mus musculus GN=Sucg1 PE=1 SV=4     | 25    | 1        | 1        |
| SAE1_MOUSE  | SUMO-activating enzyme subunit 1 OS=Mus musculus GN=Sae1 PE=1 SV=1                                        | 21    | 1        | 1        |
| GUF1_MOUSE  | Translation factor Guf1, mitochondrial OS=Mus musculus GN=Guf1 PE=1 SV=1                                  | 17    | 1        | 1        |
| ECHA_MOUSE  | Trifunctional enzyme subunit alpha, mitochondrial OS=Mus musculus GN=Hadha PE=1 SV=1                      | 119   | 3        | 3        |
| ECHB_MOUSE  | Trifunctional enzyme subunit beta, mitochondrial OS=Mus musculus GN=Hadhb PE=1 SV=1                       | 81    | 3        | 3        |
| TNNT2_MOUSE | Troponin T, cardiac muscle OS=Mus musculus GN=Tnnt2 PE=1 SV=2                                             | 23    | 1        | 1        |
| RS27A_MOUSE | Ubiquitin-40S ribosomal protein S27a OS=Mus musculus GN=Rps27a PE=1 SV=2                                  | 35    | 1        | 1        |
| CN159_MOUSE | UPF0317 protein C14orf159 homolog, mitochondrial OS=Mus musculus PE=1 SV=1                                | 26    | 2        | 1        |
| VDAC1_MOUSE | Voltage-dependent anion-selective channel protein 1 OS=Mus musculus GN=Vdac1 PE=1 SV=3                    | 48    | 1        | 1        |
| VDAC2_MOUSE | Voltage-dependent anion-selective channel protein 2 OS=Mus musculus GN=Vdac2 PE=1 SV=2                    | 64    | 2        | 2        |

## B. Proteins bound to VEGFA IRES

### Normoxia (0 h)

| Symbol      | Full name                                                                                                 | Score | Spectres | Peptides |
|-------------|-----------------------------------------------------------------------------------------------------------|-------|----------|----------|
| NUCL_MOUSE  | Nucleolin OS=Mus musculus GN=Ncl PE=1 SV=2                                                                | 209   | 7        | 7        |
| ASAP2_MOUSE | Arf-GAP with SH3 domain, ANK repeat and PH domain-containing protein 2 OS=Mus musculus GN=Asap2 PE=1 SV=3 | 28    | 3        | 1        |
| RN181_MOUSE | E3 ubiquitin-protein ligase RNF181 OS=Mus musculus GN=Rnf181 PE=1 SV=1                                    | 26    | 3        | 1        |
| CSPRS_MOUSE | Component of Sp100-rs OS=Mus musculus GN=Csprs PE=2 SV=1                                                  | 23    | 4        | 1        |
| C2C2L_MOUSE | C2 domain-containing protein 2-like OS=Mus musculus GN=C2cd2l PE=1 SV=3                                   | 14    | 1        | 1        |
| SAE1_MOUSE  | SUMO-activating enzyme subunit 1 OS=Mus musculus GN=Sae1 PE=1 SV=1                                        | 14    | 1        | 1        |

### Hypoxia (4 h)

| Symbol      | Full name                                                                                                 | Score | Spectres | Peptides |
|-------------|-----------------------------------------------------------------------------------------------------------|-------|----------|----------|
| ATPA_MOUSE  | ATP synthase subunit alpha, mitochondrial OS=Mus musculus GN=Atp5a1 PE=1 SV=1                             | 42    | 1        | 1        |
| ASAP2_MOUSE | Arf-GAP with SH3 domain, ANK repeat and PH domain-containing protein 2 OS=Mus musculus GN=Asap2 PE=1 SV=3 | 38    | 3        | 1        |
| RN181_MOUSE | E3 ubiquitin-protein ligase RNF181 OS=Mus musculus GN=Rnf181 PE=1 SV=1                                    | 30    | 2        | 1        |
| DOC10_MOUSE | Dedicator of cytokinesis protein 10 OS=Mus musculus GN=Dock10 PE=1 SV=3                                   | 26    | 2        | 1        |
| NID2_MOUSE  | Nidogen-2 OS=Mus musculus GN=Nid2 PE=1 SV=2                                                               | 26    | 2        | 1        |
| C2C2L_MOUSE | C2 domain-containing protein 2-like OS=Mus musculus GN=C2cd2l PE=1 SV=3                                   | 25    | 3        | 1        |
| PLCL1_MOUSE | Inactive phospholipase C-like protein 1 OS=Mus musculus GN=Plcl1 PE=1 SV=3                                | 21    | 1        | 1        |

### Normoxia (4 h)

| Symbol      | Full name                                                                                                 | Score | Spectres | Peptides |
|-------------|-----------------------------------------------------------------------------------------------------------|-------|----------|----------|
| ATPA_MOUSE  | ATP synthase subunit alpha, mitochondrial OS=Mus musculus GN=Atp5a1 PE=1 SV=1                             | 912   | 25       | 16       |
| ATPO_MOUSE  | ATP synthase subunit O, mitochondrial OS=Mus musculus GN=Atp5o PE=1 SV=1                                  | 374   | 12       | 7        |
| ATPB_MOUSE  | ATP synthase subunit beta, mitochondrial OS=Mus musculus GN=Atp5b PE=1 SV=2                               | 372   | 9        | 8        |
| ADT2_MOUSE  | ADP/ATP translocase 2 OS=Mus musculus GN=Slc25a5 PE=1 SV=3                                                | 364   | 8        | 5        |
| HNRPU_MOUSE | Heterogeneous nuclear ribonucleoprotein U OS=Mus musculus GN=Hnrnpu PE=1 SV=1                             | 348   | 12       | 9        |
| ACTA_MOUSE  | Actin, aortic smooth muscle OS=Mus musculus GN=Acta2 PE=1 SV=1                                            | 147   | 2        | 1        |
| ECHA_MOUSE  | Trifunctional enzyme subunit alpha, mitochondrial OS=Mus musculus GN=Hadha PE=1 SV=1                      | 134   | 8        | 8        |
| ACTB_MOUSE  | Actin, cytoplasmic 1 OS=Mus musculus GN=Actb PE=1 SV=1                                                    | 119   | 1        | 1        |
| ALBU_MOUSE  | Serum albumin OS=Mus musculus GN=Alb PE=1 SV=3                                                            | 100   | 1        | 1        |
| SUCA_MOUSE  | Succinyl-CoA ligase [ADP/GDP-forming] subunit alpha, mitochondrial OS=Mus musculus GN=Suc1g1 PE=1 SV=4    | 86    | 1        | 1        |
| ATPG_MOUSE  | ATP synthase subunit gamma, mitochondrial OS=Mus musculus GN=Atp5c1 PE=1 SV=1                             | 78    | 1        | 1        |
| THIM_MOUSE  | 3-ketoacyl-CoA thiolase, mitochondrial OS=Mus musculus GN=Acaa2 PE=1 SV=3                                 | 57    | 1        | 1        |
| SERPH_MOUSE | Serpin H1 OS=Mus musculus GN=Serpinh1 PE=1 SV=3                                                           | 54    | 1        | 1        |
| ASAP2_MOUSE | Arf-GAP with SH3 domain, ANK repeat and PH domain-containing protein 2 OS=Mus musculus GN=Asap2 PE=1 SV=3 | 52    | 3        | 1        |
| PTRF_MOUSE  | Polymerase I and transcript release factor OS=Mus musculus GN=Ptrf PE=1 SV=1                              | 51    | 1        | 1        |
| AT2A2_MOUSE | Sarcoplasmic/endoplasmic reticulum calcium ATPase 2 OS=Mus musculus GN=Atp2a2 PE=1 SV=2                   | 46    | 1        | 1        |
| ILF2_MOUSE  | Interleukin enhancer-binding factor 2 OS=Mus musculus GN=Ilf2 PE=1 SV=1                                   | 43    | 2        | 2        |
| MOC53_MOUSE | Adenylyltransferase and sulfurtransferase MOC53 OS=Mus musculus GN=Mocs3 PE=1 SV=1                        | 39    | 1        | 1        |
| MYOG_MOUSE  | Myogenin OS=Mus musculus GN=Myog PE=1 SV=2                                                                | 33    | 1        | 1        |
| TAGAP_MOUSE | T-cell activation Rho GTPase-activating protein OS=Mus musculus GN=Tagap PE=2 SV=2                        | 27    | 1        | 1        |
| CH60_MOUSE  | 60 kDa heat shock protein, mitochondrial OS=Mus musculus GN=Hspd1 PE=1 SV=1                               | 26    | 1        | 1        |
| C2C2L_MOUSE | C2 domain-containing protein 2-like OS=Mus musculus GN=C2cd2l PE=1 SV=3                                   | 25    | 2        | 1        |
| EFC14_MOUSE | EF-hand calcium-binding domain-containing protein 14 OS=Mus musculus GN=Efcab14 PE=2 SV=1                 | 24    | 1        | 1        |
| SPIR1_MOUSE | Protein spire homolog 1 OS=Mus musculus GN=Spire1 PE=1 SV=1                                               | 24    | 1        | 1        |
| ATAD3_MOUSE | ATPase family AAA domain-containing protein 3 OS=Mus musculus GN=Atad3 PE=1 SV=1                          | 20    | 1        | 1        |

### Hypoxia (8 h)

| Symbol      | Full name                                                                                                 | Score | Spectres | Peptides |
|-------------|-----------------------------------------------------------------------------------------------------------|-------|----------|----------|
| SPTC2_MOUSE | Serine palmitoyltransferase 2 OS=Mus musculus GN=Sptlc2 PE=1 SV=2                                         | 20    | 1        | 1        |
| CCD66_MOUSE | Coiled-coil domain-containing protein 66 OS=Mus musculus GN=Ccdc66 PE=1 SV=3                              | 28    | 1        | 1        |
| ASAP2_MOUSE | Arf-GAP with SH3 domain, ANK repeat and PH domain-containing protein 2 OS=Mus musculus GN=Asap2 PE=1 SV=3 | 35    | 1        | 1        |



## Normoxia (8 h)

| Symbol      | Full name                                                                                                 | Score | Spectres | Peptides |
|-------------|-----------------------------------------------------------------------------------------------------------|-------|----------|----------|
| SPTC2_MOUSE | Serine palmitoyltransferase 2 OS=Mus musculus GN=Sptlc2 PE=1 SV=2                                         | 20    | 1        | 1        |
| CCD66_MOUSE | Coiled-coil domain-containing protein 66 OS=Mus musculus GN=Ccdc66 PE=1 SV=3                              | 28    | 1        | 1        |
| ASAP2_MOUSE | Arf-GAP with SH3 domain, ANK repeat and PH domain-containing protein 2 OS=Mus musculus GN=Asap2 PE=1 SV=3 | 35    | 1        | 1        |
| ATPA_MOUSE  | ATP synthase subunit alpha, mitochondrial OS=Mus musculus GN=Atp5a1 PE=1 SV=1                             | 60    | 1        | 1        |
| PHRF1_MOUSE | PHD and RING finger domain-containing protein 1 OS=Mus musculus GN=Phrf1 PE=1 SV=2                        | 41    | 7        | 1        |
| OXR1_MOUSE  | Oxidation resistance protein 1 OS=Mus musculus GN=Oxr1 PE=1 SV=3                                          | 26    | 1        | 1        |
| KCTD9_MOUSE | BTB/POZ domain-containing protein KCTD9 OS=Mus musculus GN=Kctd9 PE=2 SV=1                                | 24    | 2        | 1        |
| BIK_MOUSE   | Bcl-2-interacting killer OS=Mus musculus GN=Bik PE=1 SV=1                                                 | 21    | 2        | 1        |

## C. Proteins bound to EMCV IRES

### Normoxia (0 h)

| Symbol      | Full name                                                                                                 | Score | Spectres | Peptides |
|-------------|-----------------------------------------------------------------------------------------------------------|-------|----------|----------|
| ASAP2_MOUSE | Arf-GAP with SH3 domain, ANK repeat and PH domain-containing protein 2 OS=Mus musculus GN=Asap2 PE=1 SV=3 | 55    | 2        | 1        |
| ATPA_MOUSE  | ATP synthase subunit alpha, mitochondrial OS=Mus musculus GN=Atp5a1 PE=1 SV=1                             | 70    | 2        | 2        |
| KCTD9_MOUSE | BTB/POZ domain-containing protein KCTD9 OS=Mus musculus GN=Kctd9 PE=2 SV=1                                | 23    | 1        | 1        |
| BRCC3_MOUSE | Lys-63-specific deubiquitinase BRCC36 OS=Mus musculus GN=Brcc3 PE=1 SV=1                                  | 30    | 1        | 1        |
| NDE1_MOUSE  | Nuclear distribution protein nudE homolog 1 OS=Mus musculus GN=Nde1 PE=1 SV=1                             | 21    | 1        | 1        |
| VASH1_MOUSE | Vasohibin-1 OS=Mus musculus GN=Vash1 PE=2 SV=4                                                            | 26    | 1        | 1        |

### Hypoxia (4 h)

| Symbol      | Full name                                                                                                 | Score | Spectres | Peptides |
|-------------|-----------------------------------------------------------------------------------------------------------|-------|----------|----------|
| ASAP2_MOUSE | Arf-GAP with SH3 domain, ANK repeat and PH domain-containing protein 2 OS=Mus musculus GN=Asap2 PE=1 SV=3 | 81    | 5        | 1        |
| KCTD9_MOUSE | BTB/POZ domain-containing protein KCTD9 OS=Mus musculus GN=Kctd9 PE=2 SV=1                                | 23    | 2        | 1        |
| NUDC2_MOUSE | NudC domain-containing protein 2 OS=Mus musculus GN=Nudcd2 PE=1 SV=1                                      | 20    | 1        | 1        |
| PLPL1_MOUSE | Patatin-like phospholipase domain-containing protein 1 OS=Mus musculus GN=Pnpla1 PE=2 SV=1                | 24    | 1        | 1        |
| TAM41_MOUSE | Phosphatidate cytidyltransferase, mitochondrial OS=Mus musculus GN=Tamm41 PE=1 SV=2                       | 21    | 1        | 1        |
| VASH1_MOUSE | Vasohibin-1 OS=Mus musculus GN=Vash1 PE=2 SV=4                                                            | 22    | 3        | 1        |

### Normoxia (4 h)

| Symbol      | Full name                                                                                                 | Score | Spectres | Peptides |
|-------------|-----------------------------------------------------------------------------------------------------------|-------|----------|----------|
| LOX15_MOUSE | Arachidonate 15-lipoxygenase OS=Mus musculus GN=Alox15 PE=1 SV=4                                          | 23    | 1        | 1        |
| ASAP2_MOUSE | Arf-GAP with SH3 domain, ANK repeat and PH domain-containing protein 2 OS=Mus musculus GN=Asap2 PE=1 SV=3 | 88    | 6        | 1        |
| KCTD9_MOUSE | BTB/POZ domain-containing protein KCTD9 OS=Mus musculus GN=Kctd9 PE=2 SV=1                                | 23    | 2        | 1        |
| BRCC3_MOUSE | Lys-63-specific deubiquitinase BRCC36 OS=Mus musculus GN=Brcc3 PE=1 SV=1                                  | 27    | 1        | 1        |
| PCLO_MOUSE  | Protein piccolo OS=Mus musculus GN=Pclo PE=1 SV=4                                                         | 24    | 1        | 1        |
| RPAP1_MOUSE | RNA polymerase II-associated protein 1 OS=Mus musculus GN=Rpap1 PE=1 SV=2                                 | 23    | 1        | 1        |
| ALBU_MOUSE  | Serum albumin OS=Mus musculus GN=Alb PE=1 SV=3                                                            | 73    | 1        | 1        |
| GUF1_MOUSE  | Translation factor Guf1, mitochondrial OS=Mus musculus GN=Guf1 PE=1 SV=1                                  | 24    | 1        | 1        |

### Hypoxia (8 h)

| Symbol      | Full name                                                                                                 | Score | Spectres | Peptides |
|-------------|-----------------------------------------------------------------------------------------------------------|-------|----------|----------|
| ASAP2_MOUSE | Arf-GAP with SH3 domain, ANK repeat and PH domain-containing protein 2 OS=Mus musculus GN=Asap2 PE=1 SV=3 | 36    | 2        | 1        |
| EMAL6_MOUSE | Echinoderm microtubule-associated protein-like 6 OS=Mus musculus GN=Eml6 PE=2 SV=1                        | 30    | 1        | 1        |
| BRCC3_MOUSE | Lys-63-specific deubiquitinase BRCC36 OS=Mus musculus GN=Brcc3 PE=1 SV=1                                  | 24    | 1        | 1        |
| RPAP1_MOUSE | RNA polymerase II-associated protein 1 OS=Mus musculus GN=Rpap1 PE=1 SV=2                                 | 23    | 1        | 1        |
| VASH1_MOUSE | Vasohibin-1 OS=Mus musculus GN=Vash1 PE=2 SV=4                                                            | 26    | 1        | 1        |



| <b>Normoxia (8 h)</b> |                                                                                                           |              |                 |                 |
|-----------------------|-----------------------------------------------------------------------------------------------------------|--------------|-----------------|-----------------|
| <b>Symbol</b>         | <b>Full name</b>                                                                                          | <b>Score</b> | <b>Spectres</b> | <b>Peptides</b> |
| ASAP2_MOUSE           | Arf-GAP with SH3 domain, ANK repeat and PH domain-containing protein 2 OS=Mus musculus GN=Asap2 PE=1 SV=3 | 38           | 4               | 1               |
| ATAD3_MOUSE           | ATPase family AAA domain-containing protein 3 OS=Mus musculus GN=Atad3 PE=1 SV=1                          | 26           | 2               | 1               |
| DOC10_MOUSE           | Dedicator of cytokinesis protein 10 OS=Mus musculus GN=Dock10 PE=1 SV=3                                   | 24           | 1               | 1               |
| NUCL_MOUSE            | Nucleolin OS=Mus musculus GN=Ncl PE=1 SV=2                                                                | 40           | 1               | 1               |
| RPAP1_MOUSE           | RNA polymerase II-associated protein 1 OS=Mus musculus GN=Rpap1 PE=1 SV=2                                 | 29           | 1               | 1               |
| VASH1_MOUSE           | Vasohibin-1 OS=Mus musculus GN=Vash1 PE=2 SV=4                                                            | 28           | 3               | 1               |

**EV Table 4. BIA-MS analysis of IRES-bound proteins in hypoxic cardiomyocytes.**

Total cell extracts from normoxic or hypoxic HL-1 cardiomyocytes were injected into the BIAcore T200 optical biosensor device where biotinylated IRES RNAs had been immobilized. The list of bound proteins identified by mass spectrometry (LC-MS/MS) after tryptic digestion is shown for FGF1 (A), VEGF-Aa (B) or EMCV (C) IRESs, respectively. The score and the number of spectra and peptides identified are indicated. For each time of hypoxia, cells were cultivated the same time in normoxia as a control (Normoxia 4h and 8h).

## FGF1 IRES

| LucF     |            | Biological replicates |       |       |       |       |       |
|----------|------------|-----------------------|-------|-------|-------|-------|-------|
|          | SiRNA      | Experiment            | A     | B     | C     | Mean  | SD    |
| Normoxia | Si Control | 1                     | 6165  | 5235  | 4839  | 5413  | 681   |
|          |            | 2                     | 9056  | 8546  | 8165  | 3917  | 650   |
|          |            | 3                     | 24718 | 28513 | 71475 | 41569 | 25969 |
|          | Si VASH1   | 1                     | 6061  | 4321  | 6130  | 5504  | 1025  |
|          |            | 2                     | 2819  | 4382  | 4771  | 3991  | 907   |
|          |            | 3                     | 25587 | 41809 | 41011 | 36136 | 9144  |
| Hypoxia  | Si Control | 1                     | 23268 | 23282 |       | 23275 | 10    |
|          |            | 2                     | 9056  | 7434  | 4327  | 6939  | 2134  |
|          |            | 3                     | 35934 | 27425 | 41617 | 34992 | 7143  |
|          | Si VASH1   | 1                     | 3476  | 3798  | 3703  | 3659  | 165   |
|          |            | 2                     | 918   | 794   | 159   | 624   | 356   |
|          |            | 3                     | 35078 | 27053 | 26439 | 29523 | 4820  |

  

| LucR     |            | Biological replicates |        |        |        |        |        |
|----------|------------|-----------------------|--------|--------|--------|--------|--------|
|          | SiRNA      | Experiment            | A      | B      | C      | Mean   | SD     |
| Normoxia | Si Control | 1                     | 53438  | 31326  | 43193  | 42652  | 11066  |
|          |            | 2                     | 26638  | 18202  | 41546  | 28795  | 10241  |
|          |            | 3                     | 215819 | 361595 | 537143 | 371519 | 160892 |
|          | Si VASH1   | 1                     | 33640  | 25524  | 46369  | 35178  | 10507  |
|          |            | 2                     | 20966  | 30708  | 37007  | 29560  | 7132   |
|          |            | 3                     | 169661 | 310210 | 232371 | 237414 | 70410  |
| Hypoxia  | Si Control | 1                     | 20104  | 28719  | 24302  | 24375  | 4308   |
|          |            | 2                     | 47957  | 40352  | 28489  | 38933  | 8713   |
|          |            | 3                     | 166883 | 126093 | 212489 | 168488 | 43220  |
|          | Si VASH1   | 1                     | 17915  | 14606  | 17491  | 16671  | 1800   |
|          |            | 2                     | 6722   | 7810   | 5492   | 6675   | 1043   |
|          |            | 3                     | 202073 | 157173 | 139745 | 166330 | 32157  |

## IRES activity

| LucF/ LucR |            | Biological replicates |        |        |        |        |        | AU : LucF/LucR *100 |       | Ratio | t-test | Significance |
|------------|------------|-----------------------|--------|--------|--------|--------|--------|---------------------|-------|-------|--------|--------------|
|            | SiRNA      | Experiment            | A      | B      | C      | Mean   | SD     | Mean                | SD    |       |        |              |
| Normoxia   | Si Control | 1                     | 0.1154 | 0.1671 | 0.1120 | 0.1315 | 0.0309 | 13.15               | 3.09  |       |        |              |
|            |            | 2                     | 0.1325 | 0.1124 | 0.1632 | 0.1360 | 0.0226 | 13.60               | 2.26  |       |        |              |
|            |            | 3                     | 0.1145 | 0.0789 | 0.1331 | 0.1088 | 0.0276 | 10.88               | 2.76  |       |        |              |
|            | Si VASH1   | 1                     | 0.1235 | 0.1379 | 0.1419 | 0.1311 | 0.0154 | 13.11               | 1.54  | 1.00  | 0.440  |              |
|            |            | 2                     | 0.0954 | 0.1482 | 0.1614 | 0.1350 | 0.0307 | 13.50               | 3.07  | 0.99  | 0.483  |              |
|            |            | 3                     | 0.1508 | 0.1348 | 0.1765 | 0.1540 | 0.0210 | 15.40               | 2.10  | 1.42  | 0.008  | **           |
| Hypoxia    | Si Control | 1                     | 1.1574 | 0.8107 |        | 0.9840 | 0.2451 | 98.40               | 24.51 |       |        |              |
|            |            | 2                     | 0.1888 | 0.1840 | 0.1520 | 0.1750 | 0.0187 | 17.50               | 1.87  |       |        |              |
|            |            | 3                     | 0.2153 | 0.2175 | 0.1959 | 0.2096 | 0.0119 | 20.96               | 1.19  |       |        |              |
|            | Si VASH1   | 1                     | 0.1729 | 0.1323 | 0.1524 | 0.1525 | 0.0203 | 15.25               | 2.03  | 0.15  | 0.004  | ***          |
|            |            | 2                     | 0.1364 | 0.1016 | 0.0289 | 0.0890 | 0.0476 | 8.90                | 4.76  | 0.51  | 0.026  | *            |
|            |            | 3                     | 0.1736 | 0.1721 | 0.1892 | 0.1783 | 0.0095 | 17.83               | 0.95  | 0.85  | 0.063  |              |

| Final values |            | AU : LucF/LucR *100 |       | Normalized to Si control |      | t-test | Significance |
|--------------|------------|---------------------|-------|--------------------------|------|--------|--------------|
| Time         | Condition  | Total mean          | SD    | Ratio                    | SD   |        |              |
| Normoxia     | Si Control | 12.54               | 2.74  | 1.00                     | 0.22 |        |              |
|              | Si VASH1   | 14.12               | 2.31  | 1.13                     | 0.18 | 0.094  |              |
| Hypoxia      | Si Control | 39.02               | 37.86 | 1.00                     | 0.97 |        |              |
|              | Si VASH1   | 13.99               | 4.96  | 0.36                     | 0.13 | 0.047  | *            |

## FGF2 IRES

| LucF     |            |            | Biological replicates |         |         | Mean    | SD     |
|----------|------------|------------|-----------------------|---------|---------|---------|--------|
|          | SiRNA      | Experiment | A                     | B       | C       |         |        |
| Normoxia | Si Control | 1          | 22826                 | 21218   | 12844   | 18963   | 5360   |
|          |            | 2          | 1378436               | 1082836 | 1164807 | 1208693 | 152608 |
|          |            | 3          | 83190                 | 93828   | 99601   | 92206   | 8325   |
|          | Si VASH1   | 1          | 21094                 | 24819   | 20555   | 22156   | 2322   |
|          |            | 2          | 2209438               | 826675  | 1840332 | 1625481 | 715981 |
|          |            | 3          | 67392                 | 76305   | 73470   | 72389   | 4554   |
| Hypoxia  | Si Control | 1          | 19965                 | 12844   | 11697   | 14835   | 4480   |
|          |            | 2          | 1017433               | 1179299 | 829663  | 1008798 | 174978 |
|          |            | 3          | 67103                 | 78868   | 71632   | 72534   | 5934   |
|          | Si VASH1   | 1          | 15522                 | 15043   | 16528   | 15698   | 758    |
|          |            | 2          | 893314                | 749103  | 966069  | 869495  | 110427 |
|          |            | 3          | 59989                 | 68906   | 68663   | 65852   | 5080   |

| LucR     |            |            | Biological replicates |          |          | Mean     | SD      |
|----------|------------|------------|-----------------------|----------|----------|----------|---------|
|          | SiRNA      | Experiment | A                     | B        | C        |          |         |
| Normoxia | Si Control | 1          | 180511                | 135180   | 129077   | 148256   | 28100   |
|          |            | 2          | 12202038              | 11842478 | 11986298 | 12010272 | 180975  |
|          |            | 3          | 590388                | 751723   | 757328   | 699813   | 94806   |
|          | Si VASH1   | 1          | 125421                | 125058   | 135793   | 128757   | 6096    |
|          |            | 2          | 14135403              | 8953356  | 10851103 | 11313287 | 2621757 |
|          |            | 3          | 556354                | 613876   | 606021   | 592084   | 31191   |
| Hypoxia  | Si Control | 1          | 96016                 | 67708    | 75468    | 79731    | 14628   |
|          |            | 2          | 6222023               | 7669135  | 5269169  | 6386776  | 1208436 |
|          |            | 3          | 334572                | 394644   | 375540   | 368252   | 30692   |
|          | Si VASH1   | 1          | 68476                 | 61198    | 64605    | 64760    | 3642    |
|          |            | 2          | 4535768               | 4011896  | 5170671  | 4572778  | 580273  |
|          |            | 3          | 392981                | 376414   | 347094   | 372163   | 23237   |

## IRES activity

| LucF/ LucR |            |            | Biological replicates |        |        | AU : LucF/LucR *100 |        | Ratio | t-test | Significance |
|------------|------------|------------|-----------------------|--------|--------|---------------------|--------|-------|--------|--------------|
|            | SiRNA      | Experiment | A                     | B      | C      | Mean                | SD     |       |        |              |
| Normoxia   | Si Control | 1          | 0.1265                | 0.1570 | 0.0995 | 0.1276              | 0.0287 | 12.76 | 2.87   |              |
|            |            | 2          | 0.1130                | 0.0914 | 0.0972 | 0.1005              | 0.0111 | 10.05 | 1.11   |              |
|            |            | 3          | 0.1409                | 0.1248 | 0.1315 | 0.1324              | 0.0081 | 13.24 | 0.81   |              |
|            | Si VASH1   | 1          | 0.1169                | 0.1836 | 0.1592 | 0.1532              | 0.0338 | 15.32 | 3.38   | 1.20         |
|            |            | 2          | 0.1563                | 0.0923 | 0.1696 | 0.1394              | 0.0413 | 13.94 | 4.13   | 1.39         |
|            |            | 3          | 0.1211                | 0.1243 | 0.1212 | 0.1222              | 0.0018 | 12.22 | 0.18   | 0.92         |
| Hypoxia    | Si Control | 1          | 0.2079                | 0.1897 | 0.1550 | 0.1842              | 0.0269 | 18.42 | 2.69   |              |
|            |            | 2          | 0.1635                | 0.1538 | 0.1575 | 0.1582              | 0.0049 | 15.82 | 0.49   |              |
|            |            | 3          | 0.2006                | 0.1998 | 0.1907 | 0.1971              | 0.0055 | 19.71 | 0.55   |              |
|            | Si VASH1   | 1          | 0.1617                | 0.2222 | 0.2190 | 0.2009              | 0.0341 | 20.09 | 3.41   | 1.09         |
|            |            | 2          | 0.1969                | 0.1867 | 0.1868 | 0.1902              | 0.0059 | 19.02 | 0.59   | 1.20         |
|            |            | 3          | 0.1526                | 0.1831 | 0.1978 | 0.1778              | 0.0230 | 17.78 | 2.30   | 0.90         |

| Final values |            | AU : LucF/LucR *100 |      | Normalized to Si control |      | t-test | Significance |
|--------------|------------|---------------------|------|--------------------------|------|--------|--------------|
| Time         | Condition  | Total mean          | SD   | Ratio                    | SD   |        |              |
| Normoxia     | Si Control | 12.02               | 2.18 | 1.00                     | 0.18 |        |              |
|              | Si VASH1   | 13.83               | 2.99 | 1.15                     | 0.25 | 0.073  |              |
| Hypoxia      | Si Control | 17.98               | 2.21 | 1.00                     | 0.12 |        |              |
|              | Si VASH1   | 18.97               | 2.31 | 1.05                     | 0.13 | 0.235  |              |

## VEGFA IRES a

| LucF     |            |            | Biological replicates |       |       | Mean  | SD   |
|----------|------------|------------|-----------------------|-------|-------|-------|------|
|          | SiRNA      | Experiment | A                     | B     | C     |       |      |
| Normoxia | Si Control | 1          | 1063                  | 768   | 835   | 889   | 155  |
|          |            | 2          | 10177                 | 10903 | 9795  | 10292 | 563  |
|          |            | 3          | 8927                  | 10090 | 10353 | 9790  | 759  |
|          | Si VASH1   | 1          | ND                    | ND    | ND    |       |      |
|          |            | 2          | 12008                 | 10355 | 13047 | 11803 | 1357 |
|          |            | 3          | 7081                  | 6763  | 7085  | 6976  | 185  |
| Hypoxia  | Si Control | 1          | 944                   | 938   | 958   | 947   | 10   |
|          |            | 2          | 21334                 | 25229 | 24602 | 23722 | 2091 |
|          |            | 3          | 6919                  | 8893  | 10550 | 8787  | 1818 |
|          | Si VASH1   | 1          | 985                   | 1284  | 1040  | 1103  | 159  |
|          |            | 2          | 18934                 | 25104 | 26388 | 23475 | 3985 |
|          |            | 3          | 6087                  | 5714  | 5375  | 5725  | 356  |

  

| LucR     |            |            | Biological replicates |         |         | Mean    | SD     |
|----------|------------|------------|-----------------------|---------|---------|---------|--------|
|          | SiRNA      | Experiment | A                     | B       | C       |         |        |
| Normoxia | Si Control | 1          | 110313                | 88187   | 88187   | 95563   | 12774  |
|          |            | 2          | 858315                | 1006460 | 1131780 | 998852  | 136891 |
|          |            | 3          | 800801                | 851785  | 976533  | 876373  | 90409  |
|          | Si VASH1   | 1          | 104087                | 104234  | 88328   | 98883   | 9141   |
|          |            | 2          | 1122644               | 949786  | 1245834 | 1106088 | 148717 |
|          |            | 3          | 781558                | 904997  | 1041730 | 909428  | 130143 |
| Hypoxia  | Si Control | 1          | 110313                | 88187   | 88187   | 95563   | 12774  |
|          |            | 2          | 1201671               | 1239986 | 1269291 | 1236983 | 33910  |
|          |            | 3          | 397755                | 412761  | 462290  | 424269  | 33772  |
|          | Si VASH1   | 1          | 104087                | 104234  | 88328   | 98883   | 9141   |
|          |            | 2          | 1178924               | 1314113 | 1411139 | 1301392 | 116629 |
|          |            | 3          | 397766                | 338569  | 370795  | 369043  | 29638  |

## IRES activity

| LucF/ LucR |            | Biological replicates |        |        | AU : LucF/LucR *100 |        |        |      |      |       |        |              |
|------------|------------|-----------------------|--------|--------|---------------------|--------|--------|------|------|-------|--------|--------------|
|            | SiRNA      | Experiment            | A      | B      | C                   | Mean   | SD     | Mean | SD   | Ratio | t-test | Significance |
| Normoxia   | Si Control | 1                     | 0.0084 | 0.0083 | 0.0091              | 0.0086 | 0.0004 | 0.86 | 0.04 |       |        |              |
|            |            | 2                     | 0.0119 | 0.0108 | 0.0087              | 0.0104 | 0.0016 | 1.04 | 0.16 |       |        |              |
|            |            | 3                     | 0.0111 | 0.0118 | 0.0106              | 0.0112 | 0.0006 | 1.12 | 0.06 |       |        |              |
|            | Si VASH1   | 1                     | ND     | ND     | ND                  |        |        |      |      |       |        |              |
|            |            | 2                     | 0.0107 | 0.0109 | 0.0105              | 0.0107 | 0.0002 | 1.07 | 0.02 | 1.02  | 0.403  |              |
|            |            | 3                     | 0.0089 | 0.0098 | 0.0101              | 0.0096 | 0.0007 | 0.96 | 0.07 | 0.86  | 0.053  |              |
| Hypoxia    | Si Control | 1                     | 0.0086 | 0.0106 | 0.0109              | 0.0100 | 0.0013 | 1.00 | 0.13 |       |        |              |
|            |            | 2                     | 0.0178 | 0.0203 | 0.0194              | 0.0192 | 0.0013 | 1.92 | 0.13 |       |        |              |
|            |            | 3                     | 0.0178 | 0.0164 | 0.0153              | 0.0165 | 0.0012 | 1.65 | 0.12 |       |        |              |
|            | Si VASH1   | 1                     | 0.0089 | 0.0146 | 0.0118              | 0.0118 | 0.0028 | 1.18 | 0.28 | 1.17  | 0.185  |              |
|            |            | 2                     | 0.0161 | 0.0191 | 0.0187              | 0.0180 | 0.0017 | 1.80 | 0.17 | 0.94  | 0.027  | *            |
|            |            | 3                     | 0.0153 | 0.0169 | 0.0145              | 0.0156 | 0.0012 | 1.56 | 0.12 | 0.94  | 0.194  |              |

| Final values |            | AU : LucF/LucR *100 |      | Normalized to Si control |      |        |              |
|--------------|------------|---------------------|------|--------------------------|------|--------|--------------|
| Time         | Condition  | Total mean          | SD   | Ratio                    | SD   | t-test | Significance |
| Normoxia     | Si Control | 1.01                | 0.15 | 1.00                     | 0.14 |        |              |
|              | Si VASH1   | 1.01                | 0.07 | 1.01                     | 0.07 | 0.162  |              |
| Hypoxia      | Si Control | 1.52                | 0.42 | 1.00                     | 0.28 |        |              |
|              | Si VASH1   | 1.51                | 0.32 | 0.99                     | 0.21 | 0.417  |              |

## VEGFA IRES b

| LucF     |            |            | Biological replicates |         |         |         |       |
|----------|------------|------------|-----------------------|---------|---------|---------|-------|
|          | SiRNA      | Experiment | A                     | B       | C       | Mean    | SD    |
| Normoxia | Si Control | 1          | 24407                 | 29293   | 28866   | 27522   | 2706  |
|          |            | 2          | 636888                | 673362  | 711456  | 673902  | 37287 |
|          |            | 3          | 336029                | 485230  | 456130  | 425796  | 79091 |
|          | Si VASH1   | 1          | 26057                 | 23895   | 24286   | 24746   | 1152  |
|          |            | 2          | 754530                | 811206  | 796490  | 787408  | 29409 |
|          |            | 3          | 377720                | 490184  | 368048  | 411984  | 67896 |
| Hypoxia  | Si Control | 1          | 25539                 | 27250   | 27360   | 26716   | 1021  |
|          |            | 2          | 1455967               | 1495875 | 1461388 | 1471077 | 21646 |
|          |            | 3          | 252396                | 325862  | 292610  | 290290  | 36788 |
|          | Si VASH1   | 1          | 29633                 | 27197   | 27734   | 28188   | 1280  |
|          |            | 2          | 1442573               | 1496275 | 1406109 | 1448319 | 45357 |
|          |            | 3          | 290051                | 301154  | 292703  | 294636  | 5799  |

  

| LucR     |            |            | Biological replicates |         |         |         |        |
|----------|------------|------------|-----------------------|---------|---------|---------|--------|
|          | SiRNA      | Experiment | A                     | B       | C       | Mean    | SD     |
| Normoxia | Si Control | 1          | 204606                | 259243  | 265657  | 243169  | 33550  |
|          |            | 2          | 3953413               | 4461082 | 4955118 | 4456538 | 500868 |
|          |            | 3          | 2785870               | 3180830 | 2979085 | 2981929 | 197495 |
|          | Si VASH1   | 1          | 129783                | 131937  | 114093  | 125271  | 9740   |
|          |            | 2          | 4588230               | 4469611 | 4706020 | 4587954 | 118204 |
|          |            | 3          | 3035339               | 3373906 | 2706872 | 3038706 | 333530 |
| Hypoxia  | Si Control | 1          | 207937                | 216079  | 211792  | 211936  | 4073   |
|          |            | 2          | 5227968               | 5137726 | 5358864 | 5241519 | 111190 |
|          |            | 3          | 1206699               | 1464757 | 1496579 | 1389345 | 158974 |
|          | Si VASH1   | 1          | 179775                | 171019  | 145280  | 165358  | 17930  |
|          |            | 2          | 5346747               | 5752000 | 5164154 | 5420967 | 300869 |
|          |            | 3          | 1221397               | 1296195 | 1237799 | 1251797 | 39315  |

## IRES activity

| LucF/ LucR |            | Biological replicates |        |        |        |        |        | AU : LucF/LucR *100 |      | Ratio | t-test | Significance |
|------------|------------|-----------------------|--------|--------|--------|--------|--------|---------------------|------|-------|--------|--------------|
|            | SiRNA      | Experiment            | A      | B      | C      | Mean   | SD     | Mean                | SD   |       |        |              |
| Normoxia   | Si Control | 1                     | 0.1193 | 0.1130 | 0.1087 | 0.1136 | 0.0053 | 11.36               | 0.53 |       |        |              |
|            |            | 2                     | 0.1611 | 0.1509 | 0.1436 | 0.1519 | 0.0088 | 15.19               | 0.88 |       |        |              |
|            |            | 3                     | 0.1206 | 0.1525 | 0.1531 | 0.1421 | 0.0186 | 14.21               | 1.86 |       |        |              |
|            | Si VASH1   | 1                     | 0.1274 | 0.0922 | 0.0914 | 0.1036 | 0.0205 | 10.36               | 2.05 | 0.91  | 0.064  |              |
|            |            | 2                     | 0.1644 | 0.1815 | 0.1692 | 0.1717 | 0.0088 | 17.17               | 0.88 | 1.13  | 0.071  |              |
|            |            | 3                     | 0.1244 | 0.1453 | 0.1360 | 0.1352 | 0.0104 | 13.52               | 1.04 | 0.95  | 0.019  | *            |
| Hypoxia    | Si Control | 1                     | 0.1228 | 0.1261 | 0.1292 | 0.1260 | 0.0032 | 12.60               | 0.32 |       |        |              |
|            |            | 2                     | 0.2785 | 0.2912 | 0.2727 | 0.2808 | 0.0094 | 28.08               | 0.94 |       |        |              |
|            |            | 3                     | 0.2092 | 0.2225 | 0.1955 | 0.2091 | 0.0135 | 20.91               | 1.35 |       |        |              |
|            | Si VASH1   | 1                     | 0.1425 | 0.1259 | 0.1309 | 0.1331 | 0.0085 | 13.31               | 0.85 | 1.06  | 0.190  |              |
|            |            | 2                     | 0.2698 | 0.2601 | 0.2723 | 0.2674 | 0.0064 | 26.74               | 0.64 | 0.95  | 0.140  |              |
|            |            | 3                     | 0.2375 | 0.2323 | 0.2365 | 0.2354 | 0.0027 | 23.54               | 0.27 | 1.13  | 0.050  |              |

| Final values |            | AU : LucF/LucR *100 |      | Normalized to Si control |      | t-test | Significance |
|--------------|------------|---------------------|------|--------------------------|------|--------|--------------|
| Time         | Condition  | Total mean          | SD   | Ratio                    | SD   |        |              |
| Normoxia     | Si Control | 13.59               | 2.02 | 1.00                     | 0.15 |        |              |
|              | Si VASH1   | 13.69               | 3.20 | 1.01                     | 0.24 | 0.438  |              |
| Hypoxia      | Si Control | 20.53               | 6.76 | 1.00                     | 0.33 |        |              |
|              | Si VASH1   | 21.20               | 6.10 | 1.03                     | 0.30 | 0.186  |              |

# VEGFC IRES

| LucF     |            | Biological replicates |        |        |        |        |       |  |  |
|----------|------------|-----------------------|--------|--------|--------|--------|-------|--|--|
|          | SiRNA      | Experiment            | A      | B      | C      | Mean   | SD    |  |  |
| Normoxia | Si Control | 1                     | 246375 | 242933 | 314902 | 268070 | 40594 |  |  |
|          |            | 2                     | 217056 | 137257 | 253247 | 202520 | 59346 |  |  |
|          |            | 3                     | 34901  | 43369  | 30196  | 36155  | 6676  |  |  |
|          | Si VASH1   | 1                     | 487878 | 477149 | 492814 | 485947 | 8009  |  |  |
|          |            | 2                     | 229290 | 246978 | 182056 | 219441 | 33563 |  |  |
|          |            | 3                     | 38245  | 41693  | 27884  | 35941  | 7187  |  |  |
| Hypoxia  | Si Control | 1                     | 335045 | 434617 | 425637 | 398433 | 55079 |  |  |
|          |            | 2                     | 281808 | 313489 | 279125 | 291474 | 19113 |  |  |
|          |            | 3                     | 24456  | 25053  | 23295  | 24268  | 894   |  |  |
|          | Si VASH1   | 1                     | 356286 | 400146 | 398669 | 385034 | 24907 |  |  |
|          |            | 2                     | 307224 | 258394 | 357857 | 307825 | 49734 |  |  |
|          |            | 3                     | 20099  | 20436  | 22661  | 21065  | 1392  |  |  |

  

| LucR     |            | Biological replicates |         |         |         |         |         |  |  |
|----------|------------|-----------------------|---------|---------|---------|---------|---------|--|--|
|          | SiRNA      | Experiment            | A       | B       | C       | Mean    | SD      |  |  |
| Normoxia | Si Control | 1                     | 3487442 | 3595724 | 2160847 | 3081337 | 799005  |  |  |
|          |            | 2                     | 1940200 | 1317594 | 1986534 | 1748109 | 373556  |  |  |
|          |            | 3                     | 517859  | 522417  | 438634  | 492970  | 47111   |  |  |
|          | Si VASH1   | 1                     | 5663195 | 5510976 | 2230869 | 4468347 | 1939207 |  |  |
|          |            | 2                     | 1895114 | 2069968 | 1309904 | 1758329 | 398067  |  |  |
|          |            | 3                     | 562597  | 580376  | 487313  | 543428  | 49404   |  |  |
| Hypoxia  | Si Control | 1                     | 3743871 | 4296534 | 1914906 | 3318437 | 1246509 |  |  |
|          |            | 2                     | 2035704 | 2389202 | 2247759 | 2224222 | 177921  |  |  |
|          |            | 3                     | 288505  | 254400  | 261953  | 268286  | 17913   |  |  |
|          | Si VASH1   | 1                     | 3382601 | 3988748 | 1245215 | 2872188 | 1441227 |  |  |
|          |            | 2                     | 2242942 | 2337124 | 2558068 | 2379378 | 161757  |  |  |
|          |            | 3                     | 190852  | 185250  | 218449  | 198184  | 17773   |  |  |

## IRES activity

| LucF/ LucR |            |            | Biological replicates |        |        |        |        | AU : LucF/LucR *100 |       |       |        |              |
|------------|------------|------------|-----------------------|--------|--------|--------|--------|---------------------|-------|-------|--------|--------------|
|            | SiRNA      | Experiment | A                     | B      | C      | Mean   | SD     | Mean                | SD    | Ratio | t-test | Significance |
| Normoxia   | Si Control | 1          | 0.0706                | 0.0676 | 0.1457 | 0.0946 | 0.0443 | 9.46                | 4.43  |       |        |              |
|            |            | 2          | 0.1119                | 0.1042 | 0.1275 | 0.1145 | 0.0119 | 11.45               | 1.19  |       |        |              |
|            |            | 3          | 0.0674                | 0.0830 | 0.0688 | 0.0731 | 0.0086 | 7.31                | 0.86  |       |        |              |
|            | Si VASH1   | 1          | 0.0861                | 0.0866 | 0.2209 | 0.1312 | 0.0777 | 13.12               | 7.77  | 1.39  | 0.100  |              |
|            |            | 2          | 0.1210                | 0.1193 | 0.1390 | 0.1264 | 0.0109 | 12.64               | 1.09  | 1.10  | 0.010  | *            |
|            |            | 3          | 0.0680                | 0.0718 | 0.0572 | 0.0657 | 0.0076 | 6.57                | 0.76  | 0.90  | 0.103  |              |
| Hypoxia    | Si Control | 1          | 0.0895                | 0.1012 | 0.2223 | 0.1376 | 0.0735 | 13.76               | 7.35  |       |        |              |
|            |            | 2          | 0.1384                | 0.1312 | 0.1242 | 0.1313 | 0.0071 | 13.13               | 0.71  |       |        |              |
|            |            | 3          | 0.0848                | 0.0985 | 0.0889 | 0.0907 | 0.0070 | 9.07                | 0.70  |       |        |              |
|            | Si VASH1   | 1          | 0.1053                | 0.1003 | 0.3202 | 0.1753 | 0.1255 | 17.53               | 12.55 | 1.27  | 0.171  |              |
|            |            | 2          | 0.1370                | 0.1106 | 0.1399 | 0.1291 | 0.0162 | 12.91               | 1.62  | 0.98  | 0.429  |              |
|            |            | 3          | 0.1053                | 0.1103 | 0.1037 | 0.1065 | 0.0034 | 10.65               | 0.34  | 1.17  | 0.013  | *            |

| Final values |            | AU : LucF/LucR *100 |      | Normalized to Si control |      |        |              |
|--------------|------------|---------------------|------|--------------------------|------|--------|--------------|
| Time         | Condition  | Total mean          | SD   | Ratio                    | SD   | t-test | Significance |
| Normoxia     | Si Control | 9.41                | 2.94 | 1.00                     | 0.31 |        |              |
|              | Si VASH1   | 10.78               | 5.05 | 1.15                     | 0.54 | 0.074  |              |
| Hypoxia      | Si Control | 11.99               | 4.32 | 1.00                     | 0.36 |        |              |
|              | Si VASH1   | 13.70               | 7.02 | 1.14                     | 0.59 | 0.079  |              |



## VEGFD IRES

| LucF     |            |            | Biological replicates |        |        |        |       |
|----------|------------|------------|-----------------------|--------|--------|--------|-------|
|          | SiRNA      | Experiment | A                     | B      | C      | Mean   | SD    |
| Normoxia | Si Control | 1          | 145323                | 155346 | 154191 | 151620 | 5484  |
|          |            | 2          | 47796                 | 48288  | 42436  | 46173  | 3246  |
|          |            | 3          | 75842                 | 68756  | 63160  | 69253  | 6355  |
|          | Si VASH1   | 1          | 194207                | 225219 | 224077 | 214501 | 17584 |
|          |            | 2          | 41472                 | 53177  | 48922  | 47857  | 5925  |
|          |            | 3          | 50506                 | 69895  | 67848  | 62750  | 10653 |
| Hypoxia  | Si Control | 1          | 195382                | 241996 | 212936 | 216772 | 23542 |
|          |            | 2          | 86899                 | 103834 | 88966  | 93233  | 9239  |
|          |            | 3          | 38323                 | 41266  | 45431  | 41673  | 3571  |
|          | Si VASH1   | 1          | 179053                | 197152 | 112369 | 162858 | 44651 |
|          |            | 2          | 79555                 | 81056  | 77725  | 79445  | 1668  |
|          |            | 3          | 29441                 | 36166  | 41950  | 35852  | 6260  |

| LucR     |            |            | Biological replicates |         |         |         |        |
|----------|------------|------------|-----------------------|---------|---------|---------|--------|
|          | SiRNA      | Experiment | A                     | B       | C       | Mean    | SD     |
| Normoxia | Si Control | 1          | 1907458               | 2093765 | 2160847 | 2054023 | 131286 |
|          |            | 2          | 567674                | 597668  | 541654  | 568999  | 28030  |
|          |            | 3          | 858060                | 837030  | 638997  | 778029  | 120864 |
|          | Si VASH1   | 1          | 1991236               | 2298870 | 2230869 | 2173658 | 161600 |
|          |            | 2          | 517993                | 560985  | 512755  | 530578  | 26463  |
|          |            | 3          | 593777                | 780959  | 789452  | 721396  | 110603 |
| Hypoxia  | Si Control | 1          | 1619167               | 1897011 | 1914906 | 1810361 | 165821 |
|          |            | 2          | 525002                | 615275  | 500416  | 546898  | 60479  |
|          |            | 3          | 326465                | 350347  | 383692  | 353501  | 28743  |
|          | Si VASH1   | 1          | 1641814               | 1672889 | 1245215 | 1519972 | 238454 |
|          |            | 2          | 536248                | 545353  | 584930  | 555510  | 25882  |
|          |            | 3          | 278668                | 318382  | 374719  | 323923  | 48265  |

## IRES activity

| LucF/ LucR |            | Biological replicates |        |        |        |        |        | AU : LucF/LucR *100 |      | Ratio | t-test | Significance |
|------------|------------|-----------------------|--------|--------|--------|--------|--------|---------------------|------|-------|--------|--------------|
|            | SiRNA      | Experiment            | A      | B      | C      | Mean   | SD     | Mean                | SD   |       |        |              |
| Normoxia   | Si Control | 1                     | 0.0762 | 0.0742 | 0.0714 | 0.0739 | 0.0024 | 7.39                | 0.24 |       |        |              |
|            |            | 2                     | 0.0842 | 0.0808 | 0.0783 | 0.0811 | 0.0029 | 8.11                | 0.29 |       |        |              |
|            |            | 3                     | 0.0884 | 0.0821 | 0.0988 | 0.0898 | 0.0084 | 8.98                | 0.84 |       |        |              |
|            | Si VASH1   | 1                     | 0.0975 | 0.0980 | 0.1004 | 0.0986 | 0.0016 | 9.86                | 0.16 | 1.33  | 0.004  | ***          |
|            |            | 2                     | 0.0801 | 0.0948 | 0.0954 | 0.0901 | 0.0087 | 9.01                | 0.87 | 1.11  | 0.154  |              |
|            |            | 3                     | 0.0851 | 0.0895 | 0.0859 | 0.0868 | 0.0024 | 8.68                | 0.24 | 0.97  | 0.332  |              |
| Hypoxia    | Si Control | 1                     | 0.1207 | 0.1276 | 0.1112 | 0.1198 | 0.0082 | 11.98               | 0.82 |       |        |              |
|            |            | 2                     | 0.1655 | 0.1688 | 0.1778 | 0.1707 | 0.0064 | 17.07               | 0.64 |       |        |              |
|            |            | 3                     | 0.1174 | 0.1178 | 0.1184 | 0.1179 | 0.0005 | 11.79               | 0.05 |       |        |              |
|            | Si VASH1   | 1                     | 0.1091 | 0.1179 | 0.0902 | 0.1057 | 0.0141 | 10.57               | 1.41 | 0.88  | 0.028  | *            |
|            |            | 2                     | 0.1484 | 0.1486 | 0.1329 | 0.1433 | 0.0090 | 14.33               | 0.90 | 0.84  | 0.045  | *            |
|            |            | 3                     | 0.1057 | 0.1136 | 0.1120 | 0.1104 | 0.0042 | 11.04               | 0.42 | 0.94  | 0.040  | *            |

| Final values |            | AU : LucF/LucR *100 |      | Normalized to Si control |      | t-test | Significance |
|--------------|------------|---------------------|------|--------------------------|------|--------|--------------|
| Time         | Condition  | Total mean          | SD   | Ratio                    | SD   |        |              |
| Normoxia     | Si Control | 8.16                | 0.83 | 1.00                     | 0.10 |        |              |
|              | Si VASH1   | 9.19                | 0.70 | 1.13                     | 0.09 | 0.033  | *            |
| Hypoxia      | Si Control | 13.61               | 2.65 | 1.00                     | 0.19 |        |              |
|              | Si VASH1   | 11.98               | 1.97 | 0.88                     | 0.14 | 0.002  | ***          |

## c-myc IRES

| LucF     |            | Biological replicates |         |         |         |         |        |  |  |
|----------|------------|-----------------------|---------|---------|---------|---------|--------|--|--|
|          | SiRNA      | Experiment            | A       | B       | C       | Mean    | SD     |  |  |
| Normoxia | Si Control | 1                     | 252109  | 291920  | 918687  | 487572  | 373887 |  |  |
|          |            | 2                     | 325307  | 384619  | 326642  | 345523  | 33865  |  |  |
|          |            | 3                     | 249643  | 233046  | 183453  | 222047  | 34439  |  |  |
|          | Si VASH1   | 1                     | 1424225 | 1180035 | 1295701 | 1299987 | 122151 |  |  |
|          |            | 2                     | 352401  | 300184  | 317795  | 323460  | 26565  |  |  |
|          |            | 3                     | 186267  | 182128  | 179026  | 182474  | 3633   |  |  |
| Hypoxia  | Si Control | 1                     | 816497  | 422387  | 80789   | 439891  | 368166 |  |  |
|          |            | 2                     | 575691  | 601917  | 534370  | 570659  | 34053  |  |  |
|          |            | 3                     | 183838  | 194270  | 220011  | 199373  | 18619  |  |  |
|          | Si VASH1   | 1                     | 622268  | 530019  | 497331  | 549872  | 64791  |  |  |
|          |            | 2                     | 518194  | 406193  | 591820  | 505402  | 93472  |  |  |
|          |            | 3                     | 178636  | 177011  | 163963  | 173203  | 8043   |  |  |

  

| LucR     |            | Biological replicates |         |         |         |         |         |  |  |
|----------|------------|-----------------------|---------|---------|---------|---------|---------|--|--|
|          | SiRNA      | Experiment            | A       | B       | C       | Mean    | SD      |  |  |
| Normoxia | Si Control | 1                     | 2603194 | 2581366 | 4956962 | 3380507 | 1365294 |  |  |
|          |            | 2                     | 1216742 | 1371688 | 1207546 | 1265325 | 92227   |  |  |
|          |            | 3                     | 1738743 | 1532354 | 1438325 | 1569807 | 153671  |  |  |
|          | Si VASH1   | 1                     | 6466612 | 5522384 | 5429788 | 5806261 | 573752  |  |  |
|          |            | 2                     | 1197183 | 1080280 | 1156255 | 1144572 | 59321   |  |  |
|          |            | 3                     | 1513541 | 1375704 | 1410980 | 1433408 | 71603   |  |  |
| Hypoxia  | Si Control | 1                     | 3585096 | 2670578 | 530645  | 2262106 | 1567659 |  |  |
|          |            | 2                     | 1405500 | 1480296 | 1467212 | 1451002 | 39946   |  |  |
|          |            | 3                     | 775271  | 746257  | 985294  | 835607  | 130442  |  |  |
|          | Si VASH1   | 1                     | 2552808 | 2119514 | 2073981 | 2248768 | 264289  |  |  |
|          |            | 2                     | 1449064 | 1365072 | 1405441 | 1406526 | 42006   |  |  |
|          |            | 3                     | 868202  | 777132  | 863443  | 836259  | 51261   |  |  |

## IRES activity

| LucF/ LucR |            | Biological replicates |        |        |        |        |        | AU : LucF/LucR *100 |      |       |        |              |
|------------|------------|-----------------------|--------|--------|--------|--------|--------|---------------------|------|-------|--------|--------------|
|            | SiRNA      | Experiment            | A      | B      | C      | Mean   | SD     | Mean                | SD   | Ratio | t-test | Significance |
| Normoxia   | Si Control | 1                     | 0.0968 | 0.1131 | 0.1853 | 0.1318 | 0.0471 | 13.18               | 4.71 |       |        |              |
|            |            | 2                     | 0.2674 | 0.2804 | 0.2705 | 0.2728 | 0.0068 | 27.28               | 0.68 |       |        |              |
|            |            | 3                     | 0.1436 | 0.1521 | 0.1275 | 0.1411 | 0.0125 | 14.11               | 1.25 |       |        |              |
|            | Si VASH1   | 1                     | 0.2202 | 0.2137 | 0.2386 | 0.2242 | 0.0129 | 22.42               | 1.29 | 1.70  | 0.023  | *            |
|            |            | 2                     | 0.2944 | 0.2779 | 0.2748 | 0.2824 | 0.0105 | 28.24               | 1.05 | 1.04  | 0.197  |              |
|            |            | 3                     | 0.1231 | 0.1324 | 0.1269 | 0.1274 | 0.0047 | 12.74               | 0.47 | 0.90  | 0.085  |              |
| Hypoxia    | Si Control | 1                     | 0.2277 | 0.1582 | 0.1522 | 0.1794 | 0.0420 | 17.94               | 4.20 |       |        |              |
|            |            | 2                     | 0.4096 | 0.4066 | 0.3642 | 0.3935 | 0.0254 | 39.35               | 2.54 |       |        |              |
|            |            | 3                     | 0.2371 | 0.2603 | 0.2233 | 0.2402 | 0.0187 | 24.02               | 1.87 |       |        |              |
|            | Si VASH1   | 1                     | 0.2438 | 0.2501 | 0.2398 | 0.2445 | 0.0052 | 24.45               | 0.52 | 1.36  | 0.059  |              |
|            |            | 2                     | 0.3576 | 0.2976 | 0.4211 | 0.3588 | 0.0618 | 35.88               | 6.18 | 0.91  | 0.275  |              |
|            |            | 3                     | 0.2058 | 0.2278 | 0.1899 | 0.2078 | 0.0190 | 20.78               | 1.90 | 0.86  | 0.0002 | ****         |

| Final values |            | AU : LucF/LucR *100 |      | Normalized to Si control |      |        |              |
|--------------|------------|---------------------|------|--------------------------|------|--------|--------------|
| Time         | Condition  | Total mean          | SD   | Ratio                    | SD   | t-test | Significance |
| Normoxia     | Si Control | 18.19               | 7.26 | 1.00                     | 0.40 |        |              |
|              | Si VASH1   | 21.13               | 6.83 | 1.16                     | 0.38 | 0.065  |              |
| Hypoxia      | Si Control | 27.10               | 9.91 | 1.00                     | 0.37 |        |              |
|              | Si VASH1   | 27.04               | 7.55 | 1.00                     | 0.28 | 0.489  |              |

# EMCV IRES

| LucF     |            |            | Biological replicates |         |         | Mean    | SD      |
|----------|------------|------------|-----------------------|---------|---------|---------|---------|
|          | SiRNA      | Experiment | A                     | B       | C       |         |         |
| Normoxia | Si Control | 1          | 1702630               | 1760136 | 1302068 | 1588278 | 249527  |
|          |            | 2          | 107301                | 144501  | 143440  | 131747  | 21177   |
|          |            | 3          | 330170                | 293299  | 266000  | 296490  | 32204   |
|          | Si VASH1   | 1          | 5352755               | 7029602 | 3647215 | 5343191 | 1691214 |
|          |            | 2          | 112778                | 121482  | 113111  | 115790  | 4932    |
|          |            | 3          | 291868                | 245382  | 237669  | 258306  | 29320   |
| Hypoxia  | Si Control | 1          | 2686430               | 2928766 | 2764654 | 2793283 | 123678  |
|          |            | 2          | 223538                | 216316  | 233362  | 224405  | 8556    |
|          |            | 3          | 244519                | 254123  | 209543  | 236062  | 23462   |
|          | Si VASH1   | 1          |                       | 886021  | 2250249 | 1568135 | 964655  |
|          |            | 2          | 221733                | 209587  | 204733  | 212018  | 8756    |
|          |            | 3          | 216546                | 204516  | 186109  | 202390  | 15329   |

| LucR     |            |            | Biological replicates |         |         | Mean    | SD      |
|----------|------------|------------|-----------------------|---------|---------|---------|---------|
|          | SiRNA      | Experiment | A                     | B       | C       |         |         |
| Normoxia | Si Control | 1          | 2208003               | 2016725 | 1796654 | 2007127 | 205843  |
|          |            | 2          | 147772                | 179110  | 161146  | 162676  | 15725   |
|          |            | 3          | 365365                | 327375  | 301181  | 331307  | 32272   |
|          | Si VASH1   | 1          | 5336122               | 6838676 | 2959448 | 5044749 | 1955959 |
|          |            | 2          | 144691                | 146769  | 138309  | 143256  | 4409    |
|          |            | 3          | 316197                | 262296  | 254808  | 277767  | 33491   |
| Hypoxia  | Si Control | 1          | 2156164               | 2373157 | 1936666 | 2155329 | 218246  |
|          |            | 2          | 177395                | 182885  | 198846  | 186375  | 11143   |
|          |            | 3          | 173211                | 189437  | 175377  | 179341  | 8810    |
|          | Si VASH1   | 1          | ND                    | 730239  | 1752792 | 1241515 | 723054  |
|          |            | 2          | 191909                | 168829  | 202128  | 187622  | 17058   |
|          |            | 3          | 170625                | 166261  | 149249  | 162045  | 11294   |

## IRES activity

| LucF/ LucR |            | Biological replicates |        |        |        |        |        | AU : LucF/LucR *100 |       |      | t-test | Significance |
|------------|------------|-----------------------|--------|--------|--------|--------|--------|---------------------|-------|------|--------|--------------|
|            | SiRNA      | Experiment            | A      | B      | C      | Mean   | SD     | Mean                | SD    |      |        |              |
| Normoxia   | Si Control | 1                     | 0.7711 | 0.8728 | 0.7247 | 0.7895 | 0.0757 | 78.95               | 7.57  |      |        |              |
|            |            | 2                     | 0.7261 | 0.8068 | 0.8901 | 0.8077 | 0.0820 | 80.77               | 8.20  |      |        |              |
|            |            | 3                     | 0.9037 | 0.8959 | 0.8832 | 0.8943 | 0.0103 | 89.43               | 1.03  |      |        |              |
|            | Si VASH1   | 1                     | 1.0031 | 1.0279 | 1.2324 | 1.0878 | 0.1258 | 108.78              | 12.58 | 1.38 | 0.054  |              |
|            |            | 2                     | 0.7794 | 0.8277 | 0.8178 | 0.8083 | 0.0255 | 80.83               | 2.55  | 1.00 | 0.494  |              |
|            |            | 3                     | 0.9231 | 0.9355 | 0.9327 | 0.9304 | 0.0065 | 93.04               | 0.65  | 1.04 | 0.028  | *            |
| Hypoxia    | Si Control | 1                     | 1.2459 | 1.2341 | 1.4275 | 1.3025 | 0.1084 | 130.25              | 10.84 |      |        |              |
|            |            | 2                     | 1.2601 | 1.1828 | 1.1736 | 1.2055 | 0.0475 | 120.55              | 4.75  |      |        |              |
|            |            | 3                     | 1.4117 | 1.3415 | 1.1948 | 1.3160 | 0.1107 | 131.60              | 11.07 |      |        |              |
|            | Si VASH1   | 1                     | ND     | 1.2133 | 1.2838 | 1.2486 | 0.0498 | 124.86              | 4.98  | 0.96 | 0.285  |              |
|            |            | 2                     | 1.1554 | 1.2414 | 1.0129 | 1.1366 | 0.1154 | 113.66              | 11.54 | 0.94 | 0.202  |              |
|            |            | 3                     | 1.2691 | 1.2301 | 1.2470 | 1.2487 | 0.0196 | 124.87              | 1.96  | 0.95 | 0.191  |              |

| Final values |            | AU : LucF/LucR *100 |       | Normalized to Si control |      | t-test | Significance |
|--------------|------------|---------------------|-------|--------------------------|------|--------|--------------|
| Time         | Condition  | Total mean          | SD    | Ratio                    | SD   |        |              |
| Normoxia     | Si Control | 83.05               | 7.41  | 1.00                     | 0.09 |        |              |
|              | Si VASH1   | 94.22               | 13.73 | 1.13                     | 0.17 | 0.043  | *            |
| Hypoxia      | Si Control | 127.47              | 9.64  | 1.00                     | 0.08 |        |              |
|              | Si VASH1   | 120.66              | 8.74  | 0.95                     | 0.07 | 0.029  | *            |

**EV Table 5. Knock-down of VASH1 in HL-1 cells.**

HL-1 cells transduced by the different IRES-containing lentivectors were transfected with siRNA siVASH or SiControl and submitted to 8 h of hypoxia. Luciferase activity and IRES activities (ratio LucF/LucR x 100) were measured. The values correspond to the experiments presented Figure 4.

Biological replicates are indicated as A, B and C, whereas independent experiments are indicated as 1, 2, 3. Means, standard deviation (SD) and t-test of IRES activities were calculated. The panels “final values” correspond to means of all experiments (nine values) which are reported in the histograms of Figure 7. P-value significance is indicated: \*p<0.05, \*\*p<0.01, \*\*\*<0.001, \*\*\*\*p<0.0001.

# Hantelys et al, EV Table 6

| Target                   | Forward primer 5' to 3'   | Reverse primer 5' to 3' |
|--------------------------|---------------------------|-------------------------|
| <i>Akt1</i>              | AGAACTCTAGGCATCCCTTCC     | CGTTGGCATACTCCATGACA    |
| <i>Ang</i>               | TCCTGACTCAGCACCATGAC      | ACATCTTTGCAGGGTGAGGTTA  |
| <i>Angpt1</i>            | ACAACACCGGGAAGATGGAA      | TTCACCAGAGGGATTCCCCAAA  |
| <i>Angpt2</i>            | GAACCAGACAGCAGCACAAA      | TCGAGTCTTGTCGTCTGGTTTA  |
| <i>Angptl4</i>           | CTTGGGACCAAGACCATGAC      | TGGCTACAGGTACCAAACCA    |
| <i>Anpep</i>             | TGGGACTTTGTCCGAAGCA       | TCCCTGGATGAGATTGGCAAA   |
| <i>Apln (Apelin)</i>     | GCAGGAGGAAATTTGCGAGAC     | ACTTGGCGAGCCCTTCAA      |
| <i>Aplnr</i>             | TTGACTGGCCTTTTGAACC       | GCAAAAGACACTGGCGTACA    |
| <i>Atp2a2</i>            | CGGTCCAAGAGTCTCCTTCTA     | GCACAATCCACTCCATCGAA    |
| <i>Bai1</i>              | GGTCTGAGAAGCAAACCA        | GACCATTCTGTTCCAGTTTCCA  |
| <i>Ccl11 (Eotaxin)</i>   | CAACAACAGATGCACCCTGAA     | CACAGATCTCTTTGCCCAACC   |
| <i>Ccl2 (mcp-1)</i>      | AGCAGCAGGTGTCCCAAA        | TTCTTGGGGTCAGCACAGAC    |
| <i>Ccl21a</i>            | GTCAGGACTGCTGCCTTAAGTA    | GCTTCTATAGCCTCGGACAA    |
| <i>Cdh5</i>              | AACGAGGACAGCAACTTCAC      | TGGCATGCTCCCGATTAAAC    |
| <i>Col18a1</i>           | CAGGACCAAAGGGTGACAAA      | TTCCAGGTGGAAGAGGTCAA    |
| <i>Col4a3</i>            | GCTGGTACAAAGGGCAACAA      | TAAGCCTGGCAATCCATCCA    |
| <i>Ctgf</i>              | AAGCTGACCTGGAGGAAAACA     | TGCAGCCAGAAAGCTCAAAC    |
| <i>Cxcl1</i>             | CCTGAAGCTCCCTTGTTTCA      | TTCTCCGTTACTTGGGGACAC   |
| <i>Cxcl10 (Inp10)</i>    | ATCCGGAATCTAAGACCATCAAGAA | GCTCTCTGCTGTCCATCCA     |
| <i>Cxcl5 (ena78/lix)</i> | GGCATTCTGTTGCTGTTTAC      | TGCGGCTATGACTGAGGAA     |
| <i>Cxcl9</i>             | AGCCCCAATTGCAACAAAAC      | TCTTCACATTGCCGAGTCC     |
| <i>Cyr61</i>             | CCACACCAAGGGGTTGGAA       | CACAGGGTCTGCCTTCTGAC    |
| <i>Edn1</i>              | CCTGGACATCATCTGGGTCAA     | AACGCTTGGACCTGGAAGAA    |
| <i>Efna1</i>             | TGGGCAAGGAGTTCAAGGAA      | GCACTGGGATTCTGATGGTA    |
| <i>Efnb2</i>             | TGCCAGACAAGAGCCATGAA      | GTCTTGTTGGACCGTGATTCC   |
| <i>Egf</i>               | GGAGAGACTGCTGAGTGTC       | AGCCAGCACACACTCATCTA    |
| <i>Eng</i>               | AGGCATCCAACACCATCGAA      | TCTAGCTGGACTGTGACCTCA   |
| <i>Ephb4</i>             | CCTCACGGAATTTCATGGAGAAC   | ACCAGCTGGATGACTGTGAA    |
| <i>ErbB2 (Her2)</i>      | ATTCTCAGACGCCGGTTCA       | TTGGCCCCAAAGGTCATCA     |
| <i>F3</i>                | ACCCAAACCCACCAACTATACC    | GTGTCTGTGGTTCGAGAAGCA   |
| <i>Fgf1 (aFGF)</i>       | TGGACACCGAAGGGCTTTTA      | GCATGCTTCTTGAGGTGTAA    |
| <i>Fgf2 (bFGF)</i>       | TCTTCTGCGCATCCATCC        | GCACACACTCCCTTGATAGACA  |
| <i>Fgfr3</i>             | AGGATTTAGACCGCATCCTCAC    | CCTGGCGAGTACTGCTCAA     |
| <i>Flt1</i>              | TTGCACGGGAGAGACTGAAA      | GCCAAATGCAGAGGCTTGAA    |
| <i>Fn1</i>               | CGTCATTGCCCTGAAGAACA      | AAGGGTAACAGTTGGGGAA     |
| <i>Hgf</i>               | CATCAAAATGCCAGCCTTGAA     | TCTTTACCGCGATAGCTCGAA   |
| <i>Hif1a</i>             | TCGACACAGCTCGATATGAA      | TTCCGGCTCATAACCCATCA    |
| <i>Hnnpnm</i>            | GATGCCAACCATCTGAGCAAA     | CCAAATCCTATGCCTTCCATTCC |
| <i>Hpse</i>              | GCCTCGAGGGAAGACAGTTAAA    | TGCCATGTAAGAGAGTCGATCAC |

|                        |                          |                        |
|------------------------|--------------------------|------------------------|
| <i>Id1</i>             | ACCCTGAACGGCGAGATCA      | GATCGTCGGCTGGAACACA    |
| <i>Ifna1</i>           | TCCACCAGCAGCTCAATGAC     | TCTTCCTGGGTCAGGGGAAA   |
| <i>Ifng</i>            | GGCACAGTCATTGAAAGCCTA    | GCCAGTTCCTCCAGATATCCA  |
| <i>Igf1</i>            | GAGCTGGTGGATGCTCTTCA     | CTCCGAATGCTGGAGCCATA   |
| <i>Igf1r</i>           | ATGGAGCCTGAGAACATGGA     | CCTTGTGCTCTGAGTGTCTT   |
| <i>Il1b</i>            | TGGCAACTGTTCTGAACTCA     | GGGTCCGTCAACTTCAAAGAAC |
| <i>Il6</i>             | CCAGAAACCGCTATGAAGTTCC   | GTTGTCACCAGCATCAGTCC   |
| <i>Il8</i>             | GGCTACTGTTGGCCCAATTAC    | GCTTCATTGCCGGTGGAAA    |
| <i>Itgav</i>           | AAAGGCAGATGGCAAGGGAA     | GGCTCCCTTCTGCTTGAGTTTA |
| <i>Itgb3</i>           | CCCACCACAGGCAATCAAAA     | GCGTCAGCACGTGTTTGT     |
| <i>Jag1</i>            | TCCAAGCATGGGTCTTGTA      | GATGCACCTGTGCGCAGTACA  |
| <i>Lect1</i>           | CCTGCCGATTTTCTGGCTTA     | AGAGGGAGCACTGTTTCTCA   |
| <i>Lep</i>             | AGACCATTGTCACCAGGATCA    | ATGAAGTCCAAGCCAGTGAC   |
| <i>Mdk</i>             | TTGCCCTCTTGGTGGTCAC      | CCAGGTCCACTCCGAACAC    |
| <i>Mmp14</i>           | CAAGGCTGATTTGGCAACCA     | GCCTTGATCTCAGTCCCAAAC  |
| <i>Mmp2</i>            | CGAGGACTATGACCGGGATA     | GGGCACCTTCTGAATTTCCA   |
| <i>Mmp9</i>            | TCCCCAAAGACCTGAAAACC     | GGGTGTAACCATAGCGGTAC   |
| <i>Neat1</i>           | GGGAAGCTGATTGCCAAGAA     | ATGGTTTCAGAGCCCACAAC   |
| <i>P54nrb</i>          | TGGTACTCCAGCTCCTCCA      | CAGCTTGGCCAAAACGTTCA   |
| <i>Nos3</i>            | GGGATTCTGGCAAGACAGACTA   | GCAGCCAAACACCAAAGTCA   |
| <i>Notch4</i>          | ACCTGCTTGCAACCTTCCA      | GGTGCACTCATTGACCTCCA   |
| <i>Nrp1</i>            | CCTGTATCCTGGGAACTGGTA    | GCCCAACATTCCAGAGCAA    |
| <i>Nrp2</i>            | GTGGATCAGCAGCGCTAAC      | GCCATCACTCTGCAGTTTCAA  |
| <i>PAI1 (serpinE1)</i> | CAGACAATGGAAGGGCAACA     | GAGGTCCACTTCAGTCTCCA   |
| <i>Pdgfa</i>           | TGTAACACCAGCAGCGTCAA     | GGCTTCTTCTGACATACTCCA  |
| <i>Pecam1</i>          | GCACAGTGATGCTGAACAAC     | GTCACCTTGGGCTTGGATAC   |
| <i>Pf4</i>             | CCAGCCTGGAGGTGATCAA      | GGCAAATTTTCTCCATTCTTCA |
| <i>Pgf</i>             | CCAATCGGGATCCACATTTCTA   | GCCTTTGTCGTCTCCAGAATA  |
| <i>Plau (upa)</i>      | TAGCCTAGGCCTGGGGAAA      | AGGCCAATCTGCACATAGCA   |
| <i>Plg</i>             | TGGAATTGCCACAGTTTCC      | CCGATAGTCTTTGCCATTCCC  |
| <i>Prok2</i>           | GGCTTGGCGTGTTTAAGGAC     | GGGTGCGATTTCAAGTCTCTAC |
| <i>Prox1</i>           | GCCCTCAACATGCACTACAAC    | CGTGATCTGCGCAACTTCC    |
| <i>Psf/Sfpq</i>        | TGAAAAGCTGGCCAGAAGAA     | TGTGCCATGCTGAGCAAAAC   |
| <i>Pspc1</i>           | TCCCCGTGGAGCAATAAACA     | ATACCCATCATTGGAGGAGGAC |
| <i>Ptgs1</i>           | TATCACCTGCGGCTCTTCAA     | GTTCCACGGAAGGTGGGTA    |
| <i>S1pr1</i>           | CGGTGTAGACCCAGAGTCC      | GAGAGGCCTCCGAGAAACA    |
| <i>SerpinF1</i>        | AGAACCTCAAGAGTGCTTCCA    | TTCTCCAGAGGGGCAACAAA   |
| <i>Sphk1</i>           | GGCAGCTTCTGTGAACCACTA    | CAGCAGGTTTCATGGGTGACA  |
| <i>Tek</i>             | GTTGGATGGCAATCGAATCAC    | CCAGAGCAATACCCATAGGAC  |
| <i>Tgfa</i>            | CCCTGGCTGTCTCATATCA      | CAGTGTGTCGGAGCTGAC     |
| <i>Tgfb1</i>           | GCTGCGCTTGCAAGAGATTAA    | GTAACGCCAGGAATTGTTGCTA |
| <i>Tgfb2</i>           | GCCCATATCTATGGAGTTCAGACA | AGCGGAAGCTTCGGGATTTA   |



|                      |                        |                        |
|----------------------|------------------------|------------------------|
| <i>Tgfr1</i>         | AATTGCTCGACGCTGTTCTA   | ACCGATGGATCAGAAGGTACA  |
| <i>Thbs1</i>         | CCCCAGAAGACATTCTCAGGAA | CGTTCACCACGTTGTTGTCA   |
| <i>Thbs2</i>         | GACTGCACGTCATGGTGAAC   | CCCAATGAGCTCCAAAAGGAAC |
| <i>Tie1</i>          | CCTTTGCTCAGATCGCACTA   | CTCAAACAGCGACATGTTTAC  |
| <i>Timp1</i>         | TCCCCAGAAATCAACGAGACC  | CATTTCCACAGCCTTGAATCC  |
| <i>Timp2</i>         | GAAGAGCCTGAACCACAGGTA  | TCATCCGGGGAGGAGATGTA   |
| <i>Timp3</i>         | CCCTTTGGCACTCTGGTCTA   | ACGTGGGGCATCTTACTGAA   |
| <i>Tnf</i>           | CAAATGGCCTCCCTCTCATCA  | TGGGCTACAGGCTTGTAC     |
| <i>Tymp</i>          | GGCACACTGGATAAGCTGGAA  | CAGCAGCCGACTTCCTCAA    |
| <i>Vash1</i>         | GGCTGCCAAGTTGGGGTGTGTT | AAACCAGGGCGTGGCTCCTGTA |
| <i>Vegfa</i>         | CCAGCACATAGGAGAGATGAG  | CTGGCTTTGTTCTGTCTTTCTT |
| <i>Vegfb</i>         | GAGATGTCCCTGGAAGAACACA | TGGCTTCACAGCACTCTCC    |
| <i>Vegfc</i>         | AGACGTTCTCTGCCAGCAA    | AGGCATCGGCACATGTAGTTA  |
| <i>Vegfd (figf)</i>  | TCCATTGACACCCAGAAGAA   | GTGTTATCCCACAGCATGTCA  |
| <i>Vegfr2 (Kdr)</i>  | ATTTCACCTGGCACTCTCCA   | TCCCAGGAAAGGGTTTCACA   |
| <i>Vegfr3 (Flt4)</i> | CTCGCTCGGGACATCTACAAA  | GGGCCATCCATTTAGAGGAA   |
| 18S                  | CAACTAAGAACGGCCATGCA   | AGCCTGCGGCTTAATTTGAC   |

**EV Table 6. List of genes and primer couples used in the Fluidigm Deltagene PCR array.**

## Hantelys et al, EV Table 7

| siControl (5' -> 3') | siVASH1 (5'->3')    |
|----------------------|---------------------|
| ACCAAAUGUACAGCUGAUU  | GACACUAGGACCCUUAUU  |
| ACCAAAUGUACAAAAGACU  | CGAAGUUCUGGAUAAAGAG |
| ACCAAAUGUACAAAAGGAU  | CCCUCCUGGACUACAUGUU |
| ACCAAAUGUACAACACACU  | CAUGUUAGUGUGUCCCUGU |

**EV Table 7. SiRNA sequences.** The sequences of the four siRNAs present in the siControl and siVASH1 Smartpools are indicated.
